# Supplementary material for: Visible light sensitization of benzoyl azides: cascade cyclization toward oxindoles via a non-nitrene pathway
Source: Royal Society of Chemistry journal article supplement (doi:10.1039/c7cc04852a), 2017-01-01
Supplement: c7cc04852a1.pdf [file c7cc04852a1.pdf]

## ***Supporting Information***

### **Visible light sensitization of benzoyl azides: cascade cyclization toward oxindoles via a non-nitrene pathway**

Dattatraya B. Bagal,<sup>1,2</sup> Sung-Woo Park,<sup>1,2</sup> Hyun-Ji Song<sup>1,2\*</sup> and Sukbok Chang<sup>1,2\*</sup>

<sup>1</sup>Center for Catalytic Hydrocarbon Functionalization, Institute for Basic Science (IBS)

Daejeon 305-701, Republic of Korea

<sup>2</sup>Department of Chemistry, Korea Advanced Institute of Science & Technology (KAIST)

Daejeon 305-701, Republic of Korea

\*Email: songhyunji@kaist.ac.kr , sbchang@kaist.ac.kr

## Table of Contents

|             |                                                                                                                                          |      |
|-------------|------------------------------------------------------------------------------------------------------------------------------------------|------|
| I           | General Information                                                                                                                      | S-3  |
| II          | General Procedure for the Preparation of Benzoyl Azides                                                                                  | S-4  |
| III         | General Procedure for the Synthesis of <i>N</i> -Arylacrylamides                                                                         | S-4  |
| IV          | Reaction Setup                                                                                                                           | S-5  |
| V           | General Procedure for Aminoarylation of <i>N</i> -Arylmethacrylamides with Benzoyl Azides by Visible Light Photocatalysis                | S-6  |
| VI          | General Procedure for Aminoarylation of <i>N</i> -Aryl-cyclopentene-carboxamides with Benzoyl Azides by Visible Light Photocatalysis     | S-16 |
| VII         | Procedures for Mechanistic Studies                                                                                                       | S-22 |
| VIII        | Emission Spectrum of 20 W Compact Fluorescent Lamp (CFL)                                                                                 | S-26 |
| IX          | Absorption and Emission spectra of the Visible-Light Photocatalyst [Ir{dF(CF <sub>3</sub> )ppy} <sub>2</sub> (dtbbpy)](PF <sub>6</sub> ) | S-26 |
| X           | Emission Quenching Experiment (Stern-Volmer Quenching)                                                                                   | S-27 |
| XI          | DFT Computational Studies and Coordinates of Optimized Structures and Transition States                                                  | S-28 |
| XII         | References                                                                                                                               | S-38 |
| Appendix I  | Spectral Copies of <sup>1</sup> H, <sup>13</sup> C and <sup>19</sup> F NMR of Compounds Obtained in This Study                           | S-40 |
| Appendix II | Crystallographic Data                                                                                                                    | S-79 |
|             | CIF-Data for compound <b>3a</b> (CCDC 1505485)                                                                                           | S-80 |
|             | CIF-Data for compounds <b>5d</b> (CCDC 1505486)                                                                                          | S-91 |

## I. General Information

Unless otherwise specified, all chemicals and reagents were purchased from commercial suppliers. All photochemical reactions were degassed at -78 °C by the Freeze-Pump-Thaw method and carried out under Argon atmosphere unless otherwise stated. A 20 W CFL lamp purchased from Philips was used for all reactions. The photocatalyst complexes Ru(bpy)<sub>3</sub>Cl<sub>2</sub>, Ir(ppy)<sub>3</sub>, and Ir(ppy)<sub>2</sub>(dtbbpy)(PF<sub>6</sub>) are commercially available and were purchased from Sigma Aldrich. [Ir{dF(CF<sub>3</sub>)ppy}<sub>2</sub>(dtbbpy)](PF<sub>6</sub>)<sup>[S1]</sup> and Cu(dap)<sub>2</sub>Cl<sup>[S2]</sup> were prepared as previously described.

Analytical thin layer chromatography (TLC) was performed on pre-coated silica gel 60 F254 plates. Visualization on TLC was achieved by the use of UV light (254 nm), exposure to treatment with acidic anisaldehyde, phosphomolybdic acid, ninhydrin, or ceric ammonium molybdate stain followed by heating. Silica-gel chromatography was performed using a CombiFlash® R<sub>f</sub><sup>+</sup> system with RediSep® R<sub>f</sub> Silica columns (230-400 mesh) using a proper eluent system. All products were characterized by appropriate techniques such as <sup>1</sup>H NMR, <sup>13</sup>C NMR, <sup>19</sup>F NMR, and HRMS analysis. <sup>1</sup>H, <sup>13</sup>C, and <sup>19</sup>F NMR spectra were recorded in CDCl<sub>3</sub> on Agilent Technologies DD2 (600 MHz) instrument. Chemical shifts were quoted in parts per million (ppm) referenced to the residual solvent peak or 0.0 ppm for tetramethylsilane. The following abbreviations were used to describe peak splitting patterns when appropriate: br = broad, s = singlet, d = doublet, t = triplet, q = quartet, dd = doublet of doublet, ddd = doublet of doublet of doublet and m = multiplet. Coupling constants, *J*, were reported in hertz (Hz). <sup>13</sup>C chemical shifts were reported in ppm referenced to the center of a triplet at 77.0 ppm of CDCl<sub>3</sub>. High resolution mass spectra were obtained by using EI method from Korea Basic Science Institute (Daegu) or ESI method from KAIST Research Analysis Center (Daejeon). Infrared (IR) spectra were acquired on Bruker Alpha ATR FT-IR Spectrometer. Frequencies are given in wave numbers (cm<sup>-1</sup>) and only selected peaks were reported. Melting point was measured with Buchi Melting Point M-565. Fluorescence emission spectra were collected on Shimadzu (RF-5301pc) Spectrofluorophotometer with excitation and emission slit width of 5.0 nm. Emission spectrum of 20 W CFL bulb was measured on HORIBA (model QM-400) spectrophotometer

## II. General Procedure for the Preparation of Benzoyl Azides<sup>[S3-S4]</sup>

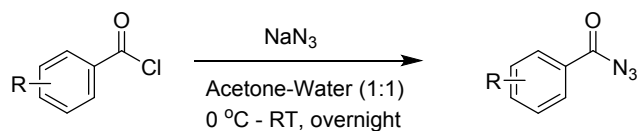

To a solution of benzoyl chloride (10 mmol) in acetone (10 mL), a solution of sodium azide (0.97 g, 15 mmol) in water (10 mL) was added dropwise (over 1 h) at 0 °C. The reaction mixture was warmed up to room temperature and stirred for overnight. After completion, acetone was removed under reduced pressure and the reaction mixture was extracted with EtOAc (10 mL x 3). The combined organic layers were dried over  $\text{MgSO}_4$  and solvent was removed under reduced pressure. The residue was purified using silica gel column chromatography (*n*-Hexane/EtOAc) to give the corresponding acyl azide.

## III. General Procedure for the Synthesis of *N*-Arylacrylamides<sup>[S5-S8]</sup>

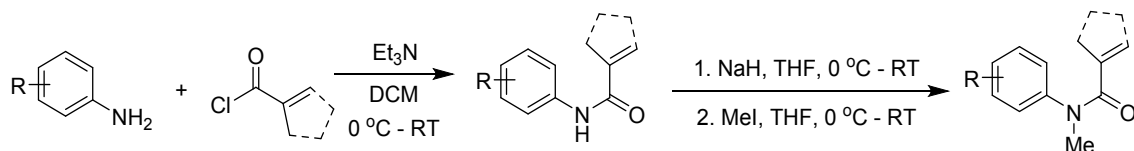

**Step 1:** Under nitrogen atmosphere, a 50 mL two neck round bottom flask containing dry  $\text{CH}_2\text{Cl}_2$  was charged with aromatic amine (5 mmol) and triethylamine (10 mmol). The resulting reaction mixture was cooled to 0 °C in ice bath for 15 min and then acryloyl chloride (7.5 mmol) was added via syringe at 0 °C. The reaction mixture was stirred at room temperature for overnight. After completion, the reaction was quenched with water and the product was extracted with

dichloromethane (10 mL x 3). The combined organic layers were dried over MgSO<sub>4</sub>, concentrated in vacuum, and the residue was subjected to column chromatography (*n*-Hexane/EtOAc) to give the corresponding amide.

**Step 2:** To the above prepared amide (3.0 mmol) in dry THF (15 mL) was added in portions NaH (94 mg, 3.9 mmol) at 0 °C. After stirring for 15 min at the same temperature, iodomethane (0.59 g, 4.2 mmol) was added and the mixture was stirred until completion at room temperature (monitored by TLC). After addition of water, the mixture was extracted with EtOAc (10 mL x 3). The combined organic layers were washed with brine, dried over MgSO<sub>4</sub> and the solvent was removed in vacuum. All synthesized *N*-arylacrylamide substrates are known and their <sup>1</sup>H NMR and <sup>13</sup>C NMR data matched those reported in the literature. [S5-S8]

#### IV. Reaction Setup

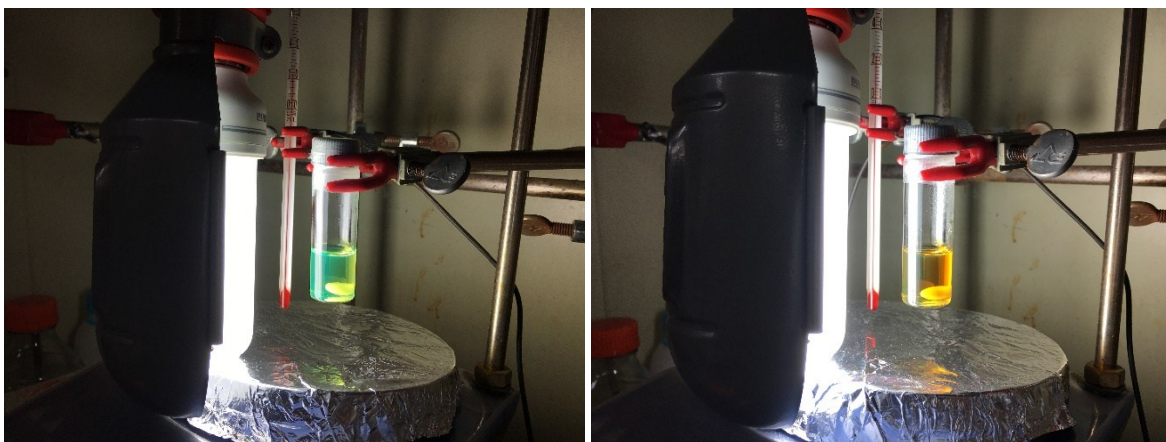

**Figure S-1.** Reaction setup: (left) before the reaction and (right) after the reaction.

## V. General Procedure for Aminoarylation of *N*-Aryl methacrylamides with Benzoyl Azides by Visible Light Photocatalysis

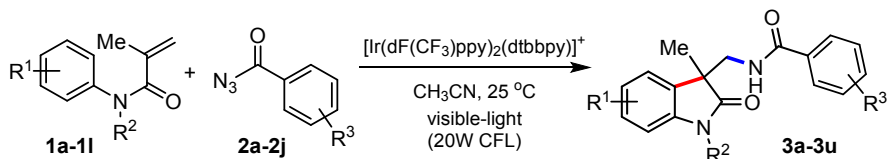

An oven-dried 5 mL borosilicate vial equipped with magnetic stirring bar was charged with substrate (0.20 mmol), benzoyl azide (0.30 mmol, 1.5 equiv),  $[\text{Ir}\{\text{dF}(\text{CF}_3)\text{ppy}\}_2(\text{dtbbpy})]\text{PF}_6$  (5.6 mg, 2.5 mol %), and MeCN (1.5 mL). The resulting solution was degassed by three freeze-pump-thaw cycles. After the reaction mixture was thoroughly degassed, the vial was positioned approximately 3 cm from a 20 W compact fluorescent lamp. The reaction was stirred at  $25\text{ }^\circ\text{C}$  for 36 h under argon atmosphere. After completion, the pressure inside the vial was released by a syringe needle and the reaction mixture was diluted with  $\text{CH}_2\text{Cl}_2$ . The combined organic layers were concentrated under reduced pressure. The residue was purified by flash chromatography on silica gel (*n*-Hexane/EtOAc) to afford the products.

### Characterization data of products (Table 2)

#### *N*-[(1,3-Dimethyl-2-oxindolin-3-yl)methyl]-4-methoxybenzamide (Table 2, 3a)

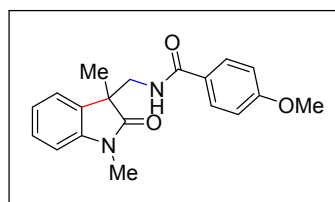

Colorless solid; m.p.  $125\text{--}126\text{ }^\circ\text{C}$ ;  $R_f = 0.26$  (1/1, *n*-Hexane/EtOAc);  $^1\text{H NMR}$  (600 MHz,  $\text{CDCl}_3$ )  $\delta$  7.77 (d,  $J = 8.7$  Hz, 2H), 7.31 (t,  $J = 6.8$  Hz, 2H), 7.23 (d,  $J = 7.2$  Hz, 1H), 7.11 (t,  $J = 7.5$  Hz, 1H), 6.92 (d,  $J = 8.7$  Hz, 2H), 6.88 (d,  $J = 8.0$  Hz, 1H), 4.23 (dd,  $J = 13.5, 8.5$  Hz, 1H), 3.84 (s, 3H), 3.24 (s, 3H), 3.21 (dd,  $J = 13.5, 2.7$  Hz, 1H), 1.45 (s, 3H);  $^{13}\text{C NMR}$  (150 MHz,  $\text{CDCl}_3$ )  $\delta$  180.3, 167.0, 162.2, 142.8, 132.1, 128.7, 128.5, 126.6, 123.1, 123.0, 113.7, 108.3, 55.4, 47.2, 45.1, 26.2, 20.2; **IR** ( $\text{cm}^{-1}$ ) 3313, 3056, 2919, 2833, 1693, 1656, 1606, 1542, 1493, 1454, 1375, 1309, 1245, 1177, 1028, 835, 751, 661; **HRMS** (EI)  $m/z$  calculated for  $\text{C}_{19}\text{H}_{20}\text{N}_2\text{O}_3$   $[\text{M}]^+$ : 324.1474; found 324.1476.

#### 4-(*tert*-Butyl)-*N*-[(1,3-dimethyl-2-oxoindolin-3-yl)methyl]benzamide (Table 2, 3b)

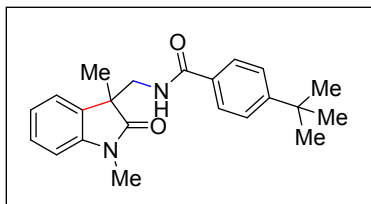

Colorless solid; m.p. 131-132 °C;  $R_f = 0.50$  (1/1, *n*-Hexane/EtOAc);  $^1\text{H NMR}$  (600 MHz,  $\text{CDCl}_3$ )  $\delta$  7.73 (d,  $J = 8.3$  Hz, 2H), 7.44 (d,  $J = 8.3$  Hz, 2H), 7.30 (t,  $J = 7.5$  Hz, 2H), 7.25 (s, 1H), 7.11 (t,  $J = 7.5$  Hz, 1H), 6.88 (d,  $J = 7.9$  Hz, 1H), 4.22 (dd,  $J = 13.5, 8.3$  Hz, 1H), 3.26 (d,  $J = 2.7$  Hz, 1H), 3.24 (s, 3H), 1.45 (s, 3H), 1.32 (s, 9H);  $^{13}\text{C NMR}$  (150 MHz,  $\text{CDCl}_3$ )  $\delta$  180.2, 167.4, 154.9, 142.8, 132.1, 131.5, 128.5, 126.8, 125.5, 123.1, 123.0, 108.3, 47.3, 45.0, 34.9, 31.1, 26.2, 20.2; **IR** ( $\text{cm}^{-1}$ ) 3336, 2962, 2924, 2864, 1681, 1662, 1611, 1536, 1493, 1423, 1351, 1288, 1125, 1021, 931, 858, 750, 636; **HRMS** (EI)  $m/z$  calculated for  $\text{C}_{22}\text{H}_{26}\text{N}_2\text{O}_2$   $[\text{M}]^+$ : 350.1994; found: 350.1995.

#### *N*-[(1,3-Dimethyl-2-oxoindolin-3-yl)methyl]benzamide (Table 2, 3c)

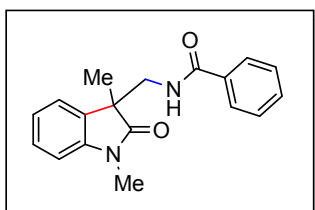

Colorless solid; m.p. 123-124 °C;  $R_f = 0.35$  (1/1, *n*-Hexane/EtOAc);  $^1\text{H NMR}$  (600 MHz,  $\text{CDCl}_3$ )  $\delta$  7.80 (d,  $J = 7.3$  Hz, 2H), 7.49 (t,  $J = 7.4$  Hz, 1H), 7.43 (t,  $J = 7.5$  Hz, 2H), 7.31 (t,  $J = 7.0$  Hz, 3H), 7.12 (t,  $J = 7.5$  Hz, 1H), 6.89 (d,  $J = 7.7$  Hz, 1H), 4.24 (dd,  $J = 13.5, 8.4$  Hz, 1H), 3.25 (s, 3H), 3.24 (dd,  $J = 13.5, 8.4$  Hz, 1H), 1.47 (s, 3H);  $^{13}\text{C NMR}$  (150 MHz,  $\text{CDCl}_3$ )  $\delta$  180.3, 167.5, 142.8, 134.3, 132.0, 131.5, 128.6, 128.5, 126.9, 123.8, 123.0, 108.4, 47.2, 45.1, 26.2, 20.2; **IR** ( $\text{cm}^{-1}$ ) 3397, 3301, 3046, 3017, 2967, 2923, 1708, 1635, 1610, 1527, 1488, 1339, 1287, 1124, 1061, 930, 749, 712, 690; **HRMS** (EI)  $m/z$  calculated for  $\text{C}_{18}\text{H}_{18}\text{N}_2\text{O}_2$   $[\text{M}]^+$ : 294.1368; found: 294.1370.

#### 4-Chloro-*N*-[(1,3-dimethyl-2-oxoindolin-3-yl)methyl]benzamide (Table 2, 3d)

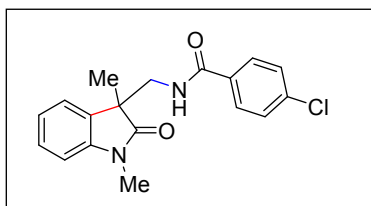

Colorless solid; m.p. 133-134 °C;  $R_f = 0.42$  (1/1, *n*-Hexane/EtOAc);  $^1\text{H NMR}$  (600 MHz,  $\text{CDCl}_3$ )  $\delta$  7.74 (d,  $J = 8.5$  Hz, 2H), 7.39 (d,  $J = 8.6$  Hz, 2H), 7.36 (d,  $J = 7.1$  Hz, 1H), 7.33 – 7.29 (m, 2H), 7.12 (td,  $J = 7.5, 1.0$  Hz, 1H), 6.89 (d,  $J = 7.7$  Hz,

1H), 4.23 (dd,  $J = 13.5, 8.4$  Hz, 1H), 3.24 (s, 3H), 3.20 (dd,  $J = 13.5, 2.7$  Hz, 1H), 1.45 (s, 3H);  $^{13}\text{C}$  NMR (150 MHz,  $\text{CDCl}_3$ )  $\delta$  180.3, 166.4, 142.8, 137.7, 132.7, 131.9, 128.8, 128.6, 128.4, 123.2, 122.9, 108.4, 47.0, 45.2, 26.2, 20.2; IR ( $\text{cm}^{-1}$ ) 3319, 2967, 2917, 1681, 1663, 1609, 1539, 1486, 1423, 1385, 1350, 1291, 1090, 1012, 909, 848, 752, 734, 650; HRMS (EI)  $m/z$  calculated for  $\text{C}_{18}\text{H}_{17}\text{ClN}_2\text{O}_2$   $[\text{M}]^+$ : 328.0979; found: 328.0978.

#### 4-Bromo-*N*-[(1,3-dimethyl-2-oxindolin-3-yl)methyl]benzamide (Table 2, 3e)

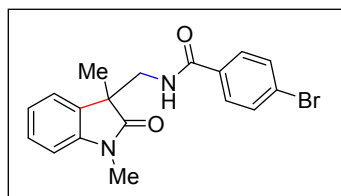

Colorless solid; m.p. 139-140 °C;  $R_f = 0.46$  (1/1, *n*-Hexane/EtOAc);  $^1\text{H}$  NMR (600 MHz,  $\text{CDCl}_3$ )  $\delta$  7.68 (d,  $J = 8.5$  Hz, 2H), 7.57 (d,  $J = 8.6$  Hz, 2H), 7.36 (d,  $J = 7.4$  Hz, 1H), 7.35 – 7.29 (m, 2H), 7.13 (t,  $J = 7.5$  Hz, 1H), 6.89 (d,  $J = 7.6$  Hz, 1H), 4.24 (dd,  $J = 13.5, 8.4$  Hz, 1H), 3.25 (s, 3H), 3.20 (dd,  $J = 13.6, 2.6$  Hz, 1H), 1.46 (s, 3H);  $^{13}\text{C}$  NMR (150 MHz,  $\text{CDCl}_3$ )  $\delta$  180.3, 166.5, 142.7, 133.1, 131.9, 131.8, 128.6, 126.2, 123.2, 123.0, 108.4, 47.0, 45.2, 26.3, 20.2; IR ( $\text{cm}^{-1}$ ) 3324, 3056, 2969, 2916, 1666, 1611, 1589, 1540, 1471, 1425, 1384, 1289, 1102, 1067, 1008, 991, 847, 750, 697; HRMS (EI)  $m/z$  calculated for  $\text{C}_{18}\text{H}_{17}\text{BrN}_2\text{O}_2$   $[\text{M}]^+$ : 372.0473; found: 372.0476.

#### Methyl-4-[(1,3-dimethyl-2-oxindolin-3-yl)methyl]carbamoyl}benzoate (Table 2, 3f)

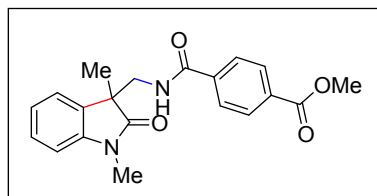

Colorless solid; m.p. 143-145 °C;  $R_f = 0.29$  (1/1, *n*-Hexane/EtOAc);  $^1\text{H}$  NMR (600 MHz,  $\text{CDCl}_3$ )  $\delta$  8.08 (d,  $J = 8.3$  Hz, 2H), 7.84 (d,  $J = 8.3$  Hz, 2H), 7.43 (d,  $J = 7.2$  Hz, 1H), 7.30 (d,  $J = 7.5$  Hz, 2H), 7.12 (t,  $J = 7.5$  Hz, 1H), 6.89 (d,  $J = 7.6$  Hz, 1H), 4.24 (dd,  $J = 13.5, 8.4$  Hz, 1H), 3.92 (s, 3H), 3.24 (s, 3H), 3.21 (dd,  $J = 2.5$  Hz, 1H), 1.46 (s, 3H);  $^{13}\text{C}$  NMR (150 MHz,  $\text{CDCl}_3$ )  $\delta$  180.2, 166.6, 166.3, 142.7, 138.1, 132.7, 131.9, 129.8, 128.6, 127.0, 123.2, 123.0, 108.5, 52.3, 47.1, 45.2, 26.3, 20.3; IR ( $\text{cm}^{-1}$ ) 3314, 3054, 2969, 2928, 2869, 1697, 1611, 1534, 1492, 1469, 1379, 1349, 1275, 1106, 1017, 729.66; HRMS (ESI)  $m/z$  calculated for  $\text{C}_{20}\text{H}_{20}\text{N}_2\text{NaO}_4$   $[\text{M}+\text{Na}]^+$ : 375.1321; found: 375.1322.



***N*-[(1,3-Dimethyl-2-oxoindolin-3-yl)methyl]-4-(trifluoromethyl)benzamide (Table 2, 3g)**

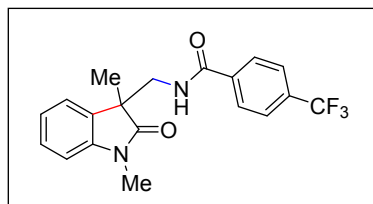

Colorless solid; m.p. 134-135 °C;  $R_f$  = 0.46 (1/1, *n*-Hexane/EtOAc);  $^1\text{H NMR}$  (600 MHz,  $\text{CDCl}_3$ )  $\delta$  7.91 (d,  $J$  = 8.0 Hz, 2H), 7.69 (d,  $J$  = 8.1 Hz, 2H), 7.46 (d,  $J$  = 7.7 Hz, 1H), 7.35-7.28 (m, 2H), 7.13 (t,  $J$  = 7.5 Hz, 1H), 6.90 (d,  $J$  = 7.7 Hz, 1H), 4.25 (dd,  $J$  = 13.5, 8.4 Hz, 1H), 3.25 (s, 3H), 3.23 (dd,  $J$  = 13.5, 2.7 Hz, 1H), 1.46 (s, 3H);  $^{19}\text{F NMR}$  (564 MHz,  $\text{CDCl}_3$ )  $\delta$  -62.9;  $^{13}\text{C NMR}$  (150 MHz,  $\text{CDCl}_3$ )  $\delta$  180.2, 166.1, 142.8, 137.5, 133.2 (q,  $J$  = 33.2 Hz), 131.9, 128.6, 127.4, 125.6 (q,  $J$  = 3.7 Hz), 123.6 (q,  $J$  = 271.8 Hz), 123.2, 122.9, 108.5, 46.9, 45.2, 26.2, 20.3; **IR** ( $\text{cm}^{-1}$ ) 3353, 3062, 2964, 2904, 1696, 1665, 1608, 1544, 1493, 1381, 1327, 1290, 1159, 1109, 1065, 1016, 855, 742, 696; **HRMS** (EI)  $m/z$  calculated for  $\text{C}_{19}\text{H}_{17}\text{F}_3\text{N}_2\text{O}_2$   $[\text{M}]^+$ : 362.1242; found: 362.1245.

**4-Cyano-*N*-[(1,3-dimethyl-2-oxoindolin-3-yl)methyl]benzamide (Table 2, 3h)**

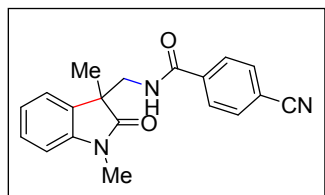

Yellow solid; m.p. 152-153 °C;  $R_f$  = 0.28 (1/1, *n*-Hexane/EtOAc);  $^1\text{H NMR}$  (600 MHz,  $\text{CDCl}_3$ )  $\delta$  7.90 (d,  $J$  = 8.3 Hz, 2H), 7.72 (d,  $J$  = 8.3 Hz, 2H), 7.54 (d,  $J$  = 6.7 Hz, 1H), 7.35 – 7.27 (m, 2H), 7.13 (t,  $J$  = 7.4 Hz, 1H), 6.90 (d,  $J$  = 7.8 Hz, 1H), 4.24 (dd,  $J$  = 13.6, 8.4 Hz, 1H), 3.24 (s, 3H), 3.20 (dd,  $J$  = 13.6, 2.6 Hz, 1H), 1.45 (s, 3H);  $^{13}\text{C NMR}$  (150 MHz,  $\text{CDCl}_3$ )  $\delta$  180.2, 165.7, 142.7, 138.1, 132.4, 131.8, 128.7, 127.7, 123.3, 122.9, 118.0, 115.1, 108.6, 46.9, 45.3, 26.3, 20.3; **IR** ( $\text{cm}^{-1}$ ) 3298, 3061, 2971, 2933, 2873, 2225, 1682, 1656, 1612, 1548, 1493, 1457, 1382, 1339, 1299, 1105, 921, 855, 717, 636; **HRMS** (EI)  $m/z$  calculated for  $\text{C}_{19}\text{H}_{17}\text{N}_3\text{O}_2$   $[\text{M}]^+$ : 319.1321; found: 319.1322.

***N*-[(1,3-Dimethyl-2-oxoindolin-3-yl)methyl]-3,5-dimethylbenzamide (Table 2, 3i)**

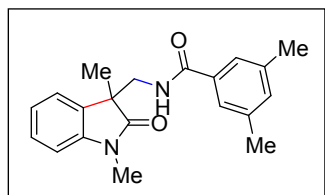

Colorless solid; m.p. 157-159 °C;  $R_f$  = 0.44 (1/1, *n*-Hexane/EtOAc);  $^1\text{H NMR}$  (600 MHz,  $\text{CDCl}_3$ )  $\delta$  7.38 (s, 2H), 7.33-7.26 (m, 2H), 7.21 (d,  $J$  = 6.4 Hz, 1H), 7.14 – 7.06 (m, 2H), 6.87 (d,  $J$  = 7.7 Hz, 1H), 4.21 (dd,  $J$  = 13.5, 8.4 Hz, 1H), 3.24 (dd,  $J$  = 12.0 Hz, 8.4 Hz, 1H), 3.23 (s,

3H), 2.34 (s, 6H), 1.45 (s, 3H);  $^{13}\text{C}$  NMR (150 MHz,  $\text{CDCl}_3$ )  $\delta$  180.3, 167.9, 142.8, 138.2, 134.3, 133.1, 132.1, 128.5, 124.7, 123.1, 123.1, 108.3, 47.4, 45.1, 26.2, 21.2, 20.2; IR ( $\text{cm}^{-1}$ ) 3344, 3053, 2924, 1683, 1661, 1612, 1532, 1493, 1473, 1450, 1426, 1351, 1317, 1243, 1122, 932, 870, 749, 689; HRMS (EI)  $m/z$  calculated for  $\text{C}_{20}\text{H}_{22}\text{N}_2\text{O}_2$   $[\text{M}]^+$ : 322.1681; found: 322.1679.

### 3,5-Dichloro-*N*-[(1,3-dimethyl-2-oxoindolin-3-yl)methyl]benzamide (Table 2, 3j)

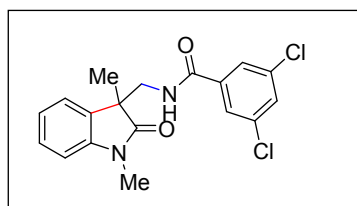

Colorless solid; m.p. 202-203 °C;  $R_f$  = 0.61 (1/1, *n*-Hexane/EtOAc);  $^1\text{H}$  NMR (600 MHz,  $\text{CDCl}_3$ )  $\delta$  7.64 (s, 2H), 7.46 (s, 1H), 7.37 – 7.27 (m, 3H), 7.12 (t,  $J$  = 7.5 Hz, 1H), 6.89 (d,  $J$  = 7.8 Hz, 1H), 4.19 (dd,  $J$  = 13.5, 8.2 Hz, 1H), 3.25 (s, 3H), 3.22 (s, 1H), 1.45 (s, 3H);  $^{13}\text{C}$  NMR (150 MHz,  $\text{CDCl}_3$ )  $\delta$  180.2, 164.9, 142.8, 137.2, 135.4, 131.7, 131.4, 128.7, 125.6, 123.3, 123.0, 108.5, 47.0, 45.3, 26.3, 20.3; IR ( $\text{cm}^{-1}$ ) 3322, 3066, 2975, 2921, 1687, 1664, 1612, 1541, 1494, 1469, 1427, 1385, 1346, 1288, 1117, 874, 796, 754, 672; HRMS (EI)  $m/z$  calculated for  $\text{C}_{18}\text{H}_{16}\text{Cl}_2\text{N}_2\text{O}_2$   $[\text{M}]^+$ : 362.0589; found: 362.0592.

### *N*-[(1-Ethyl-3-methyl-2-oxoindolin-3-yl)methyl]-4-methoxybenzamide (Table 2, 3k)

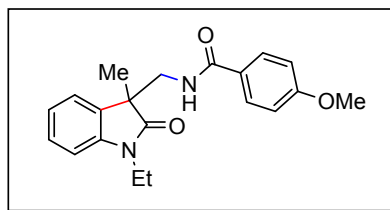

Colorless solid; m.p. 104-105 °C;  $R_f$  = 0.30 (1/1, *n*-Hexane/EtOAc);  $^1\text{H}$  NMR (600 MHz,  $\text{CDCl}_3$ )  $\delta$  7.75 (d,  $J$  = 8.8 Hz, 2H), 7.31-7.26 (m, 2H), 7.23 (d,  $J$  = 6.9 Hz, 1H), 7.08 (t,  $J$  = 7.9 Hz, 1H), 6.92-6.84 (m, 3H), 4.20 (dd,  $J$  = 13.5, 8.4 Hz, 1H), 3.81 (s, 3H), 3.77 (q,  $J$  = 7.2 Hz, 2H), 3.21 (dd,  $J$  = 13.5, 2.8 Hz, 1H), 1.43 (s, 3H), 1.26 (s, 3H);  $^{13}\text{C}$  NMR (150 MHz,  $\text{CDCl}_3$ )  $\delta$  179.9, 166.9, 162.2, 141.9, 132.3, 128.7, 128.4, 126.6, 123.2, 122.9, 113.7, 108.5, 55.3, 47.2, 45.1, 34.7, 20.2, 12.7; IR ( $\text{cm}^{-1}$ ) 3322, 3047, 2975, 2929, 2833, 1689, 1654, 1604, 1540, 1503, 1466, 1366, 1307, 1245, 1174, 1108, 1024, 992, 836, 748, 606; HRMS (EI)  $m/z$  calculated for  $\text{C}_{20}\text{H}_{22}\text{N}_2\text{O}_3$   $[\text{M}]^+$ : 338.1630; found: 338.1627.

### ***N*-[(1-Benzyl-3-methyl-2-oxoindolin-3-yl)methyl]-4-methoxybenzamide (Table 2, 3l)**

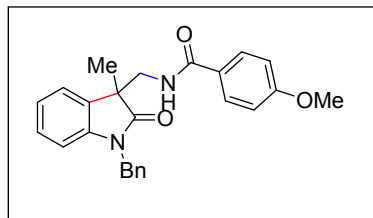

Colorless solid; m.p. 129-130 °C;  $R_f = 0.40$  (1/1, *n*-Hexane/EtOAc);  $^1\text{H NMR}$  (600 MHz,  $\text{CDCl}_3$ )  $\delta$  7.71 (d,  $J = 8.8$  Hz, 2H), 7.32 (d,  $J = 7.4$  Hz, 1H), 7.27 (s, 5H), 7.19 (t,  $J = 7.4$  Hz, 1H), 7.07 (t,  $J = 7.5$  Hz, 2H), 6.89 (d,  $J = 8.8$  Hz, 2H), 6.78 (d,  $J = 7.8$  Hz, 1H), 4.97 (d,  $J = 15.7$  Hz, 1H), 4.89 (d,  $J = 15.7$  Hz, 1H), 4.24 (dd,  $J = 13.5, 8.2$  Hz, 1H), 3.83 (s, 3H), 3.38 (dd,  $J = 13.5, 3.1$  Hz, 1H), 1.51 (s, 3H);  $^{13}\text{C NMR}$  (150 MHz,  $\text{CDCl}_3$ )  $\delta$  180.4, 166.9, 162.2, 141.9, 135.6, 132.0, 128.8, 128.8, 128.4, 127.7, 127.1, 126.5, 123.2, 123.1, 113.7, 109.3, 55.4, 47.6, 45.2, 43.7, 20.5; **IR** ( $\text{cm}^{-1}$ ) 3361, 2993, 2928, 2842, 1709, 1653, 1605, 1544, 1502, 1452, 1383, 1349, 1288, 1247, 1179, 1108, 1028, 845, 742, 610; **HRMS** (EI)  $m/z$  calculated for  $\text{C}_{25}\text{H}_{24}\text{N}_2\text{O}_3$   $[\text{M}]^+$ : 400.1787; found: 400.1786.

### **4-Methoxy-*N*-[(3-methyl-2-oxo-1-phenylindolin-3-yl)methyl]benzamide (Table 2, 3m)**

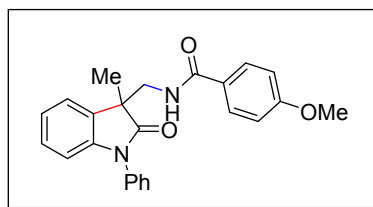

Colorless solid; m.p. 125-126 °C;  $R_f = 0.40$  (1/1, *n*-Hexane/EtOAc);  $^1\text{H NMR}$  (600 MHz,  $\text{CDCl}_3$ )  $\delta$  7.78 (d,  $J = 8.7$  Hz, 2H), 7.54 (t,  $J = 7.7$  Hz, 2H), 7.42 (t,  $J = 9.7$  Hz, 3H), 7.38 (d,  $J = 7.3$  Hz, 1H), 7.23 (d,  $J = 7.4$  Hz, 2H), 7.15 (t,  $J = 7.4$  Hz, 1H), 6.89 (d,  $J = 8.7$  Hz, 2H), 6.86 (d,  $J = 7.8$  Hz, 1H), 4.34 (dd,  $J = 13.6, 8.5$  Hz, 1H), 3.82 (s, 3H), 3.37 (dd,  $J = 13.6, 2.7$  Hz, 1H), 1.58 (s, 3H);  $^{13}\text{C NMR}$  (150 MHz,  $\text{CDCl}_3$ )  $\delta$  179.9, 167.0, 162.2, 142.8, 134.0, 131.9, 129.7, 128.8, 128.4, 128.3, 126.5, 126.4, 123.6, 123.3, 113.7, 109.7, 55.4, 47.5, 45.3, 20.5; **IR** ( $\text{cm}^{-1}$ ) 3354, 3061, 2987, 2927, 2837, 2231, 1692, 1642, 1605, 1545, 1504, 1465, 1371, 1327, 1290, 1251, 1177, 1024, 926, 844, 741, 697; **HRMS** (EI)  $m/z$  calculated for  $\text{C}_{24}\text{H}_{22}\text{N}_2\text{O}_3$   $[\text{M}]^+$ : 386.1630; found: 386.1632.

#### 4-Methoxy-*N*-[(5-methoxy-1,3-dimethyl-2-oxoindolin-3-yl)methyl]benzamide (Table 2, 3n)

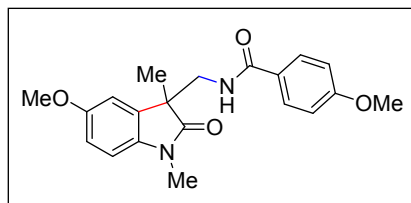

Colorless solid; m.p. 130-131 °C;  $R_f = 0.19$  (1/1, *n*-Hexane/EtOAc);  $^1\text{H NMR}$  (600 MHz,  $\text{CDCl}_3$ )  $\delta$  7.79 (d,  $J = 8.3$  Hz, 2H), 7.31 (d,  $J = 8.5$  Hz, 1H), 6.96 – 6.88 (m, 3H), 6.83 (d,  $J = 8.4$  Hz, 1H), 6.78 (d,  $J = 8.4$  Hz, 1H), 4.24 (dd,  $J = 13.5, 8.6$  Hz, 1H), 3.84 (s, 3H), 3.80 (s, 3H), 3.22 (s, 3H), 3.16 (dd,  $J = 13.5, 2.4$  Hz, 1H), 1.44 (s, 3H);  $^{13}\text{C NMR}$  (150 MHz,  $\text{CDCl}_3$ )  $\delta$  180.0, 167.0, 162.2, 156.4, 136.1, 133.4, 128.8, 126.6, 113.7, 113.1, 110.1, 108.8, 55.9, 55.4, 47.5, 45.1, 26.3, 20.2; **IR** ( $\text{cm}^{-1}$ ) 3326, 3063, 2924, 2839, 1679, 1655, 1603, 1545, 1498, 1457, 1433, 1366, 1307, 1250, 1215, 1174, 1125, 1026, 905, 845, 815, 768, 729, 694; **HRMS** (EI)  $m/z$  calculated for  $\text{C}_{20}\text{H}_{22}\text{N}_2\text{O}_4$   $[\text{M}]^+$ : 354.1580; found: 354.1582.

#### 4-Methoxy-*N*-[(1,3,5-trimethyl-2-oxoindolin-3-yl)methyl]benzamide (Table 2, 3o)

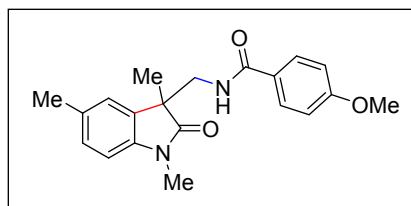

Yellow solid; m.p. 133-134 °C;  $R_f = 0.35$  (1/1, *n*-Hexane/EtOAc);  $^1\text{H NMR}$  (600 MHz,  $\text{CDCl}_3$ )  $\delta$  7.78 (d,  $J = 8.7$  Hz, 2H), 7.29 (d,  $J = 7.6$  Hz, 1H), 7.11 (s, 1H), 7.09 (d,  $J = 7.9$  Hz, 1H), 6.91 (d,  $J = 8.7$  Hz, 2H), 6.76 (d,  $J = 7.8$  Hz, 1H), 4.23 (dd,  $J = 13.5, 8.6$  Hz, 1H), 3.83 (s, 3H), 3.21 (s, 3H), 3.14 (dd,  $J = 13.5, 2.4$  Hz, 1H), 2.34 (s, 3H), 1.43 (s, 3H);  $^{13}\text{C NMR}$  (150 MHz,  $\text{CDCl}_3$ )  $\delta$  180.3, 167.0, 162.2, 140.4, 132.8, 132.2, 128.8, 128.7, 126.7, 123.8, 113.7, 108.1, 55.4, 47.1, 45.1, 26.2, 21.1, 20.2; **IR** ( $\text{cm}^{-1}$ ) 3365, 2963, 2925, 2867, 1692, 1603, 1536, 1496, 1351, 1248, 1176, 1110, 1026, 842, 806, 765, 728; **HRMS** (EI)  $m/z$  calculated for  $\text{C}_{20}\text{H}_{22}\text{N}_2\text{O}_3$   $[\text{M}]^+$ : 338.1630; found: 338.1628.

#### *N*-[(5-Chloro-1,3-dimethyl-2-oxoindolin-3-yl)methyl]-4-methoxybenzamide (Table 2, 3p)

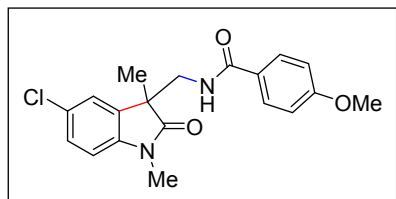

Colorless solid; m.p. 164-165 °C;  $R_f = 0.27$  (1/1, *n*-Hexane/EtOAc);  $^1\text{H NMR}$  (600 MHz,  $\text{CDCl}_3$ )  $\delta$  7.76 (d,  $J = 7.2$  Hz, 2H), 7.28 (t,  $J = 7.6$  Hz, 2H), 7.12 (s, 1H), 6.91 (d,  $J = 7.7$  Hz, 2H), 6.79 (t,  $J = 7.0$  Hz, 1H), 4.20 (dd,  $J = 13.3, 7.7$  Hz, 1H),

3.83 (s, 3H), 3.20 (d,  $J = 14.8$  Hz, 4H), 1.45 (s, 3H);  $^{13}\text{C NMR}$  (150 MHz,  $\text{CDCl}_3$ )  $\delta$  179.8, 167.0, 162.3, 141.4, 133.8, 128.8, 128.6, 128.4, 126.5, 123.7, 113.8, 109.3, 55.4, 47.6, 44.9, 26.3, 20.1; **IR** ( $\text{cm}^{-1}$ ) 3361, 3311, 3065, 2969, 2927, 1700, 1653, 1606, 1542, 1488, 1339, 1248, 1168, 1029, 834, 770, 660; **HRMS** (EI)  $m/z$  calculated for  $\text{C}_{19}\text{H}_{19}\text{ClN}_2\text{O}_3$   $[\text{M}]^+$ : 358.1084; found: 358.1085.

***N*-[(5-Bromo-1,3-dimethyl-2-oxindolin-3-yl)methyl]-4-methoxybenzamide (Table 2, 3q)**

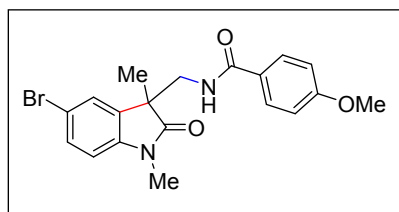

Colorless solid; m.p. 166-167 °C;  $R_f = 0.26$  (1/1, *n*-Hexane/EtOAc);  $^1\text{H NMR}$  (600 MHz,  $\text{CDCl}_3$ )  $\delta$  7.77 (d,  $J = 8.8$  Hz, 2H), 7.44 (d,  $J = 9.9$  Hz, 2H), 7.12 (d,  $J = 7.2$  Hz, 1H), 6.93 (d,  $J = 8.8$  Hz, 2H), 6.76 (d,  $J = 8.1$  Hz, 1H), 4.22 (dd,  $J = 13.5$ , 8.5 Hz, 1H), 3.85 (s, 3H), 3.23 (s, 3H), 3.20 (dd,  $J = 13.6$ , 2.6 Hz, 1H), 1.45 (s, 3H);  $^{13}\text{C NMR}$  (150 MHz,  $\text{CDCl}_3$ )  $\delta$  179.7, 167.0, 162.3, 141.9, 134.1, 131.4, 128.8, 126.5, 115.9, 113.8, 109.8, 55.4, 47.5, 44.9, 26.3, 20.1; **IR** ( $\text{cm}^{-1}$ ) 3365, 3315, 3057, 2925, 1699, 1652, 1605, 1540, 1486, 1248, 1169, 1029, 832, 770; **HRMS** (EI)  $m/z$  calculated for  $\text{C}_{19}\text{H}_{19}\text{BrN}_2\text{O}_3$   $[\text{M}]^+$ : 402.0579; found: 402.0581.

***N*-{[1,3-Dimethyl-2-oxo-5-(trifluoromethyl)indolin-3-yl]methyl}-4-methoxybenzamide (Table 2, 3r)**

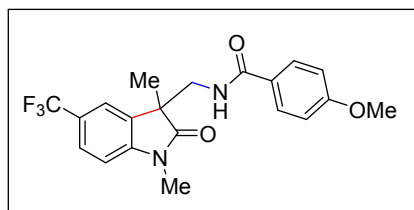

Colorless solid; m.p. 135-136 °C;  $R_f = 0.30$  (1/1, *n*-Hexane/EtOAc);  $^1\text{H NMR}$  (600 MHz,  $\text{CDCl}_3$ )  $\delta$  7.76 (d,  $J = 8.8$  Hz, 2H), 7.59 (d,  $J = 8.2$  Hz, 1H), 7.56 (s, 1H), 7.09 (d,  $J = 6.9$  Hz, 1H), 6.95 (d,  $J = 8.1$  Hz, 1H), 6.92 (d,  $J = 8.7$  Hz, 2H), 4.24 (dd,  $J = 13.6$ , 8.5 Hz, 1H), 3.84 (s, 3H), 3.27 (s, 3H), 3.24 (dd,  $J = 13.6$ , 2.9 Hz, 1H), 1.48 (s, 3H);  $^{19}\text{F NMR}$  (564 MHz,  $\text{CDCl}_3$ )  $\delta$  -61.5;  $^{13}\text{C NMR}$  (150 MHz,  $\text{CDCl}_3$ )  $\delta$  180.2, 167.0, 162.3, 145.8, 132.7, 128.7, 126.4, 126.3 (q,  $J = 4.0$  Hz), 125.3, 123.3, 120.25 (q,  $J = 4.5$  Hz), 113.8, 108.1, 55.4, 47.5, 44.8, 26.4, 20.0; **IR** ( $\text{cm}^{-1}$ ) 3358, 2996, 2940, 2925, 2847, 1698, 1653, 1606, 1539, 1502, 1326, 1291, 1252, 1159, 1112, 1065, 1027, 896, 847, 819, 770, 748, 726, 610; **HRMS** (EI)  $m/z$  calculated for  $\text{C}_{20}\text{H}_{19}\text{F}_3\text{N}_2\text{O}_3$   $[\text{M}]^+$ : 392.1348; found: 392.1351.

#### 4-Methoxy-*N*-[(1,3,7-trimethyl-2-oxoindolin-3-yl)methyl]benzamide (Table 2, 3s)

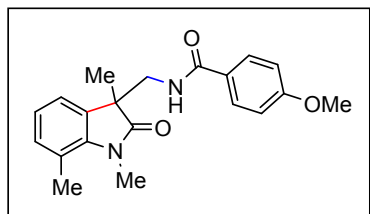

Light brown solid; m.p. 140-141 °C;  $R_f = 0.27$  (1/1, *n*-Hexane/EtOAc);  $^1\text{H NMR}$  (600 MHz,  $\text{CDCl}_3$ )  $\delta$  7.79 (d,  $J = 8.7$  Hz, 2H), 7.30 (d,  $J = 7.6$  Hz, 1H), 7.13 (d,  $J = 7.1$  Hz, 1H), 7.02 (d,  $J = 7.5$  Hz, 1H), 6.99 (t,  $J = 7.4$  Hz, 1H), 6.92 (d,  $J = 8.7$  Hz, 2H), 4.21 (dd,  $J = 13.5, 8.6$  Hz, 1H), 3.83 (s, 3H), 3.51 (s, 3H), 3.13 (dd,  $J = 13.5, 2.4$  Hz, 1H), 2.58 (s, 3H), 1.42 (s, 3H);  $^{13}\text{C NMR}$  (150 MHz,  $\text{CDCl}_3$ )  $\delta$  181.1, 166.9, 162.2, 140.5, 132.8, 132.2, 128.8, 126.7, 123.0, 120.9, 120.0, 113.7, 55.4, 46.4, 45.3, 29.5, 20.5, 18.9; **IR** ( $\text{cm}^{-1}$ ) 3233, 3052, 3009, 2968, 2921, 1698, 1636, 1601, 1555, 1504, 1457, 1354, 1308, 1252, 1171, 1076, 1023, 908, 842, 734, 699; **HRMS** (EI)  $m/z$  calculated for  $\text{C}_{20}\text{H}_{22}\text{N}_2\text{O}_3$   $[\text{M}]^+$ : 338.1630; found: 338.1632.

#### *N*-[(1,3-Dimethyl-2-oxo-7-phenylindolin-3-yl)methyl]-4-methoxybenzamide (Table 2, 3t)

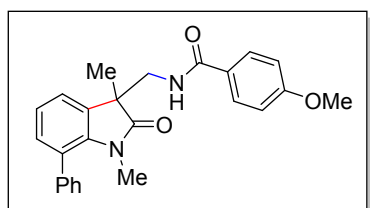

Colorless solid; m.p. 145-146 °C;  $R_f = 0.38$  (1/1, *n*-Hexane/EtOAc);  $^1\text{H NMR}$  (600 MHz,  $\text{CDCl}_3$ )  $\delta$  7.80 (d,  $J = 8.8$  Hz, 2H), 7.43 – 7.38 (m, 3H), 7.37 – 7.26 (m, 4H), 7.15 – 7.09 (m, 2H), 6.93 (d,  $J = 8.8$  Hz, 2H), 4.27 (dd,  $J = 13.5, 8.5$  Hz, 1H), 3.85 (s, 3H), 3.24 (dd,  $J = 13.5, 2.5$  Hz, 1H), 2.76 (s, 3H), 1.50 (s, 3H);  $^{13}\text{C NMR}$  (150 MHz,  $\text{CDCl}_3$ )  $\delta$  181.3, 167.0, 162.2, 139.6, 138.6, 133.1, 131.5, 129.8, 128.8, 127.8, 127.8, 126.7, 125.8, 122.4, 122.0, 113.8, 55.4, 46.5, 45.4, 30.1, 20.5; **IR** ( $\text{cm}^{-1}$ ) 3269, 2970, 2929, 2839, 1697, 1636, 1608, 1546, 1506, 1441, 1299, 1253, 1176, 1107, 1063, 1025, 838, 765, 752, 700, 630; **HRMS** (EI)  $m/z$  calculated for  $\text{C}_{25}\text{H}_{24}\text{N}_2\text{O}_3$   $[\text{M}]^+$ : 400.1787; found: 400.1784.

#### 4-Methoxy-*N*-[(1,3,4,6-tetramethyl-2-oxoindolin-3-yl)methyl]benzamide (Table 2, 3u)

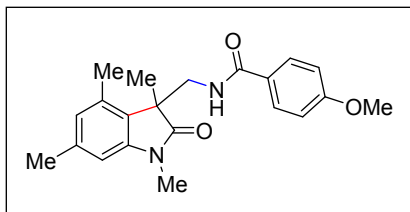

Light yellow solid; m.p. 126-128 °C;  $R_f = 0.36$  (1/1, *n*-Hexane/EtOAc);  $^1\text{H NMR}$  (600 MHz,  $\text{CDCl}_3$ )  $\delta$  7.74 (d,  $J = 8.8$  Hz, 2H), 7.28 (d,  $J = 6.6$  Hz, 1H), 6.90 (d,  $J = 8.7$  Hz, 2H), 6.69 (s, 1H), 6.54 (s, 1H), 4.43 (dd,  $J = 13.5, 8.2$  Hz, 1H), 3.82 (s, 3H), 3.25 (dd,  $J = 13.5, 2.8$  Hz, 1H), 3.20 (s, 3H), 2.43 (s, 3H), 2.33 (s, 3H), 1.50 (s, 3H);  $^{13}\text{C NMR}$  (150 MHz,

$\text{CDCl}_3$ )  $\delta$  180.6, 166.9, 162.1, 143.3, 138.4, 134.7, 128.7, 126.7, 126.3, 126.1, 113.7, 107.0, 55.3, 47.9, 43.4, 30.0, 26.2, 21.5, 18.3; **IR** ( $\text{cm}^{-1}$ ) 3338, 3052, 2928, 2835, 1680, 1604, 1543, 1503, 1453, 1308, 1245, 1176, 1027, 843, 765, 730, 601; **HRMS** (EI)  $m/z$  calculated for  $\text{C}_{22}\text{H}_{19}\text{NO}$   $[\text{M}]^+$ : 352.1787; found: 352.1784.

#### *N*-[(4,6-Difluoro-5-methoxy-1,3-dimethyl-2-oxoindolin-3-yl)methyl]-4-methoxybenzamide (Table 2, 3v)

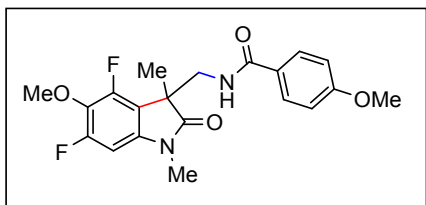

Colorless solid; m.p. 128-129 °C;  $R_f = 0.26$  (1/1, *n*-Hexane/EtOAc);  $^1\text{H NMR}$  (600 MHz,  $\text{CDCl}_3$ )  $\delta$  7.72 (d,  $J = 8.6$  Hz, 2H), 7.00 – 6.94 (m, 1H), 6.90 (d,  $J = 8.7$  Hz, 2H), 6.46 (d,  $J = 9.7$  Hz, 1H), 4.24 (dd,  $J = 13.5, 7.8$  Hz, 1H), 3.93

(s, 3H), 3.83 (s, 3H), 3.46 (dd,  $J = 13.5, 3.5$  Hz, 1H), 3.17 (s, 3H), 1.53 (s, 3H);  $^{19}\text{F NMR}$  (564 MHz,  $\text{CDCl}_3$ )  $\delta$  -126.7 (t,  $J = 9.3$  Hz), -133.1 (d,  $J = 8.9$  Hz);  $^{13}\text{C NMR}$  (150 MHz,  $\text{CDCl}_3$ )  $\delta$  179.3, 166.9, 162.2, 156.5 (dd,  $J = 247.9, 5.6$  Hz), 153.3 (dd,  $J = 251.3, 6.4$  Hz), 138.6 (t,  $J = 12.7$  Hz), 132.5 (t,  $J = 14.7$  Hz), 128.7, 126.5, 113.8, 113.6 (dd,  $J = 18.4, 3.4$  Hz), 94.0 (dd,  $J = 25.6, 3.1$  Hz), 62.5, 55.4, 48.1, 44.1, 26.6, 18.7; **IR** ( $\text{cm}^{-1}$ ) 3324, 3069, 2937, 2839, 1701, 1634, 1606, 1551, 1507, 1428, 1343, 1287, 1247, 1196, 1057, 1018, 982, 848, 819, 769, 608; **HRMS** (EI)  $m/z$  calculated for  $\text{C}_{20}\text{H}_{20}\text{F}_2\text{N}_2\text{O}_4$   $[\text{M}]^+$ : 390.1391; found: 390.1393.

## VI. General Procedure for Aminoarylation of *N*-Aryl-cyclopentene-carboxamides with Benzoyl Azides by Visible Light Photocatalysis

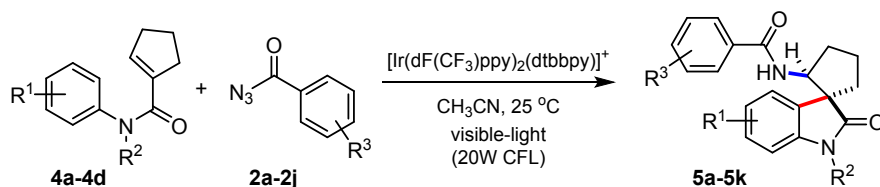

An oven-dried 5 mL borosilicate vial equipped with magnetic stirring bar was charged with substrate (0.20 mmol), benzoyl azide (0.30 mmol, 1.5 equiv),  $[\text{Ir}\{\text{dF}(\text{CF}_3)\text{ppy}\}_2(\text{dtbbpy})]\text{PF}_6$  (5.6 mg, 2.5 mol%), and MeCN (1.5 mL). The resulting solution was degassed by three freeze-pump-thaw cycles and the reaction mixture was irradiated for 36 hours with 20 W CFL light at room temperature from a distance of approximately 3 cm. After completion, the pressure inside the vial was released by a syringe needle and the reaction mixture was diluted with  $\text{CH}_2\text{Cl}_2$  and directly loaded on silica gel. Purification of the crude product was achieved by flash column chromatography using *n*-Hexane/EtOAc as eluent.

### Characterization data of products (Table 3)

#### 4-Methoxy-*N*-[1'-methyl-2'-oxospiro(cyclopentane-1,3'-indolin)-2-yl]benzamide (Table 3, 5a)

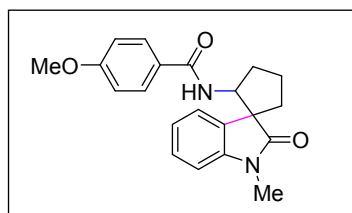

Colorless solid; m.p. 146-147 °C;  $R_f = 0.39$  (1/1, *n*-Hexane/EtOAc);  $^1\text{H NMR}$  (600 MHz,  $\text{CDCl}_3$ )  $\delta$  7.67 (d,  $J = 8.7$  Hz, 2H), 7.31 (d,  $J = 7.4$  Hz, 1H), 7.24 (d,  $J = 7.8$  Hz, 1H), 7.20 (d,  $J = 8.0$  Hz, 1H), 7.09 (t,  $J = 7.5$  Hz, 1H), 6.88 (d,  $J = 8.7$  Hz, 2H), 6.79 (d,  $J = 7.7$  Hz, 1H), 4.79 (dt,  $J = 8.0, 6.7$  Hz, 1H), 3.82 (s, 3H), 3.20 (s, 3H), 2.38 (m, 2H), 2.13 (m, 2H), 2.04 – 1.97 (m, 2H);  $^{13}\text{C NMR}$  (150 MHz,  $\text{CDCl}_3$ )  $\delta$  179.5, 165.9, 162.1, 142.6, 134.5, 128.7, 127.9, 126.6, 123.3, 122.5, 113.6, 108.1, 58.5, 56.7, 55.4, 37.5, 34.3, 26.3, 23.6; **IR** ( $\text{cm}^{-1}$ ) 3299, 2958, 2934, 2834, 1681, 1606, 1556, 1504, 1351, 1304, 1243, 1170, 1088, 1027, 826, 747, 625; **HRMS** (EI)  $m/z$  calculated for  $\text{C}_{21}\text{H}_{22}\text{N}_2\text{O}_3$   $[\text{M}]^+$ : 350.1630; found: 350.1632.



### ***N*-(1'-Methyl-2'-oxospiro[cyclopentane-1,3'-indolin]-2-yl)benzamide (Table 3, 5b)**

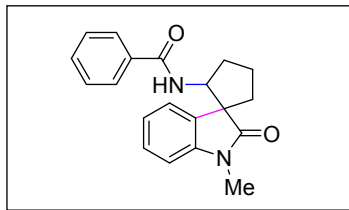

Colorless solid; m.p. 158-160 °C;  $R_f = 0.52$  (1/1, *n*-Hexane/EtOAc);  **$^1\text{H NMR}$**  (600 MHz,  $\text{CDCl}_3$ )  $\delta$  7.70 (d,  $J = 7.7$  Hz, 2H), 7.45 (t,  $J = 7.3$  Hz, 1H), 7.39 (t,  $J = 7.6$  Hz, 2H), 7.32 (d,  $J = 7.4$  Hz, 1H), 7.28 (d,  $J = 7.7$  Hz, 1H), 7.25 (d,  $J = 10.9$  Hz, 1H), 7.10 (t,  $J = 7.6$  Hz, 1H), 6.80 (d,  $J = 7.7$  Hz, 1H), 4.80 (q,  $J = 7.1$  Hz, 1H), 3.21 (s, 3H), 2.45 – 2.34 (m, 2H), 2.18 – 2.11 (m, 2H), 2.05 – 1.98 (m, 2H);  **$^{13}\text{C NMR}$**  (150 MHz,  $\text{CDCl}_3$ )  $\delta$  179.4, 166.3, 142.6, 134.4, 134.3, 131.4, 128.5, 127.9, 126.9, 123.3, 122.5, 108.1, 58.6, 56.7, 37.5, 34.2, 26.3, 23.6; **IR** ( $\text{cm}^{-1}$ ) 3276, 3079, 2931, 2867, 1697, 1637, 1610, 1545, 1471, 1332, 1157, 1084, 1019, 914, 845, 800, 737, 694; **HRMS** (EI)  $m/z$  calculated for  $\text{C}_{20}\text{H}_{20}\text{N}_2\text{O}_2$   $[\text{M}]^+$ : 320.1525; found: 320.1523.

### ***N*-(1'-methyl-2'-oxospiro[cyclopentane-1,3'-indolin]-2-yl)benzamide (Table 3, 5c)**

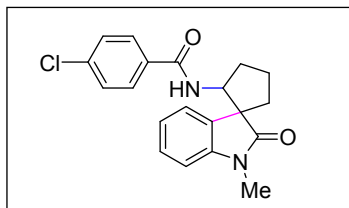

Colorless solid; m.p. 171-172 °C;  $R_f = 0.59$  (1/1, *n*-Hexane/EtOAc);  **$^1\text{H NMR}$**  (600 MHz,  $\text{CDCl}_3$ )  $\delta$  7.65 (d,  $J = 8.4$  Hz, 2H), 7.39 (d,  $J = 7.6$  Hz, 1H), 7.36 (d,  $J = 8.4$  Hz, 2H), 7.30 (d,  $J = 7.4$  Hz, 1H), 7.26 (d,  $J = 15.4$  Hz, 1H), 7.10 (t,  $J = 7.5$  Hz, 1H), 6.80 (d,  $J = 7.7$  Hz, 1H), 4.73 (q,  $J = 6.8$  Hz, 1H), 3.20 (s, 3H), 2.48 - 2.32 (m, 2H), 2.18 – 2.10 (m, 2H), 2.05 – 1.96 (m, 2H);  **$^{13}\text{C NMR}$**  (150 MHz,  $\text{CDCl}_3$ )  $\delta$  179.4, 165.2, 142.5, 137.6, 134.4, 132.6, 128.7, 128.3, 128.0, 123.4, 122.5, 108.2, 58.6, 56.6, 37.6, 34.3, 26.3, 23.6; **IR** ( $\text{cm}^{-1}$ ) 3317, 3046, 2922, 2868, 2853, 1679, 1651, 1613, 1530, 1471, 1379, 1352, 1305, 1272, 1152, 1116, 1086, 1009, 848, 747, 700, 649; **HRMS** (EI)  $m/z$  calculated for  $\text{C}_{20}\text{H}_{19}\text{ClN}_2\text{O}_2$   $[\text{M}]^+$ : 354.1135; found: 354.1133.

#### 4-Bromo-*N*-[1'-methyl-2'-oxospiro(cyclopentane-1,3'-indolin)-2-yl]benzamide (Table 3, 5d)

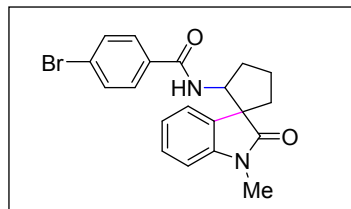

Colorless solid; m.p. 194-195 °C;  $R_f = 0.59$  (1/1, *n*-Hexane/EtOAc);  $^1\text{H NMR}$  (600 MHz,  $\text{CDCl}_3$ )  $\delta$  7.58 (d,  $J = 8.5$  Hz, 2H), 7.52 (d,  $J = 8.5$  Hz, 2H), 7.40 (d,  $J = 7.7$  Hz, 1H), 7.30 (d,  $J = 7.4$  Hz, 1H), 7.25 (t, 1H), 7.10 (t,  $J = 7.5$  Hz, 1H), 6.81 (d,  $J = 7.7$  Hz, 1H), 4.73 (q,  $J = 6.8$  Hz, 1H), 3.20 (s, 3H), 2.47 – 2.39 (m, 1H), 2.37 (m, 1H), 2.18 – 2.11 (m, 2H), 2.05 – 1.98 (m, 2H);  $^{13}\text{C NMR}$  (150 MHz,  $\text{CDCl}_3$ )  $\delta$  179.4, 165.3, 142.5, 134.4, 133.1, 131.7, 128.5, 128.0, 126.1, 123.4, 122.5, 108.2, 58.6, 56.6, 37.6, 34.3, 26.3, 23.6; **IR** ( $\text{cm}^{-1}$ ) 3320, 3052, 2960, 2945, 2868, 1678, 1650, 1612, 1530, 1471, 1421, 1379, 1352, 1270, 1150, 1115, 1089, 1068, 1006, 846, 746, 697; **HRMS** (EI)  $m/z$  calculated for  $\text{C}_{20}\text{H}_{19}\text{BrN}_2\text{O}_2$   $[\text{M}]^+$ : 398.0630; found: 398.0633.

#### *N*-(1'-Methyl-2'-oxospiro[cyclopentane-1,3'-indolin]-2-yl)-4-(trifluoromethyl)-benzamide (Table 3, 5e)

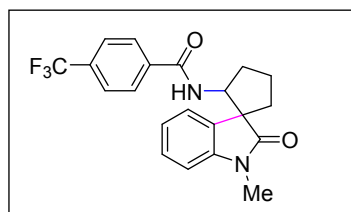

Colorless solid; m.p. 167-168 °C;  $R_f = 0.65$  (1/1, *n*-Hexane/EtOAc);  $^1\text{H NMR}$  (600 MHz,  $\text{CDCl}_3$ )  $\delta$  7.83 (d,  $J = 8.1$  Hz, 2H), 7.66 (d,  $J = 8.1$  Hz, 2H), 7.57 (d,  $J = 7.2$  Hz, 1H), 7.30 (d,  $J = 7.4$  Hz, 1H), 7.26 (d,  $J = 6.6$  Hz, 1H), 7.10 (t,  $J = 7.6$  Hz, 1H), 6.81 (s, 1H), 4.73 (m, 1H), 3.22 (s, 3H), 2.45 (dq,  $J = 11.6, 5.9, 3.5$  Hz, 1H), 2.40 – 2.33 (m, 1H), 2.20 – 2.15 (m, 2H), 2.07 – 1.99 (m, 2H);  $^{19}\text{F NMR}$  (564 MHz,  $\text{CDCl}_3$ )  $\delta$  -62.9;  $^{13}\text{C NMR}$  (150 MHz,  $\text{CDCl}_3$ )  $\delta$  179.3, 165.0, 142.5, 137.5, 134.4, 133.1 (q,  $J = 32.4$  Hz), 128.1, 127.4, 125.5 (q,  $J = 3.7$  Hz), 123.6 (q,  $J = 273.3$ ), 123.4, 122.5, 108.2, 58.7, 56.5, 37.6, 34.3, 26.3, 23.6; **IR** ( $\text{cm}^{-1}$ ) 3246, 3047, 2950, 2866, 1700, 1638, 1545, 1472, 1320, 1115, 1063, 1015, 865, 773, 737, 669; **HRMS** (EI)  $m/z$  calculated for  $\text{C}_{21}\text{H}_{19}\text{F}_3\text{N}_2\text{O}_2$   $[\text{M}]^+$ : 388.1399; found: 388.1399.

#### 4-Cyano-*N*-[1'-methyl-2'-oxospiro(cyclopentane-1,3'-indolin)-2-yl]benzamide (Table 3, 5f)

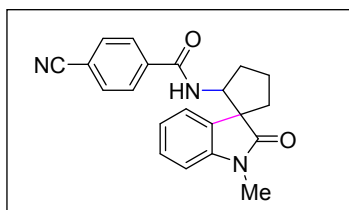

Colorless solid; m.p. 166-167 °C;  $R_f = 0.44$  (1/1, *n*-Hexane/EtOAc);  $^1\text{H NMR}$  (600 MHz,  $\text{CDCl}_3$ )  $\delta$  7.82 (d,  $J = 8.2$  Hz, 2H), 7.69 (d,  $J = 8.1$  Hz, 2H), 7.64 (d,  $J = 7.3$  Hz, 1H), 7.33 – 7.24 (m, 2H), 7.11 (t,  $J = 7.5$  Hz, 1H), 6.83 (d,  $J = 7.7$  Hz, 1H), 4.69 (q,  $J = 6.7$  Hz, 1H), 3.21 (s, 3H), 2.45 (q,  $J = 8.2$  Hz, 1H), 2.37 (q,  $J = 12.3, 8.4$  Hz, 1H), 2.19 – 2.12 (m, 2H), 2.06 – 1.97 (m, 2H);  $^{13}\text{C NMR}$  (150 MHz,  $\text{CDCl}_3$ )  $\delta$  179.3, 164.5, 142.4, 138.2, 134.3, 132.4, 128.1, 127.6, 123.5, 122.5, 118.1, 114.9, 108.3, 58.7, 56.4, 37.7, 34.4, 26.4, 23.6; **IR** ( $\text{cm}^{-1}$ ) 3310, 3053, 2953, 2869, 2228, 1654, 1610, 1527, 1492, 1468, 1376, 1348, 1269, 1088, 1018, 913, 854, 745; **HRMS** (EI)  $m/z$  calculated for  $\text{C}_{21}\text{H}_{19}\text{N}_3\text{O}_2$   $[\text{M}]^+$ : 345.1477; found: 345.1475.

#### 3,5-Dimethyl-*N*-[1'-methyl-2'-oxospiro(cyclopentane-1,3'-indolin)-2-yl]benzamide (Table 3, 5g)

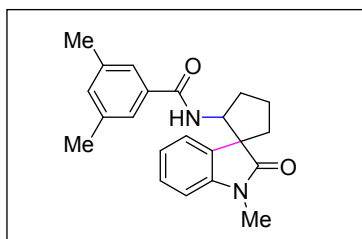

Colorless solid; m.p. 148-149 °C;  $R_f = 0.61$  (1/1, *n*-Hexane/EtOAc);  $^1\text{H NMR}$  (600 MHz,  $\text{CDCl}_3$ )  $\delta$  7.32 (d,  $J = 7.4$  Hz, 1H), 7.27 (s, 2H), 7.24 (d,  $J = 7.7$  Hz, 1H), 7.09 (q,  $J = 7.9$  Hz, 3H), 6.79 (d,  $J = 7.7$  Hz, 1H), 4.83 (q,  $J = 7.3$  Hz, 1H), 3.21 (s, 3H), 2.41 – 2.35 (m, 2H), 2.32 (s, 6H), 2.18 – 2.12 (m, 2H), 2.05 – 1.99 (m, 2H);  $^{13}\text{C NMR}$  (150 MHz,  $\text{CDCl}_3$ )  $\delta$  179.4, 166.8, 142.7, 138.1, 134.3, 134.2, 132.9, 127.9, 124.6, 123.3, 122.5, 108.0, 58.6, 56.8, 37.3, 33.9, 26.2, 23.4, 21.2; **IR** ( $\text{cm}^{-1}$ ) 3249, 3051, 2949, 2916, 2868, 1707, 1634, 1609, 1540, 1471, 1334, 1259, 1089, 908, 858, 770, 733, 692, 544, 495, 472; **HRMS** (EI)  $m/z$  calculated for  $\text{C}_{22}\text{H}_{24}\text{N}_2\text{O}_2$   $[\text{M}]^+$ : 348.1838; found: 348.1840.

**3,5-Dichloro-*N*-[1'-methyl-2'-oxospiro(cyclopentane-1,3'-indolin)-2-yl]benzamide (Table 3, 5h)**

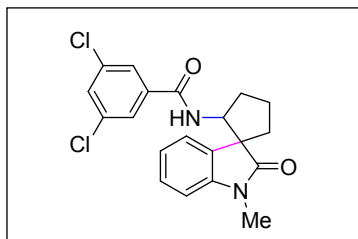

Colorless solid; m.p. 198-199 °C;  $R_f = 0.77$  (1/1, *n*-Hexane/EtOAc);  $^1\text{H NMR}$  (600 MHz,  $\text{CDCl}_3$ )  $\delta$  7.55 (d,  $J = 1.8$  Hz, 2H), 7.43 (t,  $J = 1.6$  Hz, 1H), 7.36 (d,  $J = 7.8$  Hz, 1H), 7.30 (d,  $J = 7.4$  Hz, 1H), 7.27 (t,  $J = 6.7$  Hz, 1H), 7.10 (t,  $J = 7.6$  Hz, 1H), 6.82 (d,  $J = 7.7$  Hz, 1H), 4.72 (q,  $J = 6.9$  Hz, 1H), 3.22 (s, 3H), 2.44 – 2.39 (m, 1H), 2.39 – 2.34 (m, 1H), 2.18 – 2.13 (m, 2H), 2.02 (m, 2H);  $^{13}\text{C NMR}$  (150 MHz,  $\text{CDCl}_3$ )  $\delta$  179.2, 163.9, 142.6, 137.2, 135.3, 134.1, 131.2, 128.1, 125.6, 123.4, 122.5, 108.2, 58.8, 56.6, 37.4, 34.1, 26.3, 23.5; **IR** ( $\text{cm}^{-1}$ ) 3329, 3070, 2969, 2932, 2868, 1678, 1651, 1611, 1561, 1535, 1496, 1461, 1379, 1352, 1306, 1274, 1117, 1089, 904, 875, 794, 748, 699, 670; **HRMS** (EI)  $m/z$  calculated for  $\text{C}_{20}\text{H}_{18}\text{Cl}_2\text{N}_2\text{O}_2$   $[\text{M}]^+$ : 388.0745; found: 388.0748.

***N*-(1'-Benzyl-2'-oxospiro[cyclopentane-1,3'-indolin]-2-yl)-4-bromobenzamide (Table 3, 5i)**

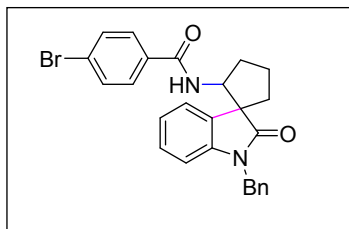

Colorless solid; m.p. 162-163 °C;  $R_f = 0.70$  (1/1, *n*-Hexane/EtOAc);  $^1\text{H NMR}$  (600 MHz,  $\text{CDCl}_3$ )  $\delta$  7.49 (q, 4H), 7.34 (d,  $J = 7.4$  Hz, 1H), 7.15 (q,  $J = 9.0$  Hz, 4H), 7.09 (dt,  $J = 15.8, 7.3$  Hz, 4H), 6.69 (d, 1H), 5.02 (d,  $J = 15.8$  Hz, 1H), 4.92 (q,  $J = 7.8$  Hz, 1H), 4.78 (d,  $J = 15.8$  Hz, 1H), 2.47 – 2.39 (m, 2H), 2.22 – 2.11 (m, 2H), 2.10 – 2.00 (m, 2H);  $^{13}\text{C NMR}$  (150 MHz,  $\text{CDCl}_3$ )  $\delta$  179.6, 165.3, 141.9, 135.4, 134.3, 132.8, 131.7, 128.7, 128.5, 127.9, 127.6, 126.9, 126.1, 123.5, 122.6, 109.0, 58.6, 56.8, 43.7, 38.0, 34.3, 23.7; **IR** ( $\text{cm}^{-1}$ ) 3362, 3053, 3035, 2923, 2853, 1684, 1662, 1609, 1529, 1483, 1462, 1349, 1149, 1070, 1010, 843, 749, 733, 697; **HRMS** (EI)  $m/z$  calculated for  $\text{C}_{26}\text{H}_{23}\text{BrN}_2\text{O}_2$   $[\text{M}]^+$ : 474.0943; found: 474.0946.

**4-Bromo-*N*-[1',7'-dimethyl-2'-oxospiro(cyclopentane-1,3'-indolin)-2-yl]benzamide (Table 3, 5j)**

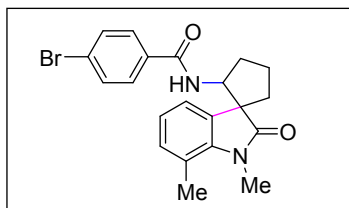

Colorless solid; m.p. 130-132 °C;  $R_f = 0.69$  (1/1, *n*-Hexane/EtOAc);  $^1\text{H NMR}$  (600 MHz,  $\text{CDCl}_3$ )  $\delta$  7.58 (d,  $J = 7.9$  Hz, 2H), 7.52 (d,  $J =$

7.9 Hz, 2H), 7.34 (d,  $J = 7.3$  Hz, 1H), 7.14 (t,  $J = 4.3$  Hz, 1H), 6.97 (d,  $J = 4.4$  Hz, 2H), 4.73 (q,  $J = 7.2$  Hz, 1H), 3.48 (s, 3H), 2.53 (s, 3H), 2.43 – 2.31 (m, 2H), 2.15 – 2.06 (m, 2H), 2.02 – 1.94 (m, 2H);  $^{13}\text{C}$  NMR (150 MHz,  $\text{CDCl}_3$ )  $\delta$  180.1, 165.2, 140.3, 135.2, 133.1, 131.7, 131.7, 128.5, 126.0, 123.3, 120.4, 119.7, 58.8, 56.0, 38.3, 34.5, 29.6, 23.8, 18.9; IR ( $\text{cm}^{-1}$ ) 3292, 3049, 2954, 2927, 2870, 1703, 1632, 1591, 1542, 1455, 1332, 1145, 1095, 1068, 1010, 845, 743, 644; HRMS (EI)  $m/z$  calculated for  $\text{C}_{21}\text{H}_{21}\text{BrN}_2\text{O}_2$   $[\text{M}]^+$ : 412.0786; found: 412.0789.

***N*-[1'-Methyl-2'-oxo-5'-(trifluoromethyl)spiro(cyclopentane-1,3'-indolin)-2-yl]benzamide**  
(Table 3, 5k)

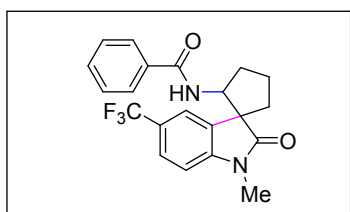

Colorless solid; m.p. 231-232 °C;  $R_f = 0.57$  (1/1, *n*-Hexane/EtOAc);

$^1\text{H}$  NMR (600 MHz,  $\text{CDCl}_3$ )  $\delta$  7.73 (s, 1H), 7.62 (d,  $J = 7.7$  Hz, 1H), 7.49 (d,  $J = 7.7$  Hz, 1H), 7.39 (t,  $J = 7.7$  Hz, 1H), 7.32 (d,  $J = 7.2$  Hz, 2H), 7.25 (t, 1H), 7.10 (t,  $J = 7.5$  Hz, 1H), 6.81 (d,  $J = 7.7$  Hz, 1H), 4.79 (q,  $J = 6.9$  Hz, 1H), 4.59 (s, 2H), 3.21 (s, 3H), 2.45-2.35 (m, 2H), 2.19-2.13 (m, 2H), 2.05-2.00 (m, 2H);  $^{19}\text{F}$  NMR (564 MHz,  $\text{CDCl}_3$ )  $\delta$  -61.4;  $^{13}\text{C}$  NMR (150 MHz,  $\text{CDCl}_3$ )  $\delta$  179.3, 166.5, 145.7, 135.3, 134.1, 131.5, 128.5, 126.8, 125.8 (q,  $J = 3.9$  Hz), 125.5 (q,  $J = 31.7$ ), 123.4, 119.4 (q,  $J = 3.7$  Hz), 107.9, 58.7, 56.8, 37.7, 34.4, 26.4, 23.9; IR ( $\text{cm}^{-1}$ ) 3376, 3063, 2948, 2920, 2851, 1701, 1650, 1619, 1536, 1491, 1324, 1284, 1164, 1139, 1113, 895, 834, 707, 689; HRMS (EI)  $m/z$  calculated for  $\text{C}_{21}\text{H}_{19}\text{F}_3\text{N}_2\text{O}_2$   $[\text{M}]^+$ : 388.1399; found: 388.1400.

## VII. Procedures for Mechanistic Studies

### VII-1. Effect of hydrogen atom sources on benzoyl azide and *N*-arylmethacrylamide under the standard reaction conditions (Scheme 2b (Extended))

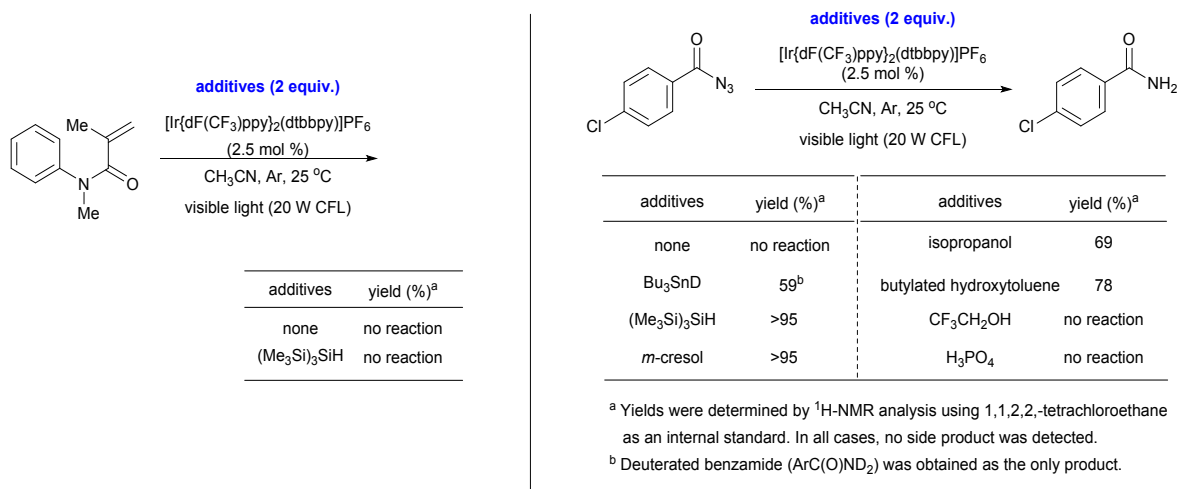

#### Proc

**Procedure A (benzoyl azide)** : To an oven-dried borosilicate vial (3 mL) equipped with magnetic stirring bar were added 4-chlorobenzoyl azide (0.20 mmol), additive (0.40 mmol, 2.0 equiv.),  $[\text{Ir}\{\text{dF}(\text{CF}_3)\text{ppy}\}_2(\text{dtbbpy})\text{PF}_6$  (5.6 mg, 2.5 mol%) and dry  $\text{MeCN-}d_3$  (1.5 mL). The resulting mixture was degassed by three freeze-pump-thaw cycles via a syringe needle and filled with argon. The vial was irradiated using 20 W CFL household light bulb at room temperature. After 36 h of irradiation at room temperature, the reaction mixture was analyzed via <sup>1</sup>H NMR using 1,1,2,2-tetrachloroethane as an internal standard to show the results summarized in the above table. For every cases, conversions were same as the yields, thus no side products were detected other than the unreacted starting material (4-chlorobenzoyl azide).

**Procedure B (*N*-arylmethacrylamide)** : To an oven-dried borosilicate vial (3 mL) equipped with magnetic stirring bar were added *N*-arylmethacrylamide (0.20 mmol), additive (0.40 mmol, 2.0 equiv.),  $[\text{Ir}\{\text{dF}(\text{CF}_3)\text{ppy}\}_2(\text{dtbbpy})\text{PF}_6$  (5.6 mg, 2.5 mol%) and dry  $\text{MeCN-}d_3$  (1.5 mL). The rest of the experimental details are same as above (Procedure A).

## VII-2. H/D scrambling experiment (Scheme 2c)

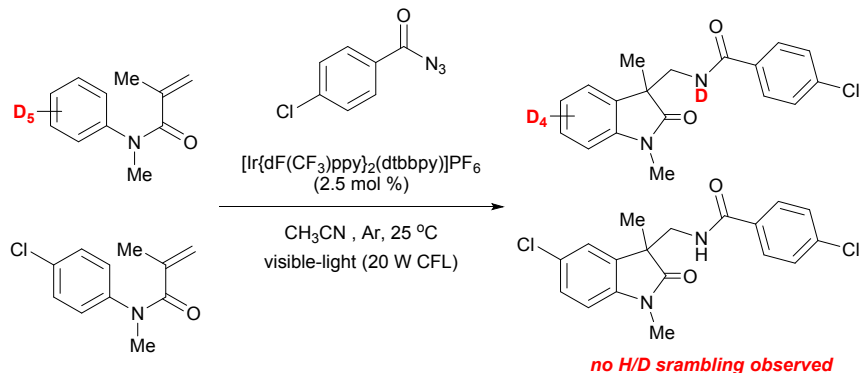

**Procedure:** To an oven-dried borosilicate vial (3 mL) equipped with magnetic stirring bar were added 4-chlorobenzoyl azide (0.3 mmol),  $N$ -(phenyl- $D_5$ )methacrylamide (0.1 mmol),  $N$ -(4-chlorophenyl)methacrylamide (0.1 mmol),  $[Ir\{dF(CF_3)ppy\}_2(dtbbpy)]PF_6$  (5.6 mg, 2.5 mol%) and dry  $MeCN-d_3$  (1.5 mL). The resulting mixture was degassed by three freeze-pump-thaw cycles via a syringe needle and filled with argon. The vial was irradiated using 20 W CFL household light bulb at room temperature. After 36 h of irradiation at room temperature, the reaction mixture was analyzed via  $^1H$  NMR using 1,1,2,2-tetrachloroethane as an internal standard to show that no H/D scrambling occurred.

### VII-3. Repeated on-off cycling of irradiation experiment

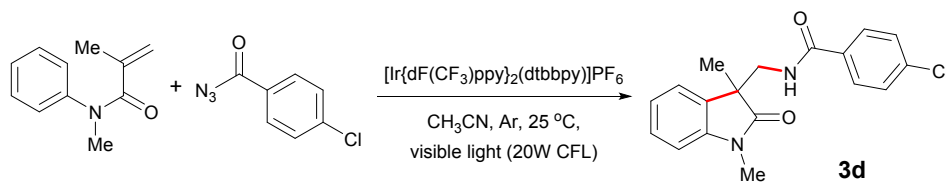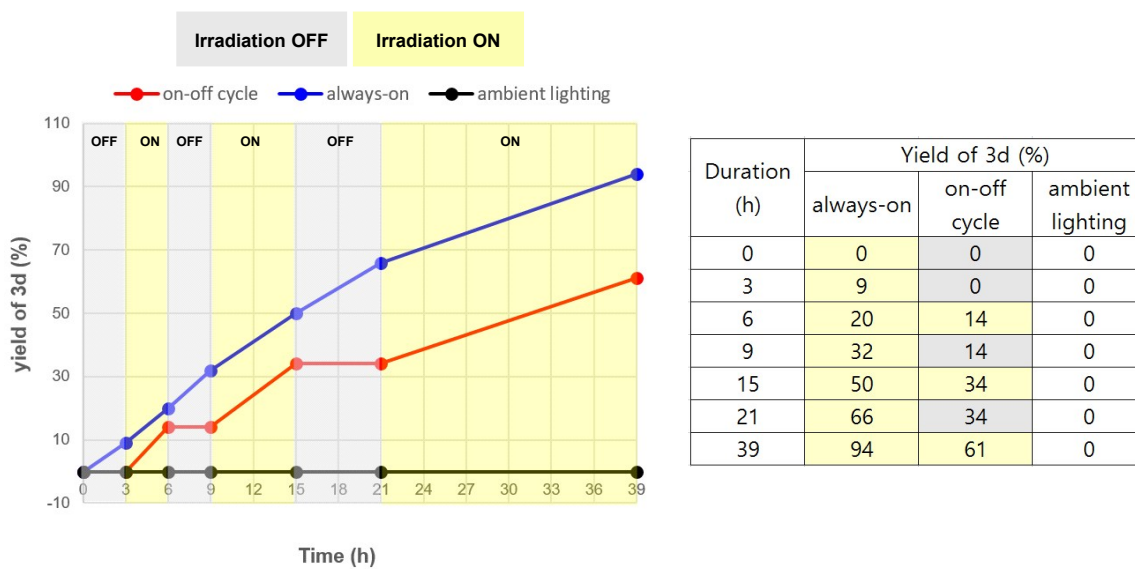

**Procedure:** To each of three oven-dried J. Young valve NMR tubes, the solution of 4-chlorobenzoyl azide (0.15 mmol), *N*-phenylmethacrylamide (0.1 mmol),  $[\text{Ir}\{\text{dF}(\text{CF}_3)\text{ppy}\}_2(\text{dtbbpy})]\text{PF}_6$  (0.0025 mmol (2.5 mol%)) and 1,3,5-trimethoxybenzene (0.1 mmol, NMR internal standard) in dry  $\text{MeCN-d}_3$  (0.75 mL) was added. The three J Young NMR tubes were degassed by three freeze-pump-thaw cycles and filled with argon. The first sample was irradiated continuously during the course of the experiment (20 W CFL household light bulb at room temperature). The second sample was applied under the on-off cycling of irradiation using aluminum foil wrapping for the ‘off’ session (20 W CFL household light bulb at room temperature). The last sample was let stand under the ambient laboratory lighting at room temperature through the reaction period. The three samples were analyzed via  $^1\text{H-NMR}$  using 1,3,5-trimethoxybenzene as an internal standard and the result is summarized as shown above.



## VII-4. Evaluation of König's and Yoon's reaction conditions<sup>[S4], [S9]</sup>

### (a) Evaluation of König's reaction conditions to promote photocatalytic cascade cyclization

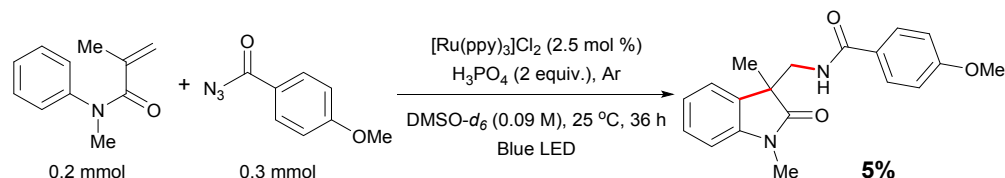

Conditions developed by König and coworkers for C-H amination of electron-rich heteroarenes<sup>[S4]</sup> were evaluated for our photocatalytic cascade cyclization reaction.

**Procedure:** To an oven-dried borosilicate vial (3 mL) equipped with magnetic stirring bar were added 4-methoxybenzoyl azide (0.3 mmol), *N*-phenylmethacrylamide (0.2 mmol), orthophosphoric acid (0.4 mmol), [Ru(bpy)<sub>3</sub>]Cl<sub>2</sub> (0.005 mmol, 2.5 mol%) and dry DMSO-*d*<sub>6</sub> (0.09 M). The resulting mixture was degassed by three freeze-pump-thaw cycles via a syringe needle and filled with argon. The vial was irradiated using blue LED strip at room temperature. After 36 h of irradiation at room temperature, the reaction mixture was analyzed via <sup>1</sup>H NMR using 1,1,2,2-tetrachloroethane as an internal standard. 5% of oxindole product was obtained and no side products were detected.

### (b) Evaluation of Yoon's reaction conditions to promote photocatalytic cascade cyclization

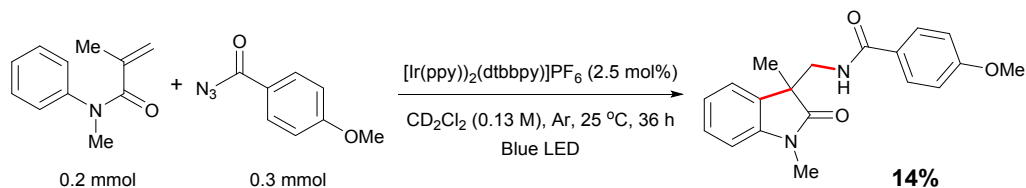

Conditions developed by Yoon and coworkers for olefin aziridination<sup>[S9]</sup> were evaluated for our photocatalytic cascade cyclization reaction.

**Procedure:** To an oven-dried borosilicate vial (3 mL) equipped with magnetic stirring bar were added 4-methoxybenzoyl azide (0.3 mmol), *N*-phenylmethacrylamide (0.2 mmol), [Ir(ppy)<sub>2</sub>(dtbbpy)]PF<sub>6</sub> (0.005 mmol, 2.5 mol%) and dry CD<sub>2</sub>Cl<sub>2</sub> (0.13 M). The resulting mixture was degassed by three freeze-pump-thaw cycles via a syringe needle and filled with argon. The vial was irradiated using blue LED strip at room temperature. After 36 h of irradiation at room temperature, the reaction mixture was analyzed via <sup>1</sup>H NMR using 1,1,2,2-tetrachloroethane as an internal standard. 14% of oxindole product was obtained and no side products were detected.

## VIII. Emission Spectrum of 20 W Compact Fluorescent Lamp (CFL) Utilized in the Photocatalysis

- Emission spectrum was measured on HORIBA (model QM-400) spectrophotometer.

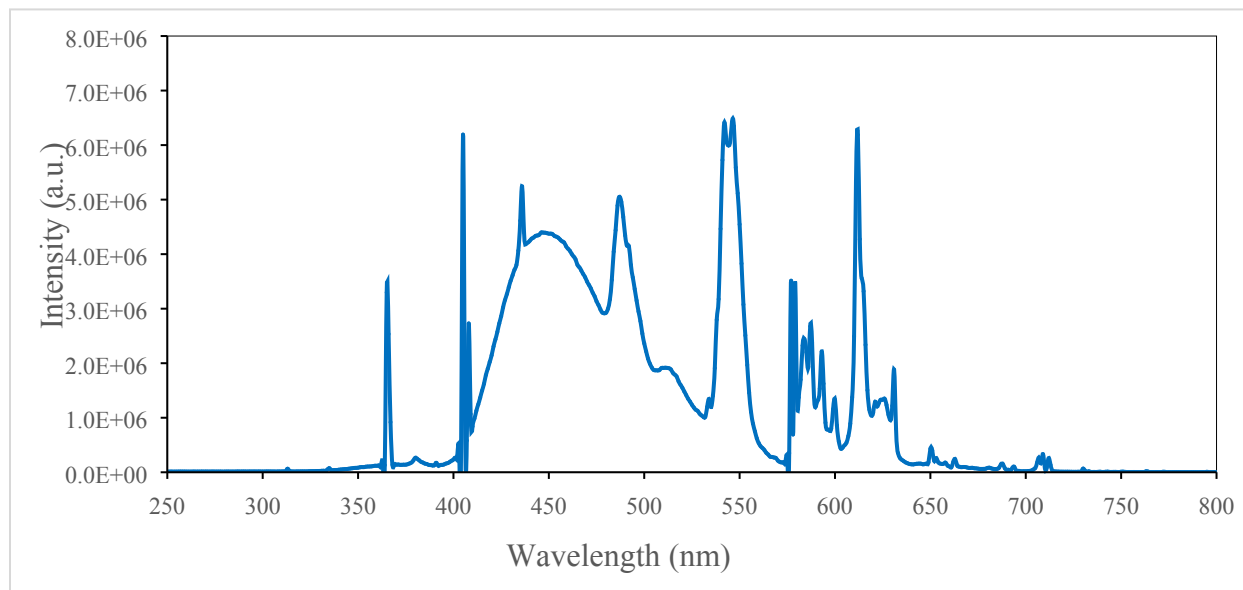

**Figure S-2.** Emission spectrum of 20 W CFL utilized in the present photoinduced cascade cyclization of *N*-arylacrylamides with benzoyl azides.

## IX. Absorption and Emission Spectra of the Visible-Light Photocatalyst $[\text{Ir}\{\text{dF}(\text{CF}_3)\text{ppy}\}_2(\text{dtbbpy})]\text{PF}_6$

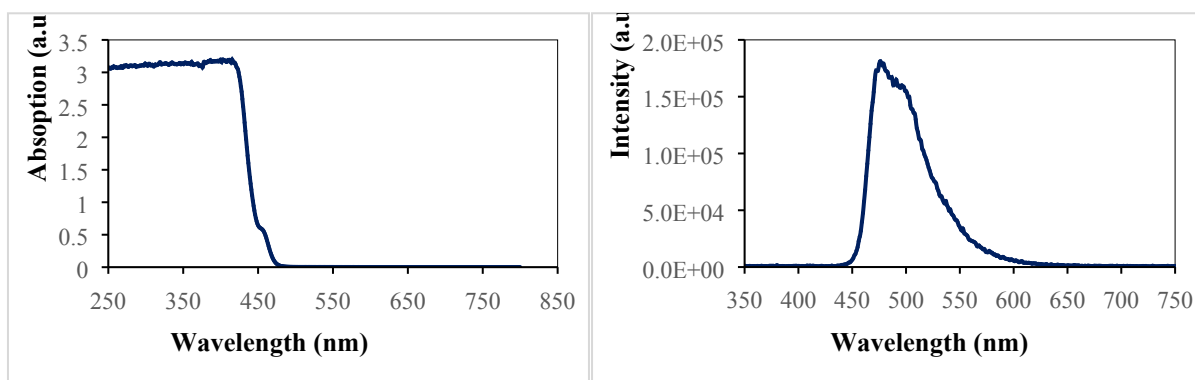

**Figure S-1.** (left) Absorbance of a  $2.5 \times 10^{-5}$  M solution of  $[\text{Ir}\{\text{dF}(\text{CF}_3)\text{ppy}\}_2(\text{dtbbpy})]\text{PF}_6$  catalyst in MeCN; (right) Emission spectra of  $[\text{Ir}\{\text{dF}(\text{CF}_3)\text{ppy}\}_2(\text{dtbbpy})]\text{PF}_6$  catalyst in MeCN.

## X. Emission Quenching Experiment (Stern-Volmer Quenching)

All solutions were prepared volumetrically inside a nitrogen filled glove box. In a typical experiment,  $[\text{Ir}\{\text{dF}(\text{CF}_3)\text{ppy}\}_2(\text{dtbbpy})]\text{PF}_6$  catalyst and an appropriate amount of quencher dissolved in MeCN were added to 10 mm quartz cuvette. The quartz cuvette was then sealed with PTFE stopper or rubber septum, placed outside the glovebox, and then spectrum was collected. Fluorescence emission spectra were collected on Shimadzu (RF-5301pc) Spectrofluorophotometer with excitation and emission slit width of 5.0 nm. Samples containing  $[\text{Ir}\{\text{dF}(\text{CF}_3)\text{ppy}\}_2(\text{dtbbpy})]\text{PF}_6$  photocatalyst and quenchers were excited at 403 nm and the emission was monitored at 479 nm. All measurements were carried out under the same conditions as in the cyclization reactions.

### Stern-Volmer quenching experiment for $[\text{Ir}\{\text{dF}(\text{CF}_3)\text{ppy}\}_2(\text{dtbbpy})]\text{PF}_6$ with benzoyl azide

A solution of  $[\text{Ir}\{\text{dF}(\text{CF}_3)\text{ppy}\}_2(\text{dtbbpy})](\text{PF}_6)$  in MeCN was excited at 403 nm and the intensity of emission spectrum was measured at 479 nm (emission maximum) (10 mm quartz cuvette). For each quenching experiment, the emission intensity of the solution of  $[\text{Ir}\{\text{dF}(\text{CF}_3)\text{ppy}\}_2(\text{dtbbpy})](\text{PF}_6)$  (0.025 mM) with different concentration of quencher (benzoyl azide: 0.0, 0.5 1.0, 1.5, and 2.0 mM) was collected. ( $I_0$  : without quencher,  $I$  : with quencher)

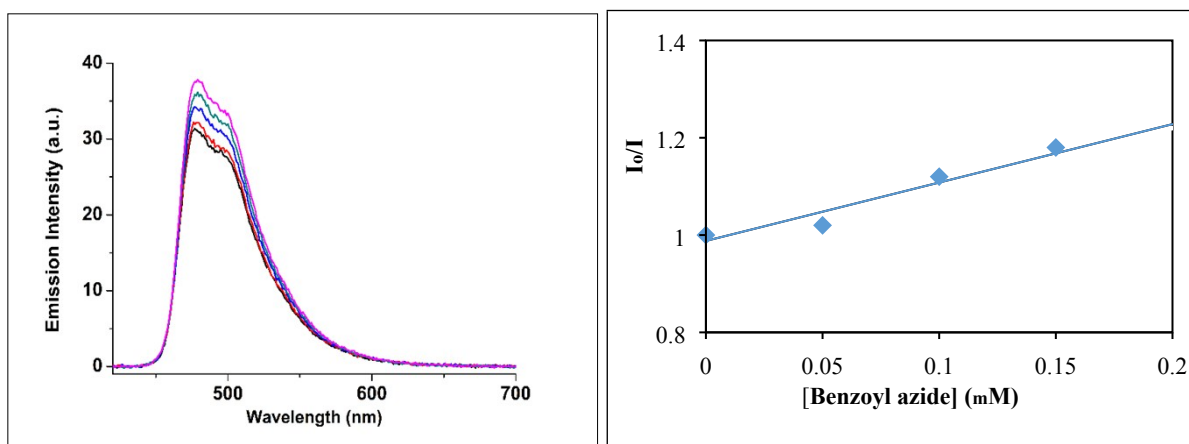

**Figure S-2.** (left) Changes in the fluorescence spectrum of  $[\text{Ir}\{\text{dF}(\text{CF}_3)\text{ppy}\}_2(\text{dtbbpy})](\text{PF}_6)$  upon successive addition of benzoyl azide and (right) Stern-Volmer plot

# XI. DFT Computational Studies and Coordinates of Optimized Structures and Transition States

## XI-1. Computational details

DFT calculations were carried out by using UB3LYP method.<sup>S10</sup> To optimize geometry structures and vibrational frequencies, Los Alamos National Laboratory 2  $\zeta$  (LANL2DZ) ECP basis set<sup>S11</sup> was used for iridium atom, while using the 6-31G\*\* basis set for other main group atoms. Electronic energies of optimized structures were further corrected by single point calculations of UB3LYP method<sup>S10</sup> with Los Alamos National Laboratory 2  $\zeta$  (LANL2DZ) ECP basis set<sup>S11-12</sup> for iridium atom and 6-311++G\*\*<sub>ref</sub> basis set for other main group atoms. Thermodynamic parameters including Gibbs free energies at 298 K were obtained by frequency calculations. Transition states are realized by the presence of single negative frequency. Solvent effects were accounted at the PCM method<sup>S13</sup> in acetonitrile ( $\epsilon = 37.5$ ) as the experiments were carried out in the same solvent. All calculations performed by Gaussian09 program.<sup>S14-15</sup> Graphical structures were visualized with CYLview.<sup>S16</sup>

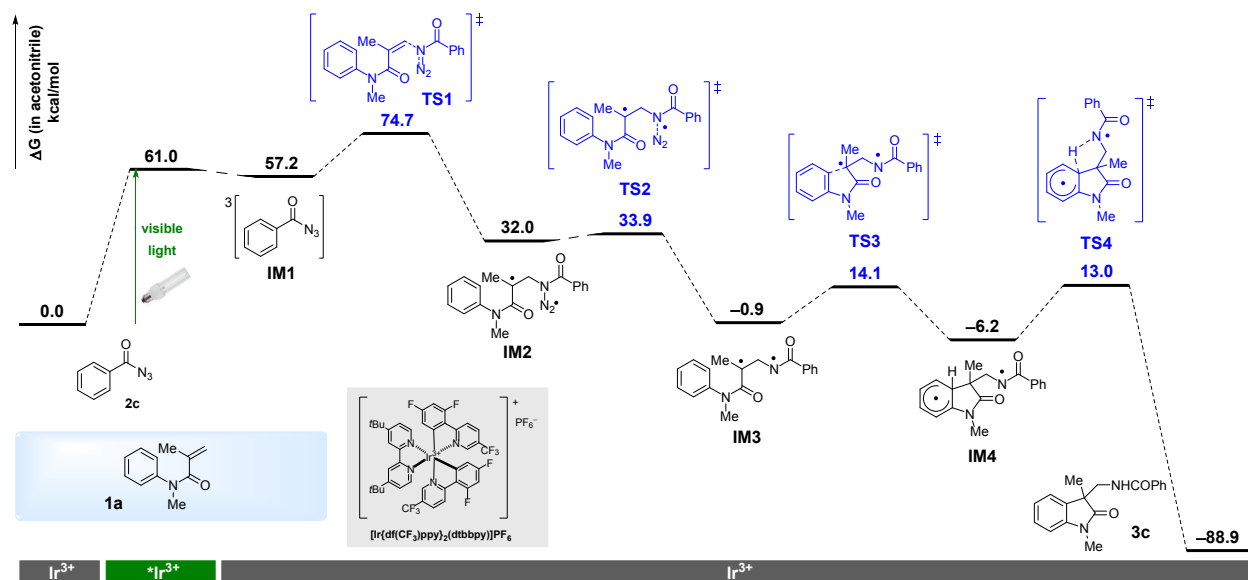

Figure S-3. DFT-calculated reaction energy profile of the photocatalytic cascade cyclization.

## XI-2. Cartesian coordinates of optimized structures and geometries of stationary and transition states in 'Figure S-3'

Ir<sup>3+</sup>

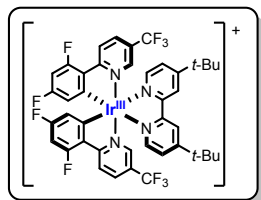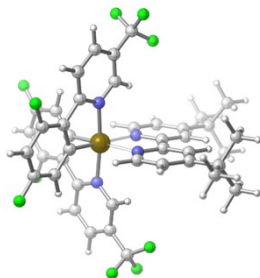

|    |             |             |             |   |             |             |             |
|----|-------------|-------------|-------------|---|-------------|-------------|-------------|
| C  | 2.14938300  | -0.10076700 | 0.73531000  | C | -2.56242700 | 1.11431900  | 2.05048400  |
| C  | 3.31546600  | -0.17339700 | 1.49587400  | C | -2.25634900 | -0.12510700 | 1.41098500  |
| C  | 3.27115200  | -0.36693700 | 2.88488600  | C | -2.93592100 | -1.27910600 | 1.82094500  |
| C  | 1.99778400  | -0.48286500 | 3.45406700  | C | -3.88272400 | -1.19866200 | 2.83555000  |
| C  | 0.86688400  | -0.40151200 | 2.64990000  | C | -4.20466500 | -0.00899600 | 3.48137100  |
| N  | 0.92753700  | -0.21610800 | 1.32203800  | C | -3.53083600 | 1.12755100  | 3.06845600  |
| H  | 4.27386300  | -0.07440500 | 1.00420400  | H | -2.74661500 | -2.24547200 | 1.36861400  |
| H  | 1.86118600  | -0.63463600 | 4.51655500  | H | -4.94594700 | 0.03340200  | 4.26909200  |
| H  | -0.12656600 | -0.48942900 | 3.07368300  | C | -1.81763400 | 2.27709100  | 1.57870100  |
| C  | 2.14933300  | 0.10210400  | -0.73516700 | C | -1.93906200 | 3.59960200  | 2.03993600  |
| C  | 3.31539100  | 0.17540100  | -1.49570300 | C | -1.16242000 | 4.60473400  | 1.48787900  |
| C  | 0.86671500  | 0.40222600  | -2.64977200 | H | -2.64079900 | 3.82509300  | 2.82786600  |
| C  | 3.27100900  | 0.36900200  | -2.88470300 | C | -0.16878900 | 2.96915300  | 0.04676200  |
| H  | 4.27382700  | 0.07689100  | -1.00401700 | C | -0.25819300 | 4.28675100  | 0.46941700  |
| C  | 1.99758900  | 0.48425000  | -3.45390600 | H | -1.25296200 | 5.62410900  | 1.84704500  |
| H  | -0.12677300 | 0.48959200  | -3.07357900 | H | 0.51681500  | 2.67655800  | -0.73608500 |
| H  | 1.86093000  | 0.63598200  | -4.51639300 | N | -0.92084000 | 1.99174200  | 0.58125400  |
| N  | 0.92742900  | 0.21678000  | -1.32191400 | C | 0.57204700  | 5.35466900  | -0.18448000 |
| C  | 4.56947300  | -0.44230800 | 3.69872700  | F | 1.61091200  | 4.83614500  | -0.87295700 |
| C  | 5.41596900  | -1.63313900 | 3.18623000  | F | 1.07159700  | 6.21554100  | 0.72815300  |
| C  | 5.36047900  | 0.87542800  | 3.51198400  | F | -0.15791600 | 6.08824200  | -1.05522900 |
| C  | 4.29667700  | -0.64255900 | 5.20097800  | F | -3.84460600 | 2.28382100  | 3.69860600  |
| H  | 4.87908300  | -2.57927200 | 3.30805200  | F | -4.52499400 | -2.32062800 | 3.21759200  |
| H  | 5.67923500  | -1.52563800 | 2.12992500  | C | -2.56152100 | -1.11587800 | -2.05056600 |
| H  | 6.34801700  | -1.69474700 | 3.75703500  | C | -2.25637000 | 0.12373000  | -1.41097600 |
| H  | 4.78174400  | 1.73510200  | 3.86448000  | C | -2.93674500 | 1.27726500  | -1.82090600 |
| H  | 6.28979300  | 0.83118100  | 4.08876000  | C | -3.88341900 | 1.19620300  | -2.83558400 |
| H  | 5.62742000  | 1.05122500  | 2.46581000  | C | -4.20445200 | 0.00634800  | -3.48151000 |
| H  | 5.24834400  | -0.68951700 | 5.73823100  | C | -3.52983400 | -1.12974000 | -3.06862100 |
| H  | 3.71887600  | 0.18519400  | 5.62472600  | H | -2.74816400 | 2.24373800  | -1.36850500 |
| H  | 3.76032800  | -1.57631000 | 5.39831500  | H | -4.94563600 | -0.03652800 | -4.26929700 |
| C  | 4.56930700  | 0.44502700  | -3.69852400 | C | -1.81597600 | -2.27815400 | -1.57875600 |
| C  | 5.41526800  | 1.63621700  | -3.18599100 | C | -1.93647600 | -3.60073700 | -2.04006700 |
| C  | 5.36091100  | -0.87235500 | -3.51181500 | C | -1.15923700 | -4.60535900 | -1.48795500 |
| C  | 4.29642200  | 0.64522100  | -5.20076700 | H | -2.63796600 | -3.82665600 | -2.82809400 |
| H  | 4.87797500  | 2.58211700  | -3.30781100 | C | -0.16684900 | -2.96918300 | -0.04664600 |
| H  | 5.67857400  | 1.52881400  | -2.12968600 | C | -0.25532900 | -4.28680500 | -0.46936500 |
| H  | 6.34730200  | 1.69823800  | -3.75677700 | H | -1.24906300 | -5.62478000 | -1.84718300 |
| H  | 4.78252600  | -1.73230700 | -3.86420700 | H | 0.51845000  | -2.67616900 | 0.73630700  |
| H  | 6.29014800  | -0.82772500 | -4.08868700 | N | -0.91948700 | -1.99224600 | -0.58122000 |
| H  | 5.62803900  | -1.04797100 | -2.46565800 | F | -3.84269900 | -2.28619100 | -3.69888700 |
| H  | 5.24806600  | 0.69256200  | -5.73802700 | F | -4.52647300 | 2.31772900  | -3.21759300 |
| H  | 3.71893300  | -0.18273700 | -5.62454200 | C | 0.57562800  | -5.35430600 | 0.18429500  |
| H  | 3.75971500  | 1.57877300  | -5.39806200 | F | -0.15457100 | -6.09037400 | 1.05271800  |
| Ir | -0.81550200 | -0.00021600 | 0.00003300  | F | 1.07801600  | -6.21303300 | -0.72884500 |
|    |             |             |             | F | 1.61256900  | -4.83517900 | 0.87516800  |

\*Ir<sup>3+</sup>

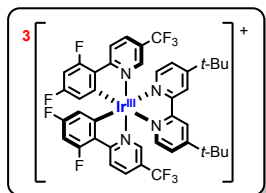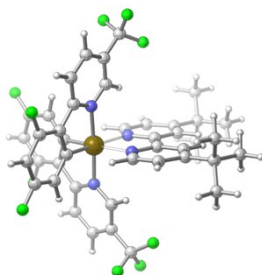

|    |             |             |             |   |             |             |             |
|----|-------------|-------------|-------------|---|-------------|-------------|-------------|
| C  | 2.10105500  | 0.02588100  | 0.71204800  | C | -2.05334000 | 3.54175400  | 2.00779500  |
| C  | 3.28028500  | 0.02224000  | 1.51654100  | C | -1.32459700 | 4.56368500  | 1.41495600  |
| C  | 3.23337300  | -0.08439700 | 2.88826500  | H | -2.73578900 | 3.75680700  | 2.81551900  |
| C  | 1.93400900  | -0.19623700 | 3.48153300  | C | -0.31709500 | 2.93921300  | -0.03319500 |
| C  | 0.81566100  | -0.20633300 | 2.68124100  | C | -0.44017800 | 4.26036900  | 0.37829900  |
| N  | 0.86039700  | -0.12354200 | 1.32992800  | H | -1.43616400 | 5.58478800  | 1.76148500  |
| H  | 4.23355100  | 0.11827100  | 1.01591600  | H | 0.35801200  | 2.64626600  | -0.82631600 |
| H  | 1.80596200  | -0.29178700 | 4.55276700  | N | -1.02997900 | 1.95552100  | 0.53456700  |
| H  | -0.17096200 | -0.30857900 | 3.11774500  | C | 0.33666300  | 5.33905000  | -0.32842300 |
| C  | 2.09476000  | 0.18934100  | -0.70024300 | F | 1.49166600  | 4.86496100  | -0.83955200 |
| C  | 3.27011700  | 0.30691300  | -1.50175700 | F | 0.63650400  | 6.35431700  | 0.50572200  |
| C  | 0.79747900  | 0.30343500  | -2.67199600 | F | -0.36905400 | 5.86158200  | -1.35552300 |
| C  | 3.21633600  | 0.41303600  | -2.87328100 | F | -3.89663000 | 2.16804700  | 3.70643400  |
| H  | 4.22712300  | 0.30026900  | -0.99905400 | F | -4.30017000 | -2.48126600 | 3.39772100  |
| C  | 1.91354600  | 0.40345200  | -3.46938500 | C | -2.43625900 | -1.29234400 | -2.08326800 |
| H  | -0.19345200 | 0.31172200  | -3.11078500 | C | -2.22438100 | -0.01420400 | -1.46684300 |
| H  | 1.77941900  | 0.49051200  | -4.54057200 | C | -2.94305000 | 1.10194800  | -1.92616500 |
| N  | 0.84685100  | 0.22020700  | -1.32091500 | C | -3.85871300 | 0.94557900  | -2.95640000 |
| C  | 4.48047600  | -0.08618100 | 3.78025100  | C | -4.09924200 | -0.28494600 | -3.56655100 |
| C  | 5.78297900  | 0.04007400  | 2.96920800  | C | -3.38058000 | -1.38318000 | -3.11242700 |
| C  | 4.40004000  | 1.10500500  | 4.76605000  | H | -2.80614500 | 2.08615500  | -1.49542300 |
| C  | 4.52992200  | -1.41061200 | 4.58093400  | H | -4.82053600 | -0.38816200 | -4.36770300 |
| H  | 5.90878700  | -0.79254800 | 2.26924700  | C | -1.63905500 | -2.40145300 | -1.56429500 |
| H  | 5.82004400  | 0.97564700  | 2.40148800  | C | -1.64183600 | -3.72701900 | -2.02273800 |
| H  | 6.64019300  | 0.03235700  | 3.64957600  | C | -0.80526300 | -4.66404700 | -1.43323700 |
| H  | 3.50866400  | 1.05323900  | 5.39817100  | H | -2.29101900 | -4.01146100 | -2.83641100 |
| H  | 5.27578700  | 1.10749000  | 5.42397600  | C | 0.00297100  | -2.94824500 | 0.03443900  |
| H  | 4.37713500  | 2.05801000  | 4.22709300  | C | 0.03308500  | -4.27094900 | -0.38759300 |
| H  | 5.40798300  | -1.42026800 | 5.23571000  | H | -0.79942000 | -5.68825300 | -1.78920200 |
| H  | 3.64434900  | -1.54225000 | 5.20956000  | H | 0.63457200  | -2.58813900 | 0.83533600  |
| H  | 4.59807500  | -2.27211700 | 3.90837400  | N | -0.81197100 | -2.04619100 | -0.53294000 |
| C  | 4.45974500  | 0.53695800  | -3.76189500 | F | -3.62908800 | -2.56281900 | -3.71339500 |
| C  | 4.38712400  | 1.86616400  | -4.55278700 | F | -4.54878600 | 2.01112300  | -3.38976900 |
| C  | 5.76662600  | 0.52617200  | -2.94815200 | C | 0.92748000  | -5.26507000 | 0.30394900  |
| C  | 4.49275600  | -0.64908000 | -4.75658200 | F | 0.24497200  | -5.98888000 | 1.21804600  |
| H  | 3.49387200  | 1.91938600  | -5.18208300 | F | 1.45816200  | -6.13811000 | -0.57620900 |
| H  | 4.37385500  | 2.72516600  | -3.87374100 | F | 1.94333600  | -4.65790200 | 0.95054600  |
| H  | 5.26131700  | 1.96239700  | -5.20574900 |   |             |             |             |
| H  | 5.88868000  | -0.40571900 | -2.38627600 |   |             |             |             |
| H  | 6.62095300  | 0.61761000  | -3.62603600 |   |             |             |             |
| H  | 5.81353200  | 1.36213800  | -2.24248200 |   |             |             |             |
| H  | 5.36772800  | -0.56622300 | -5.41032000 |   |             |             |             |
| H  | 4.55527000  | -1.60421100 | -4.22457000 |   |             |             |             |
| H  | 3.60306800  | -0.67450800 | -5.39267100 |   |             |             |             |
| Ir | -0.86144000 | -0.04206900 | 0.00216800  |   |             |             |             |
| C  | -2.56932200 | 1.03339000  | 2.08034500  |   |             |             |             |
| C  | -2.21602100 | -0.21526500 | 1.46836200  |   |             |             |             |
| C  | -2.80552500 | -1.40328300 | 1.93098000  |   |             |             |             |
| C  | -3.73341700 | -1.34676400 | 2.96060600  |   |             |             |             |
| C  | -4.11014700 | -0.14868200 | 3.56656800  |   |             |             |             |
| C  | -3.51842600 | 1.02150900  | 3.10899000  |   |             |             |             |
| H  | -2.55794500 | -2.36701800 | 1.50328800  |   |             |             |             |
| H  | -4.83864200 | -0.12408200 | 4.36749800  |   |             |             |             |
| C  | -1.89876000 | 2.22228300  | 1.55901900  |   |             |             |             |

## 1a

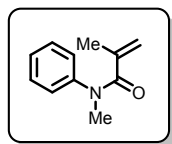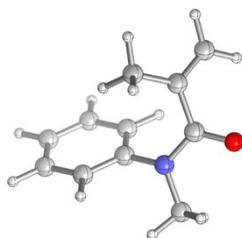

|   |             |             |             |
|---|-------------|-------------|-------------|
| C | 0.71175000  | 0.47004500  | -0.06501100 |
| C | 2.96249900  | 0.20770700  | 0.79069800  |
| C | 3.25825300  | -0.68262700 | -0.24546000 |
| H | 4.24458800  | -1.13083300 | -0.31413800 |
| H | 3.71668000  | 0.45067100  | 1.53297400  |
| C | 1.69423300  | 0.77869900  | 0.88583000  |
| H | 1.45608700  | 1.45455400  | 1.70131200  |
| O | -2.81033900 | 0.98013600  | -0.37409200 |
| C | -1.76552300 | 0.39622900  | -0.07263500 |
| C | -1.77972200 | -1.07679500 | 0.27166100  |
| C | -2.48261500 | -1.88949300 | -0.52565900 |
| H | -2.57569200 | -2.94995600 | -0.31067500 |
| H | -2.98053200 | -1.51569500 | -1.41440300 |
| C | 1.01442900  | -0.40625100 | -1.11412400 |
| H | 0.26100800  | -0.62736000 | -1.86238900 |
| C | 2.28067000  | -0.98942600 | -1.19319200 |
| H | 2.50480500  | -1.67263700 | -2.00676600 |
| N | -0.57803800 | 1.08877300  | 0.02291400  |
| C | -0.64278400 | 2.54174400  | -0.18647500 |
| H | -1.51462000 | 2.94366800  | 0.32918100  |
| H | 0.26332000  | 2.99806100  | 0.21133300  |
| H | -0.72492500 | 2.78691300  | -1.25184000 |
| C | -1.12437000 | -1.54849700 | 1.54781300  |
| H | -0.03853000 | -1.42408400 | 1.53219400  |
| H | -1.49826300 | -0.97863700 | 2.40665100  |
| H | -1.34587600 | -2.60517600 | 1.71823500  |

## 2a

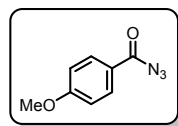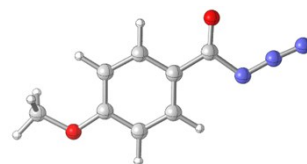

|   |             |             |             |
|---|-------------|-------------|-------------|
| C | 1.43860200  | -1.40854500 | -0.00000500 |
| C | 0.07654700  | -1.16324600 | 0.00001400  |
| C | -0.41066800 | 0.15832100  | -0.00001900 |
| C | 0.50720700  | 1.21971000  | -0.00006600 |
| C | 1.87692800  | 0.98624400  | -0.00009100 |
| C | 2.35128900  | -0.33676300 | -0.00011500 |
| H | 1.82681400  | -2.42132300 | 0.00005500  |
| H | -0.61966800 | -1.99401100 | 0.00012000  |
| H | 0.13029600  | 2.23665800  | -0.00012600 |
| H | 2.56222000  | 1.82428500  | -0.00003300 |
| C | -1.84686300 | 0.48090800  | 0.00002800  |
| O | -2.31595800 | 1.60844600  | 0.00002700  |
| N | -2.67647000 | -0.69391600 | 0.00001300  |
| N | -3.89869600 | -0.46466100 | 0.00002600  |
| N | -5.02712200 | -0.35903200 | 0.00001500  |
| O | 3.65966600  | -0.68136000 | -0.00012500 |
| C | 4.64559600  | 0.35540400  | 0.00018400  |
| H | 5.60909800  | -0.15340600 | 0.00034800  |
| H | 4.56305600  | 0.98115400  | -0.89456900 |
| H | 4.56270900  | 0.98101000  | 0.89503100  |

## \*2a

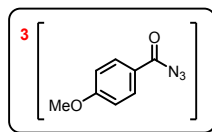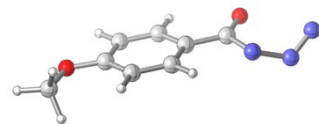

|   |             |             |             |
|---|-------------|-------------|-------------|
| C | 1.64274500  | -0.99279100 | -0.08417100 |
| C | 0.25475100  | -0.95378900 | -0.11819000 |
| C | -0.43547500 | 0.27063800  | -0.05047200 |
| C | 0.30360500  | 1.46954600  | 0.04866600  |
| C | 1.68207200  | 1.44198200  | 0.08293900  |
| C | 2.36659600  | 0.20810500  | 0.01758400  |
| H | 2.15092500  | -1.94665900 | -0.14248200 |
| H | -0.30080300 | -1.88012800 | -0.20530600 |
| H | -0.22933400 | 2.41244900  | 0.10115100  |
| H | 2.26407200  | 2.35365700  | 0.16190800  |
| C | -1.89920700 | 0.35209300  | -0.06843300 |
| O | -2.55785200 | 1.38264000  | -0.12852600 |
| N | -2.53277500 | -0.94018400 | -0.05251100 |
| N | -3.82603400 | -0.91085300 | 0.45351400  |
| N | -4.72396600 | -0.42921400 | -0.16612600 |
| O | 3.71069200  | 0.28918100  | 0.05778200  |
| C | 4.48273400  | -0.91708300 | 0.00808400  |
| H | 4.30998200  | -1.45561800 | -0.92889000 |
| H | 5.52387600  | -0.60163000 | 0.06179200  |
| H | 4.25105900  | -1.56708500 | 0.85759700  |

## 2c

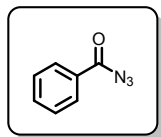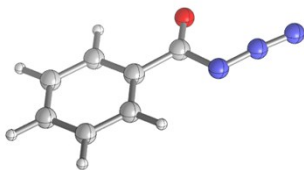

|   |             |             |             |
|---|-------------|-------------|-------------|
| C | -2.34143800 | -1.42596900 | 0.00000000  |
| C | -0.97013900 | -1.17879400 | -0.00000200 |
| C | -0.49804800 | 0.14309300  | -0.00000200 |
| C | -1.41035300 | 1.21053800  | 0.00000000  |
| C | -2.77864800 | 0.95808400  | 0.00000200  |
| C | -3.24540300 | -0.36034500 | 0.00000200  |
| H | -2.70510600 | -2.44854500 | 0.00000000  |
| H | -0.26570400 | -2.00260000 | -0.00000400 |
| H | -1.02950400 | 2.22585700  | 0.00000000  |
| H | -3.48175600 | 1.78492800  | 0.00000400  |
| H | -4.31330200 | -0.55666300 | 0.00000400  |
| C | 0.94716700  | 0.46963700  | -0.00000500 |
| O | 1.40541400  | 1.59968000  | -0.00000100 |
| N | 1.77688100  | -0.69888600 | -0.00000100 |
| N | 3.00008500  | -0.46686900 | 0.00000200  |
| N | 4.12778000  | -0.36251400 | 0.00000400  |

### IM1

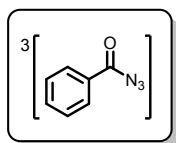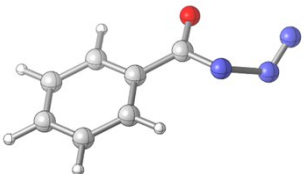

|   |             |             |             |
|---|-------------|-------------|-------------|
| C | 2.38878300  | -1.36990400 | -0.01044500 |
| C | 1.01407900  | -1.17874700 | -0.12777600 |
| C | 0.48607800  | 0.12319300  | -0.09508900 |
| C | 1.34297700  | 1.22734400  | 0.05137800  |
| C | 2.71427900  | 1.02877400  | 0.16485400  |
| C | 3.23752600  | -0.26922100 | 0.13415100  |
| H | 2.79842200  | -2.37427700 | -0.03555800 |
| H | 0.35291400  | -2.03001600 | -0.24893700 |
| H | 0.91807100  | 2.22477400  | 0.07694100  |
| H | 3.37738500  | 1.88021000  | 0.27847700  |
| H | 4.30877400  | -0.42146600 | 0.22266000  |
| C | -0.96577800 | 0.37321300  | -0.19323700 |
| O | -1.49702000 | 1.47798500  | -0.21124000 |
| N | -1.76964300 | -0.79229200 | -0.37763600 |
| N | -3.03709600 | -0.70890400 | 0.48806100  |
| N | -3.91998500 | -0.02895100 | 0.15433400  |

### TS1

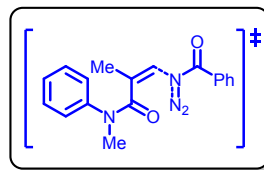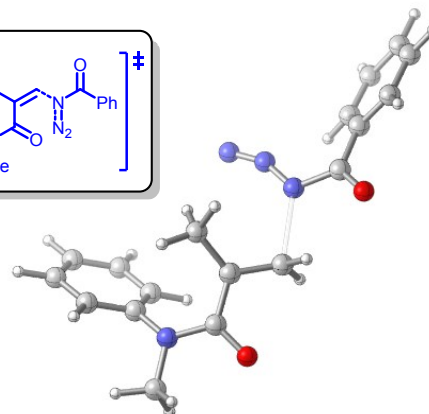

|   |             |             |             |
|---|-------------|-------------|-------------|
| C | 3.69147900  | 0.29369300  | 0.11237800  |
| C | 4.75392300  | 2.44168100  | -0.25111000 |
| C | 4.04594300  | 2.98323900  | 0.82558900  |
| H | 4.18188500  | 4.02469900  | 1.09989200  |
| H | 5.43882300  | 3.06265000  | -0.82055200 |
| C | 4.57531500  | 1.10718600  | -0.61168600 |
| H | 5.10781100  | 0.69383600  | -1.46265000 |
| O | 2.22334000  | -2.94364000 | -0.07563100 |
| C | 2.30198500  | -1.71685200 | -0.27363800 |
| C | 1.08864800  | -0.95851400 | -0.61086100 |
| C | 2.99862100  | 0.83263800  | 1.20532400  |
| H | 2.33800000  | 0.19826700  | 1.78758100  |
| C | 3.16642900  | 2.17535100  | 1.54837200  |
| H | 2.62079700  | 2.58301200  | 2.39401000  |
| N | 3.53603000  | -1.08107900 | -0.24734300 |
| C | 4.70792300  | -1.95406600 | -0.10267100 |
| H | 4.62228000  | -2.79793000 | -0.78741800 |
| H | 5.60624400  | -1.38337400 | -0.33669500 |
| H | 4.79163000  | -2.34482300 | 0.91871100  |
| C | 1.06443100  | 0.27194000  | -1.46311300 |
| H | 0.82313700  | 1.17052700  | -0.87519100 |
| H | 2.02126800  | 0.44945200  | -1.95626200 |
| H | 0.28363300  | 0.17773200  | -2.22657200 |
| C | -0.17029800 | -1.62005700 | -0.23388700 |
| H | -0.70021700 | -2.22800900 | -0.96277800 |
| C | -0.33519300 | -1.89302100 | 0.80384200  |
| H | -3.10605900 | -0.64186500 | -0.42268400 |
| O | -3.12651200 | -1.76595100 | -0.89787700 |
| C | -4.36368200 | 0.11280600  | -0.12669800 |
| C | -4.50702400 | 0.96938400  | 0.97515900  |
| C | -5.46142300 | -0.12229500 | -0.96922800 |
| C | -5.73053700 | 1.59339900  | 1.21751700  |
| H | -3.68485200 | 1.12964600  | 1.66380400  |
| C | -6.67467100 | 0.51942600  | -0.73494600 |
| H | -5.34661800 | -0.80211600 | -1.80633600 |
| C | -6.81095200 | 1.37837700  | 0.35926200  |
| H | -5.83944400 | 2.24403500  | 2.07929800  |
| H | -7.51406800 | 0.34706400  | -1.40117300 |
| H | -7.75876800 | 1.87378300  | 0.54608200  |
| N | -1.84371600 | -0.06183100 | -0.14423500 |
| N | -1.76457700 | 1.18624100  | 0.08090400  |
| N | -1.22388400 | 2.18580500  | 0.27609300  |



## IM2

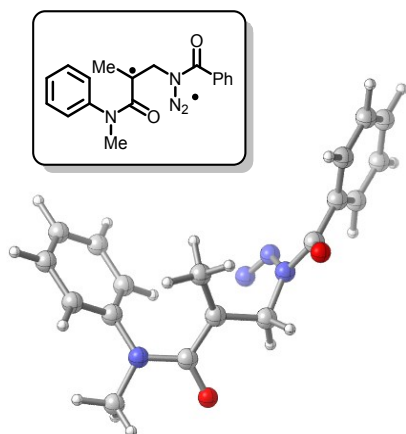

|   |             |             |             |
|---|-------------|-------------|-------------|
| C | 3.48459300  | 0.43971800  | -0.00123100 |
| C | 4.39345700  | 2.54630600  | -0.78116500 |
| C | 3.62570900  | 3.23528600  | 0.16213100  |
| H | 3.67934900  | 4.31770100  | 0.22393500  |
| H | 5.04231500  | 3.09200900  | -1.45943000 |
| C | 4.32117000  | 1.15718100  | -0.86864500 |
| H | 4.90002200  | 0.62498200  | -1.61704200 |
| O | 2.27949400  | -2.87895100 | 0.45758600  |
| C | 2.26247300  | -1.71188900 | 0.02353100  |
| C | 1.00309700  | -1.14393900 | -0.46833000 |
| C | 2.73103500  | 1.12959900  | 0.95822000  |
| H | 2.10218500  | 0.57648100  | 1.64841200  |
| C | 2.79305400  | 2.52258200  | 1.02646500  |
| H | 2.20071800  | 3.04741900  | 1.76989200  |
| N | 3.43978700  | -0.98758900 | -0.07919500 |
| C | 4.67561200  | -1.72059100 | 0.22521300  |
| H | 4.66379400  | -2.68446000 | -0.28377300 |
| H | 5.52840400  | -1.13598300 | -0.11809300 |
| H | 4.77775800  | -1.89912500 | 1.30229400  |
| C | 0.87208800  | -0.09039900 | -1.52120600 |
| H | 0.52895400  | 0.86613800  | -1.10270800 |
| H | 1.81669900  | 0.09898900  | -2.03180900 |
| H | 0.12194400  | -0.39856100 | -2.25811300 |
| C | -0.23770800 | -1.87334500 | -0.01972100 |
| H | -0.58067100 | -2.56839400 | -0.79300700 |
| H | -0.04071500 | -2.44412100 | 0.88937000  |
| C | -2.42192000 | -0.81296500 | -0.68497400 |
| O | -2.30519000 | -1.30505600 | -1.80170700 |
| C | -3.64401100 | -0.05466000 | -0.28088900 |
| C | -4.24475000 | -0.16641400 | 0.98254900  |
| C | -4.25936700 | 0.72318800  | -1.27392800 |
| C | -5.43690800 | -0.50627500 | 1.24798500  |
| H | -3.80045600 | -0.79165300 | 1.74801300  |
| C | -5.43847900 | 1.41040200  | -0.99682200 |
| H | -3.80138100 | 0.78523000  | -2.25513900 |
| C | -6.02934300 | 1.30222900  | 0.26499900  |
| H | -5.90345600 | 0.40637600  | 2.22284500  |
| H | -5.89916400 | 2.02379900  | -1.76467300 |
| H | -6.95272300 | 1.83153900  | 0.47946700  |
| N | -1.38436100 | -0.98225200 | 0.23828200  |
| N | -1.37503800 | -0.17934400 | 1.37978900  |
| N | -0.51993500 | -0.23191400 | 2.20218700  |

## TS2

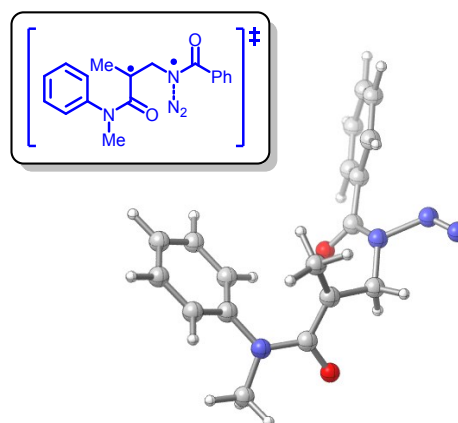

|   |             |             |             |
|---|-------------|-------------|-------------|
| C | -3.11184400 | 0.71558200  | -0.03656200 |
| C | -3.94048600 | 2.68636400  | 1.10606900  |
| C | -2.83811900 | 3.41922900  | 0.65746700  |
| H | -2.73173700 | 4.46553500  | 0.92657100  |
| H | -4.69237000 | 3.15922100  | 1.73066200  |
| C | -4.07590900 | 1.34102900  | 0.76795600  |
| H | -4.92088900 | 0.76767000  | 1.13635200  |
| O | -2.28790000 | -2.53919200 | -1.22557200 |
| C | -2.23153800 | -1.56230500 | -0.45557000 |
| C | -1.09887600 | -1.42464600 | 0.46425500  |
| C | -2.01513900 | 1.45505800  | -0.50111100 |
| H | -1.27215500 | 0.98001400  | -1.13329800 |
| C | -1.87680700 | 2.79689600  | -0.14071600 |
| H | -1.02066700 | 3.35946000  | -0.50115200 |
| N | -3.28071300 | -0.65638000 | -0.40387900 |
| C | -4.46518900 | -1.00248900 | -1.20056200 |
| H | -4.73471600 | -2.04384400 | -1.02334800 |
| H | -5.29187600 | -0.35655500 | -0.90737900 |
| H | -4.27605500 | -0.87222500 | -2.27283300 |
| C | -1.13845400 | -0.75421200 | 1.80008000  |
| H | -0.56896200 | 0.18473200  | 1.80531200  |
| H | -2.15698400 | -0.52314500 | 2.11398600  |
| H | -0.67705900 | -1.40246000 | 2.55551900  |
| C | 0.12745000  | -2.22171400 | 0.10073000  |
| H | 0.18971700  | -3.10753300 | 0.74377000  |
| H | 0.07355600  | -2.55501900 | -0.93698700 |
| C | 1.72250900  | -0.45972500 | -0.56096500 |
| O | 0.93041300  | -0.15405500 | -1.45182800 |
| C | 3.01459700  | 0.25807400  | -0.36689800 |
| C | 3.59058800  | 0.46512300  | 0.89582000  |
| C | 3.62440200  | 0.80594600  | -1.50565300 |
| C | 4.76943100  | 1.20081700  | 1.01116900  |
| H | 3.10704300  | 0.07654800  | 1.78480000  |
| C | 4.81036700  | 1.52620700  | -1.38751800 |
| H | 3.16160700  | 0.65517000  | -2.47503900 |
| C | 5.38434600  | 1.72464800  | -0.12846900 |
| H | 5.20519800  | 1.36802000  | 1.99111100  |
| H | 5.28459700  | 1.93597600  | -2.27374800 |
| H | 6.30559400  | 2.29167500  | -0.03539800 |
| N | 1.36045400  | -1.45262900 | 0.34479700  |
| N | 2.60523700  | -2.30284600 | 0.86195400  |
| N | 2.47093100  | -3.31421900 | 1.39946400  |

### IM3

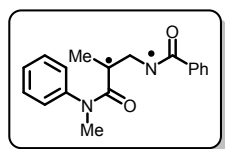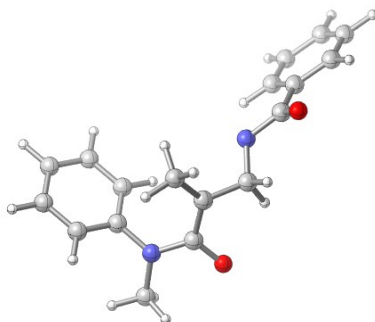

|   |             |             |             |
|---|-------------|-------------|-------------|
| C | -3.35016500 | 0.31018900  | -0.22776100 |
| C | -4.79898100 | 1.89903800  | 0.89023400  |
| C | -3.86967100 | 2.91821300  | 0.66322800  |
| H | -4.07032800 | 3.92708200  | 1.00998900  |
| H | -5.72294500 | 2.11180000  | 1.41931200  |
| C | -4.54112800 | 0.60074500  | 0.45371900  |
| H | -5.25292900 | -0.19455700 | 0.65167000  |
| O | -1.53878800 | -2.49180600 | -1.45651300 |
| C | -1.86208100 | -1.62486300 | -0.62271300 |
| C | -0.96003900 | -1.31079200 | 0.49012800  |
| C | -2.42877200 | 1.33754500  | -0.47339100 |
| H | -1.51841100 | 1.12259400  | -1.02353700 |
| C | -2.68429300 | 2.63127800  | -0.01554800 |
| H | -1.96088100 | 3.41805700  | -0.20691900 |
| N | -3.10740000 | -1.01894200 | -0.69639700 |
| C | -4.02658800 | -1.55582500 | -1.70836800 |
| H | -4.03192000 | -2.64460700 | -1.65622600 |
| H | -5.02918800 | -1.17606500 | -1.51468900 |
| H | -3.72355200 | -1.25915300 | -2.71964900 |
| C | -1.36877900 | -0.81373700 | 1.83823300  |
| H | -0.95539900 | 0.18576600  | 2.03235200  |
| H | -2.44963600 | -0.76378200 | 1.96549700  |
| H | -0.95562800 | -1.47344100 | 2.61318500  |
| C | 0.48348600  | -1.67961800 | 0.30070000  |
| H | 0.80490300  | -2.46715500 | 1.00346100  |
| H | 0.61742700  | -2.09723200 | -0.71021800 |
| N | 1.35569900  | -0.53433100 | 0.44046100  |
| C | 2.66488700  | -0.78480900 | 0.84420300  |
| O | 2.89948200  | -1.58789800 | 1.75237700  |
| C | 3.71914600  | 0.03868100  | 0.19508200  |
| C | 3.40086400  | 1.05328400  | -0.72138200 |
| C | 5.06293900  | -0.23002200 | 0.49851100  |
| C | 4.41854900  | 1.78850600  | -1.32701400 |
| H | 2.36096400  | 1.26492900  | -0.94452800 |
| C | 6.07599800  | 0.50706000  | -0.10753800 |
| H | 5.29257400  | -1.01868700 | 1.20695500  |
| C | 5.75464000  | 1.51696000  | -1.02105200 |
| H | 4.17070200  | 2.57492000  | -2.03296800 |
| H | 7.11467100  | 0.29724000  | 0.12814500  |
| H | 6.54586500  | 2.09185200  | -1.49282900 |

### N<sub>2</sub>

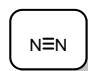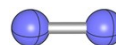

|   |            |            |             |
|---|------------|------------|-------------|
| N | 0.00000000 | 0.00000000 | 0.55264300  |
| N | 0.00000000 | 0.00000000 | -0.55264300 |

### TS3

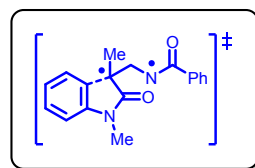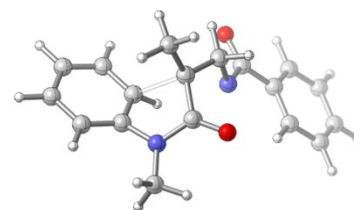

|   |             |             |             |
|---|-------------|-------------|-------------|
| C | -2.83389800 | -0.33452000 | -0.85836200 |
| O | -0.87813200 | -2.35797900 | 1.23669800  |
| C | -1.44585900 | -1.41207600 | 0.69324300  |
| C | -1.27781300 | 0.02644000  | 1.12765600  |
| N | -2.33365000 | -1.55281200 | -0.35697000 |
| C | -2.85993300 | -2.85561100 | -0.73905500 |
| H | -2.19643200 | -3.61510000 | -0.32682100 |
| H | -3.86895700 | -3.01242300 | -0.34125100 |
| H | -2.88894500 | -2.94150500 | -1.82758300 |
| C | -2.31323600 | 0.52332500  | 2.10854800  |
| H | -2.23653900 | 1.60821400  | 2.23412400  |
| H | -3.32784400 | 0.28767300  | 1.77565500  |
| H | -2.17040500 | 0.06256800  | 3.09661800  |
| C | 0.14125000  | 0.42885500  | 1.45008300  |
| H | 0.19983400  | 1.48519200  | 1.74671400  |
| H | 0.49473500  | -0.15315600 | 2.32622200  |
| N | 1.06360400  | 0.14924900  | 0.37738200  |
| C | 2.17751700  | 0.97237100  | 0.25046400  |
| O | 2.05930300  | 2.19824500  | 0.34312600  |
| C | 3.45408200  | 0.29767700  | -0.10066800 |
| C | 3.51774100  | -1.08907900 | -0.30937900 |
| C | 4.62005900  | 1.07254300  | -0.19782200 |
| C | 4.73793000  | -1.69147400 | -0.61113600 |
| H | 2.61250700  | -1.68284400 | -0.24123900 |
| C | 5.83590900  | 0.46735000  | -0.50194800 |
| H | 4.55385300  | 2.14226300  | -0.03063400 |
| C | 5.89580200  | -0.91515900 | -0.70856200 |
| H | 4.78592300  | -2.76350300 | -0.77432100 |
| H | 6.73686900  | 1.06811000  | -0.57755900 |
| H | 6.84498300  | -1.38616600 | -0.94587900 |
| C | -1.86755100 | 0.72513500  | -0.79594800 |
| H | -0.84015800 | 0.49444400  | -1.06692200 |
| C | -2.33409900 | 2.05188500  | -1.01631900 |
| H | -1.62158800 | 2.87113400  | -1.01281900 |
| C | -3.67571800 | 2.28934700  | -1.29741000 |
| H | -4.01646200 | 3.30542900  | -1.47473300 |
| C | -4.58158700 | 1.22515300  | -1.41766500 |
| H | -5.61884700 | 1.41809100  | -1.67168900 |
| C | -4.16103000 | -0.09570500 | -1.17369700 |
| H | -4.87764300 | -0.91045600 | -1.19329700 |

### IM4

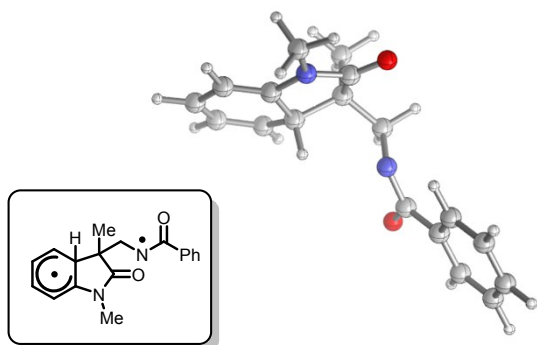

|   |             |             |             |
|---|-------------|-------------|-------------|
| C | -2.86428800 | -0.39705200 | -0.71477500 |
| C | -4.42777900 | 1.15984900  | -1.64702900 |
| C | -3.80607800 | 2.22353800  | -0.93687600 |
| H | -4.24657700 | 3.21557300  | -0.99803600 |
| H | -5.30431300 | 1.35598300  | -2.25487900 |
| C | -3.97702600 | -0.17655200 | -1.47875400 |
| H | -4.54409300 | -1.00225500 | -1.89727700 |
| O | -0.89304200 | -2.32429000 | 1.39611200  |
| C | -1.46922100 | -1.42576100 | 0.79663400  |
| C | -1.40625700 | 0.08072200  | 1.12560000  |
| C | -1.98745100 | 0.70538200  | -0.17905900 |
| C | -1.11929600 | 0.77867400  | -0.86616700 |
| C | -2.68755500 | 2.03253600  | -0.16873200 |
| H | -2.22822500 | 2.86110600  | 0.36209600  |
| N | -2.35205400 | -1.60553600 | -0.25202100 |
| C | -2.80114200 | -2.91674400 | -0.69018300 |
| H | -2.20811500 | -3.66355200 | -0.16321600 |
| H | -3.86054900 | -3.06000200 | -0.45444800 |
| H | -2.65818400 | -3.02511600 | -1.76850700 |
| C | -2.29911600 | 0.33394000  | 2.35715300  |
| H | -2.27820100 | 1.39181700  | 2.63394600  |
| H | -3.33776100 | 0.05995200  | 2.15175800  |
| H | -1.94910900 | -0.25480700 | 3.20996500  |
| C | 0.03515400  | 0.50235300  | 1.44316100  |
| H | 0.08574200  | 1.55102300  | 1.76730600  |
| H | 0.39175200  | -0.10516600 | 2.29271600  |
| N | 0.93905800  | 0.26823100  | 0.34982000  |
| C | 2.06479900  | 1.07843500  | 0.25048500  |
| O | 1.96501700  | 2.30090000  | 0.39451000  |
| C | 3.32930900  | 0.40039200  | -0.13608900 |
| C | 3.37195500  | -0.97784000 | -0.39916100 |
| C | 4.50553100  | 1.16208400  | -0.21113700 |
| C | 4.58140200  | -1.58503200 | -0.73281400 |
| H | 2.45894200  | -1.56128000 | -0.34737000 |
| C | 5.71063800  | 0.55230900  | -0.54727800 |
| H | 4.45568700  | 2.22527100  | -0.00188500 |
| C | 5.74954700  | -0.82174400 | -0.80808300 |
| H | 4.61305200  | -2.65046000 | -0.93786900 |
| H | 6.61953700  | 1.14293700  | -0.60577700 |
| H | 6.69035100  | -1.29634000 | -1.07031100 |

### TS4

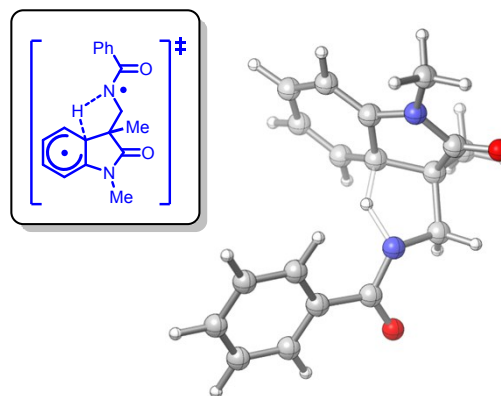

|   |             |             |             |
|---|-------------|-------------|-------------|
| C | -2.07868000 | -0.48966800 | -0.71931300 |
| C | -2.48685700 | 1.10253800  | -2.44858200 |
| C | -2.17172600 | 2.16983200  | -1.52299900 |
| H | -2.31694000 | 3.19331400  | -1.85909600 |
| H | -2.80306000 | 1.34688700  | -3.45561800 |
| C | -2.49476800 | -0.23418600 | -2.00592100 |
| H | -2.85569600 | -1.03043300 | -2.64853900 |
| O | -1.88429000 | -2.36769200 | 2.19120000  |
| C | -1.86448600 | -1.47388500 | 1.35946700  |
| C | -1.59654600 | 0.01712000  | 1.62356200  |
| C | -1.47750900 | 0.55989900  | 0.18108500  |
| H | -0.15876000 | 0.35195800  | 0.21023500  |
| C | -1.73541000 | 1.94356300  | -0.25026000 |
| H | -1.51558300 | 2.76658000  | 0.42160000  |
| N | -2.15028000 | -1.65845600 | 0.00454000  |
| C | -2.60468700 | -2.93488200 | -0.52649400 |
| H | -2.54372200 | -3.66847500 | 0.27594000  |
| H | -3.63830800 | -2.85305300 | -0.87510200 |
| H | -1.96754800 | -3.24007100 | -1.36023700 |
| C | -2.73370100 | 0.59252500  | 2.48138400  |
| H | -2.57372800 | 1.65970100  | 2.65592000  |
| H | -3.70424000 | 0.46686700  | 1.99240000  |
| H | -2.76869900 | 0.08371000  | 3.44913000  |
| C | -0.20396800 | 0.20516300  | 2.27642600  |
| H | -0.13516200 | 1.18121800  | 2.77059600  |
| H | -0.01280200 | -0.56897800 | 3.02822400  |
| N | 0.73202600  | 0.09329600  | 1.15901200  |
| C | 1.89183400  | 0.82562400  | 1.20459100  |
| O | 2.30314000  | 1.33074100  | 2.26122100  |
| C | 2.66362900  | 0.93150500  | -0.07124900 |
| C | 2.37711700  | 0.13532500  | -1.19120600 |
| C | 3.71159700  | 1.86204500  | -0.13885400 |
| C | 3.12307100  | 0.27669600  | -2.36097300 |
| H | 1.58482100  | -0.60302800 | -1.13769900 |
| C | 4.45307600  | 2.00400400  | -1.30913200 |
| H | 3.92773600  | 2.46690200  | 0.73523400  |
| C | 4.15947900  | 1.21162300  | -2.42334500 |
| H | 2.89935200  | -0.34616600 | -3.22168000 |
| H | 5.25877600  | 2.73043200  | -1.35517700 |
| H | 4.73847100  | 1.32074800  | -3.33554100 |

3c

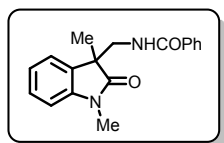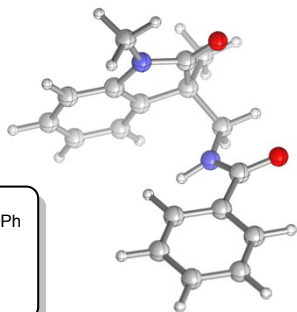

|   |             |             |             |
|---|-------------|-------------|-------------|
| C | 2.18332800  | 0.85459200  | 0.58045700  |
| C | 2.81633600  | 2.93880000  | -0.39817700 |
| C | 2.83979900  | 2.34239500  | -1.66003400 |
| H | 3.09837800  | 2.93311300  | -2.53301700 |
| H | 3.05711400  | 3.99272900  | -0.29668700 |
| C | 2.48680400  | 2.20162700  | 0.74818100  |
| H | 2.47142300  | 2.66991600  | 1.72636500  |
| O | 1.26939500  | -2.32998900 | 1.62472100  |
| C | 1.59856300  | -1.32407600 | 1.00870800  |
| C | 1.83452800  | -1.22430300 | -0.51622200 |
| C | 2.53172100  | 0.98021300  | -1.80678000 |
| H | 2.55388000  | 0.51832800  | -2.78994000 |
| N | 1.82956400  | -0.08474700 | 1.56421500  |
| C | 1.70996400  | 0.19895300  | 2.98232800  |
| H | 1.42344600  | -0.72745500 | 3.47974900  |
| H | 2.66316300  | 0.55057600  | 3.38909600  |
| H | 0.94414000  | 0.95983600  | 3.16242000  |
| C | 2.96857800  | -2.18580700 | -0.92372100 |
| H | 3.13641000  | -2.14185800 | -2.00376000 |
| H | 3.90359600  | -1.92220100 | -0.42243200 |
| H | 2.70634100  | -3.21218000 | -0.65135400 |
| C | 0.53803200  | -1.62111900 | -1.26345400 |
| H | 0.73709300  | -1.61468300 | -2.34176500 |
| H | 0.24988000  | -2.63331300 | -0.97558500 |
| C | -1.78382300 | -1.22511900 | -0.49817700 |
| O | -2.00119100 | -2.42591800 | -0.31143000 |
| C | -2.84177900 | -0.18982700 | -0.23430800 |
| C | -2.54888700 | 1.15085600  | 0.05691200  |
| C | -4.17929900 | -0.60918800 | -0.25590600 |
| C | -3.57989800 | 2.05776300  | 0.30487100  |
| H | -1.51956900 | 1.48970700  | 0.12495800  |
| C | -5.20830200 | 0.29898600  | -0.01666800 |
| H | -4.39313400 | -1.65178300 | -0.46460900 |
| C | -4.91040800 | 1.63569500  | 0.26269300  |
| H | -3.34274400 | 3.09117400  | 0.53818000  |
| H | -6.24130800 | -0.03413700 | -0.04575000 |
| H | -5.71131200 | 2.34368000  | 0.45339100  |
| C | 2.20270400  | 0.23731300  | -0.68178900 |
| N | -0.58777700 | -0.75556300 | -0.95699500 |
| H | -0.52271100 | 0.21144900  | -1.23960700 |

### XI-3. Triplet spin density diagrams of the intermediates of the proposed reaction mechanism

IM1 (isosurface value = 0.07 au)

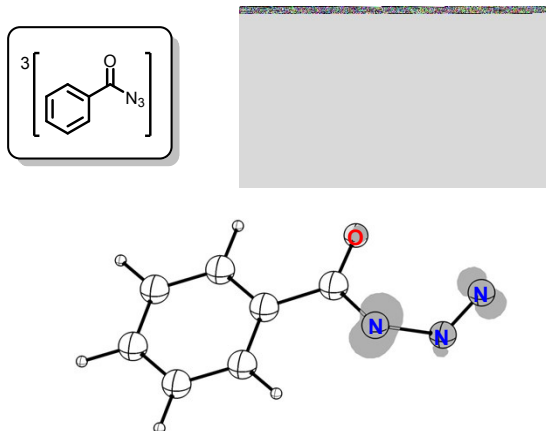

IM3 (isosurface value = 0.07 au)

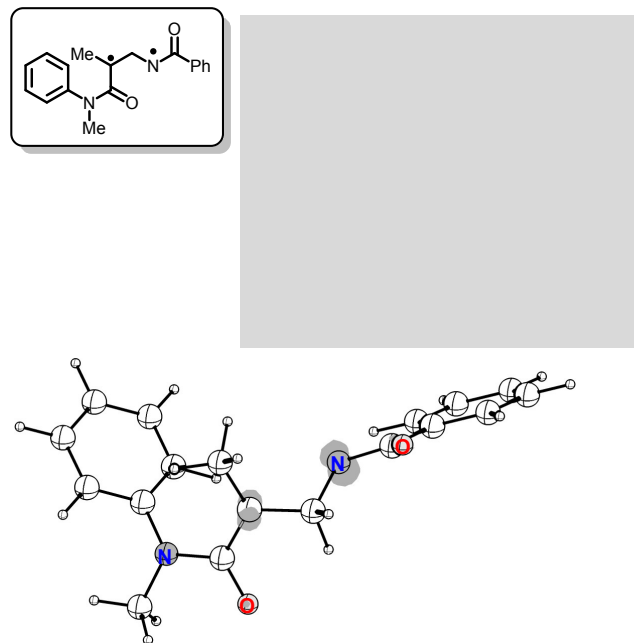

IM2 (isosurface value = 0.07 au)

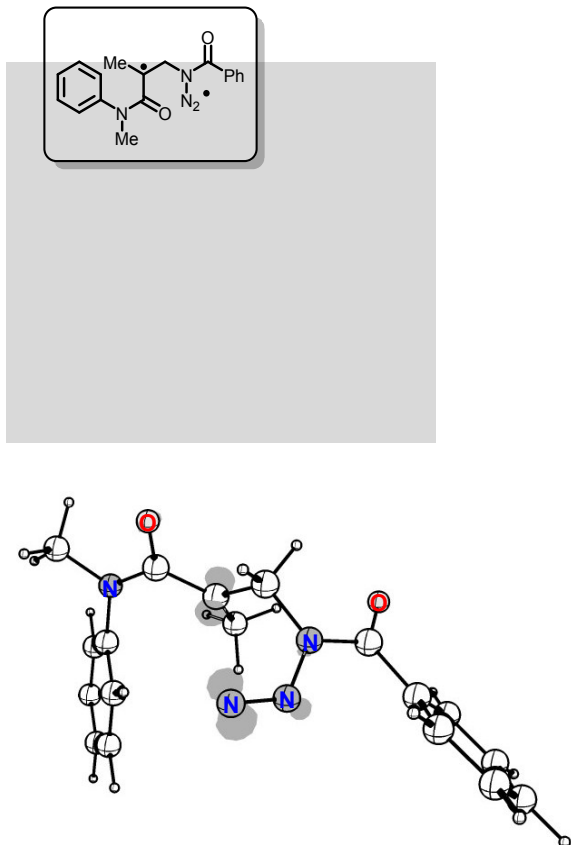

IM4 (isosurface value = 0.03 au)

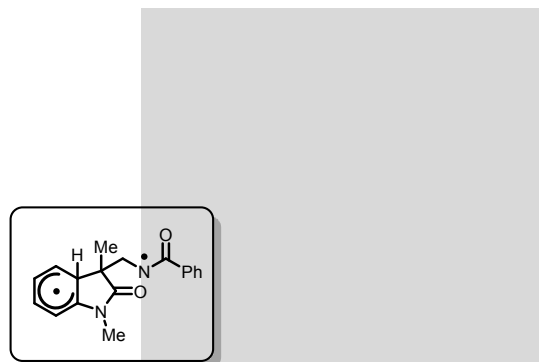

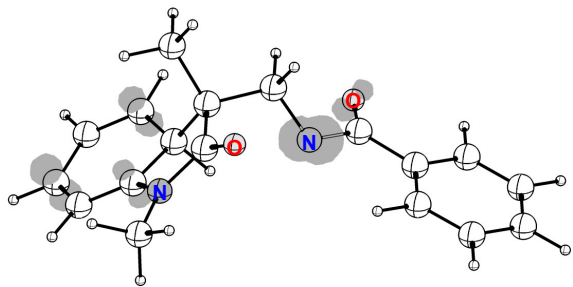

## XII. References

- [S1] A. Singh, K. Teegardin, M. Kelly, K. S. Prasad, S. Krishnan and J. D. Weaver *J. Organomet. Chem.* 2015, **776**, 51.
- [S2] J. Frey, T. Kraus, V. Heitz and J.-P. Sauvage *Chem. Eur. J.* 2007, **13**, 7584.
- [S3] J. Ryu, J. Kwak, K. Shin, D. Lee and S. Chang, *J. Am. Chem. Soc.* 2013, **135**, 12861.
- [S4] E. Brachet, T. Ghosh, I. Ghosh and B. Koenig, *Chem. Sci.* 2015, **6**, 987.
- [S5] K. Jones, M. Thompson and C. Wright, *J. Chem. Soc., Chem. Commun.* 1986, **22**, 715.
- [S6] A. Pinto, Y. Jia, L. Neuville and J. Zhu, *Chem. Eur. J.* 2007, **13**, 961.
- [S7] H. Wei, T. Piou, J. Dufour, L. Neuville and J. Zhu, *Org. Lett.* 2011, **13**, 2244.
- [S8] Y. M. Li, M. Sun, H. L. Wang, Q. P. Tian and S. D. Yang, *Angew. Chem., Int. Ed.* 2013, **52**, 3972.
- [S9] S. Scholz, E. P. Farney, S. Kim, D. M. Bates and T. P. Yoon, *Angew. Chem. Int. Ed.* 2016, **55**, 2239.
- [S10] (a) C. Lee, W. Yang and R. G. Parr, *Phys. Rev. B* 1988, **37**, 785. (b) A. D. Becke, *J. Chem. Phys.* 1993, **98**, 5648.
- [S11] (a) T. H. Dunning and P. J. Hay, In *Modern Theoretical Chemistry*; H. F. Schaefer, Ed.; Plenum: New York, 1976; Vol. **3**, 1. (b) P. J. Hay and W. R. Wadt, *J. Chem. Phys.* 1985, **82**, 270. (c) W. R. Wadt and P. J. Hay, *J. Chem. Phys.* 1985, **82**, 284. (d) P. J. Hay and W. R. Wadt, *J. Chem. Phys.* 1985, **82**, 299.
- [S12] For the single point calculations, we tested total four basis sets for iridium atom (LANL2DZ, LANL2TZ, LANL2TZ(f), and SDD). Upon comparison with the experimental  $E_{ST} = 60.8$  kcal/mol of the photocatalyst,  $[\text{Ir}\{\text{dF}(\text{CF}_3)\text{ppy}\}_2(\text{dtbbpy})]^+$  ( $E_{ST}$  : the energy gap between the ground singlet state and the first excited triplet triplet state), LANL2DZ gave the closest theoretical value (61.0 kcal/mol) while other basis sets were less successful in predictability; LANL2TZ (62.7 kcal/mol), LANL2TZ(f) (61.8 kcal/mol), and SDD (64.8 kcal/mol).
- [S13] J. Tomasi, B. Mennucci and R. Cammi, *Chem. Rev.* 2005, **105**, 2999.
- [S14] M. J. Frisch, G. W. Trucks, H. B. Schlegel, G. E. Scuseria, M. A. Robb, J. R. Cheeseman, G. Scalmani, V. Barone, B. Mennucci, G. A. Petersson, H. Nakatsuji, M. Caricato, X. Li, H. P. Hratchian, A. F. Izmaylov, J. Bloino, G. Zheng, J. L. Sonnenberg, M. Hada, M. Ehara, K.

Toyota, R. Fukuda, J. Hasegawa, M. Ishida, T. Nakajima, Y. Honda, O. Kitao, H. Nakai, T. Vreven, Montgomery, J. A. Jr., J. E. Peralta, F. Ogliaro, M. Bearpark, J. J. Heyd, E. Brothers, K. N. Kudin, V. N. Staroverov, R. Kobayashi, J. Normand, K. Raghavachari, A. Rendell, J. C. Burant, S. S. Iyengar, J. Tomasi, M. Cossi, N. Rega, J. M. Millam, M. Klene, J. E. Knox, J. B. Cross, V. Bakken, C. Adamo, J. Jaramillo, R. Gomperts, R. E. Stratmann, O. Yazyev, A. J. Austin, R. Cammi, C. Pomelli, J. W. Ochterski, R. L. Martin, K. Morokuma, V. G. Zakrzewski, G. A. Voth, P. Salvador, J. J. Dannenberg, S. Dapprich, A. D. Daniels, Ö. Farkas, J. B. Foresman, J. V. Ortiz, J. Cioslowski and D. J. Fox, Gaussian 09, Revision D01; Gaussian, Inc., Wallingford, CT, 2009.

[S15] (a) S. H. Park, J. Kwak, K. Shin, J. Ryu, Y. Park and S. Chang, *J. Am. Chem. Soc.* 2014, **136**, 2492. (b) T. M. Figg, S. Park, J. Park, S. Chang and D. G. Musaev, *Organometallics* 2014, **33**, 4076.

[S16] CYLview, 1.0b; C. Y. Legault, Université de Sherbrooke, 2009 (<http://www.cylview.org>).



# *Appendix I*

## **Spectral Copies of $^1\text{H}$ , $^{13}\text{C}$ , and $^{19}\text{F}$ NMR of Compounds Obtained in This Study**

# *N*-[(1,3-Dimethyl-2-oxindolin-3-yl)methyl]-4-methoxybenzamide (Table 2, 3a)

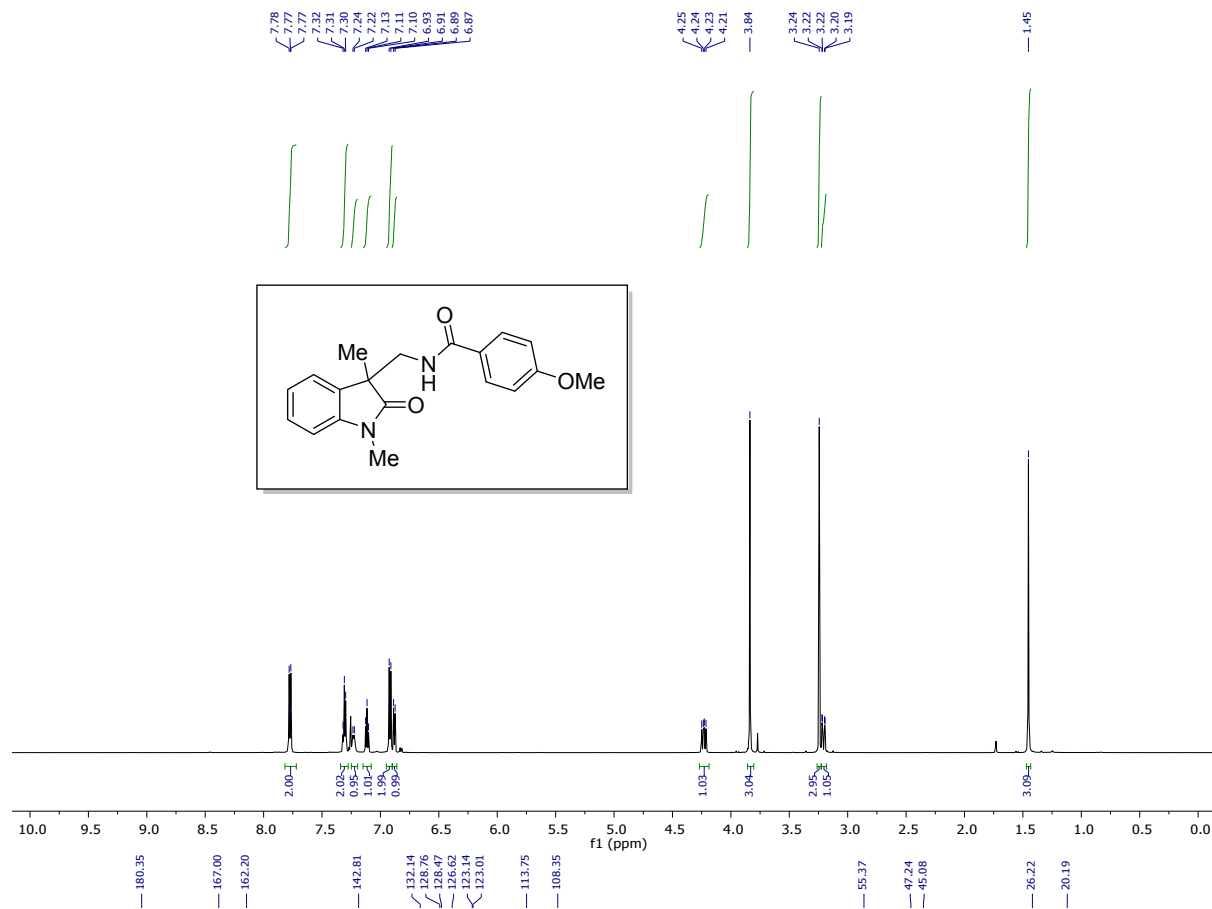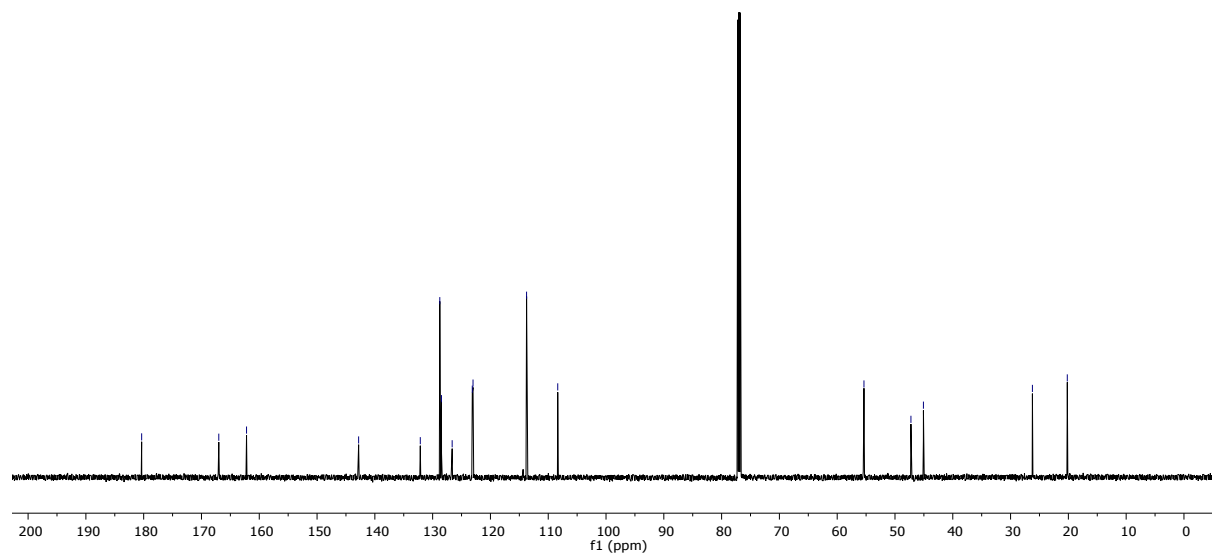

4-(*tert*-Butyl)-*N*-[(1,3-dimethyl-2-oxindolin-3-yl)methyl]benzamide (Table 2, 3b)

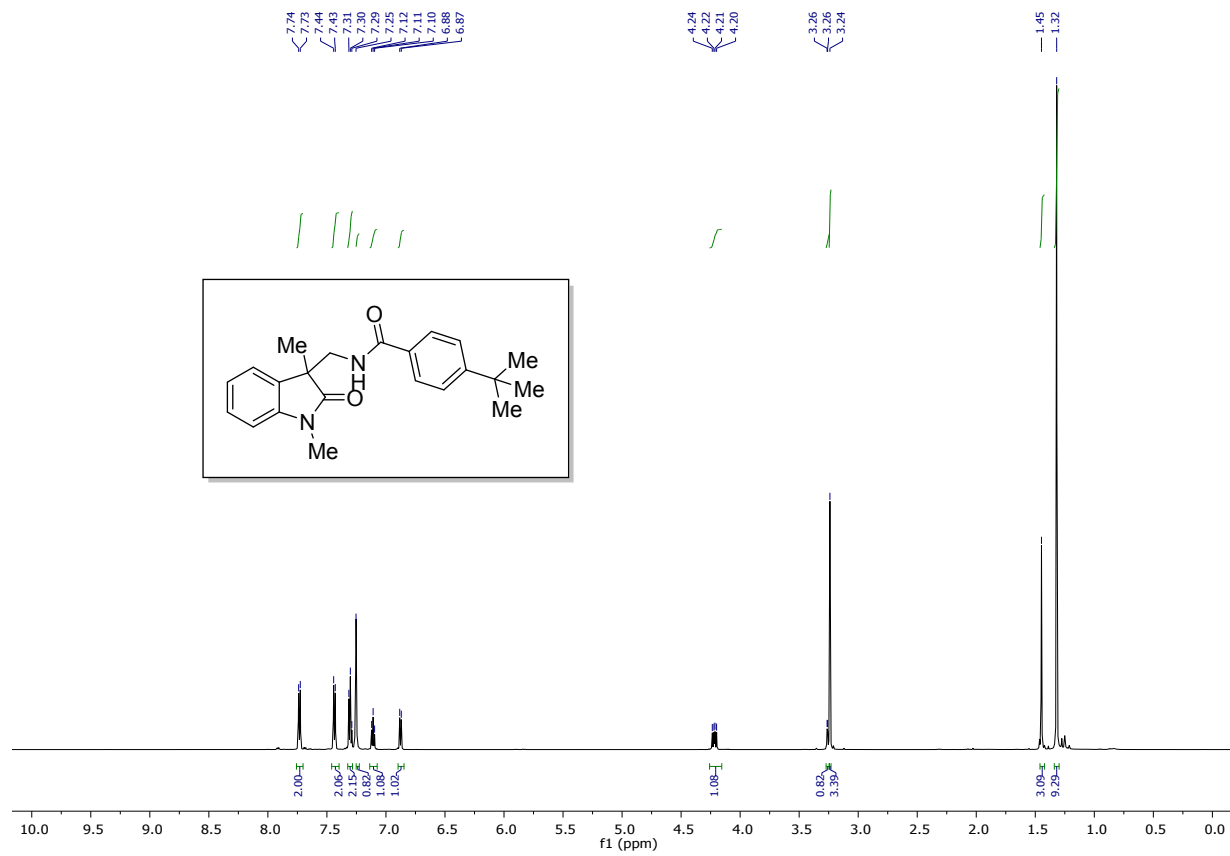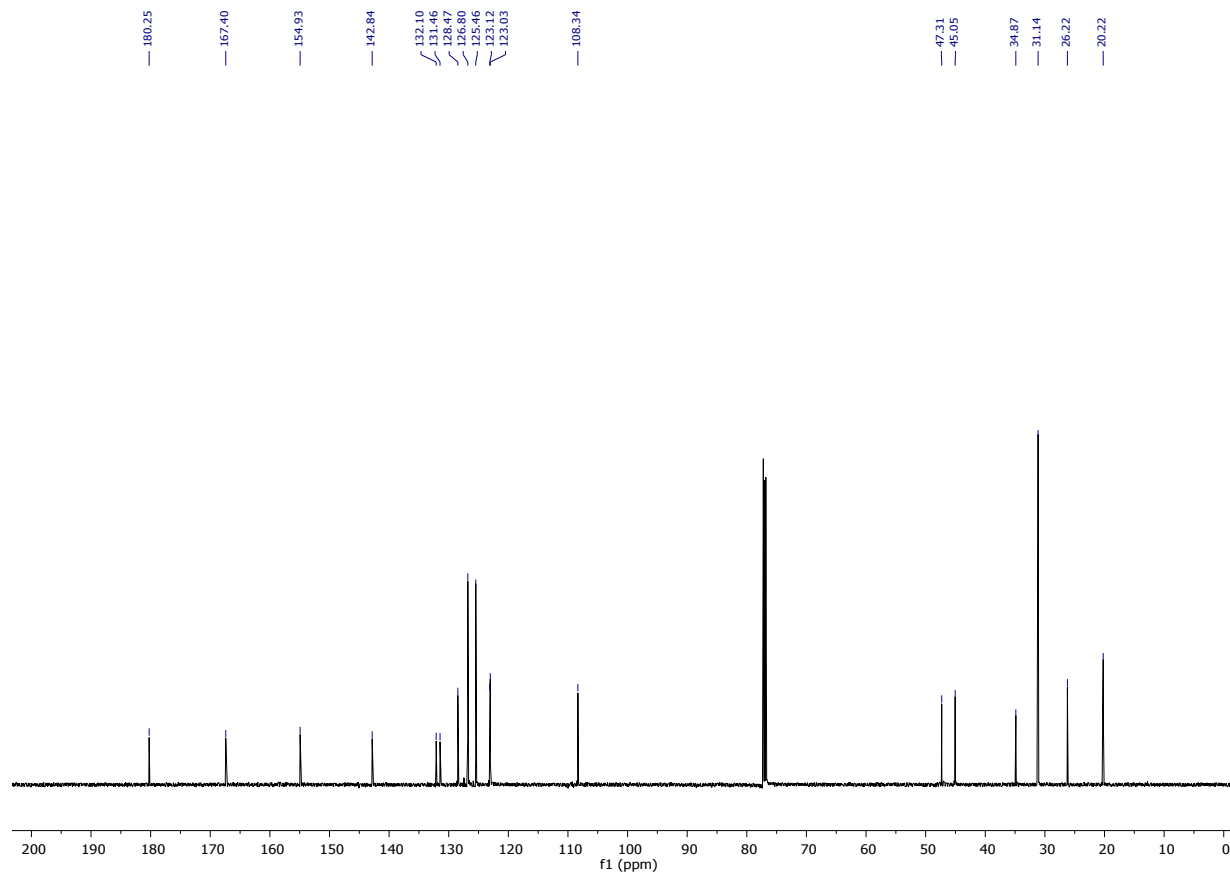

***N*-[(1,3-Dimethyl-2-oxindolin-3-yl)methyl]benzamide (Table 2, 3c)**

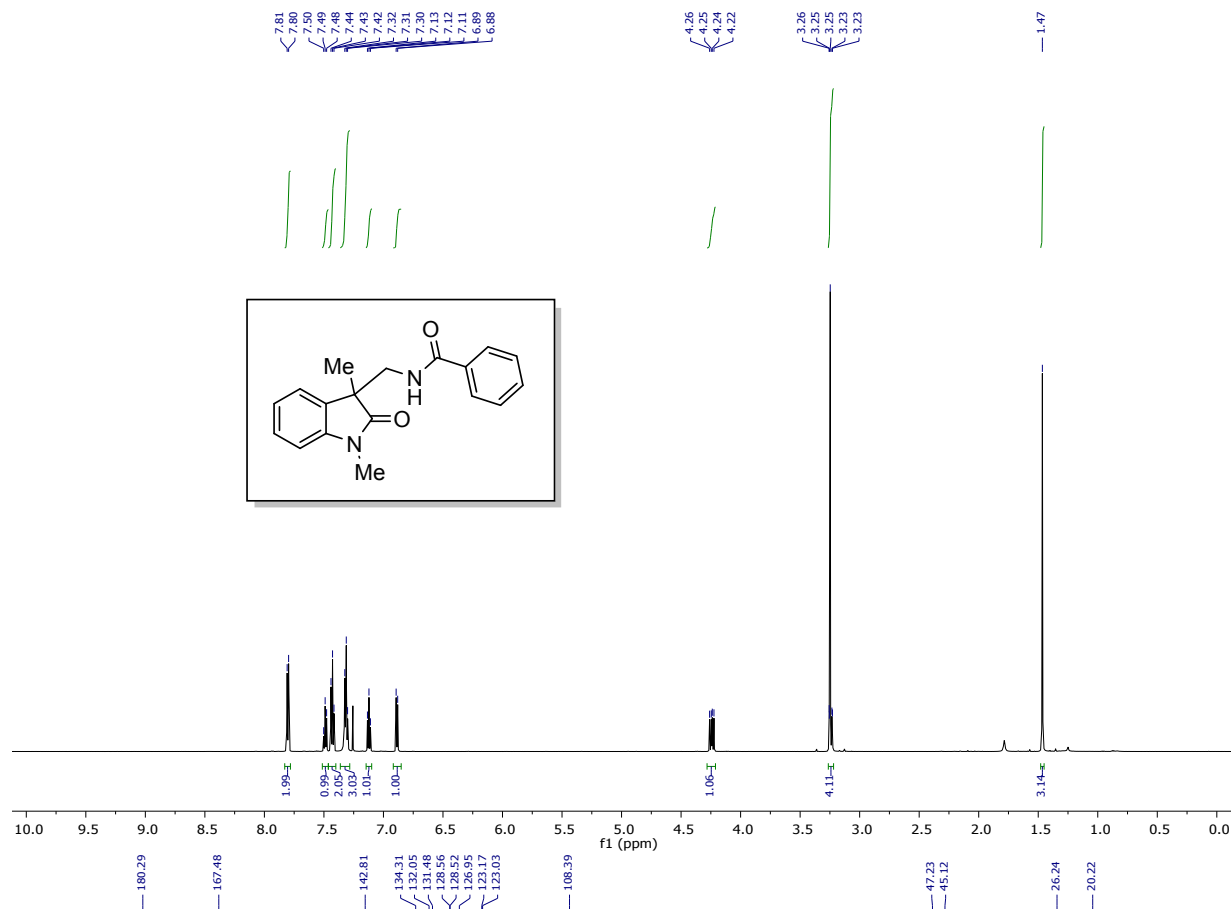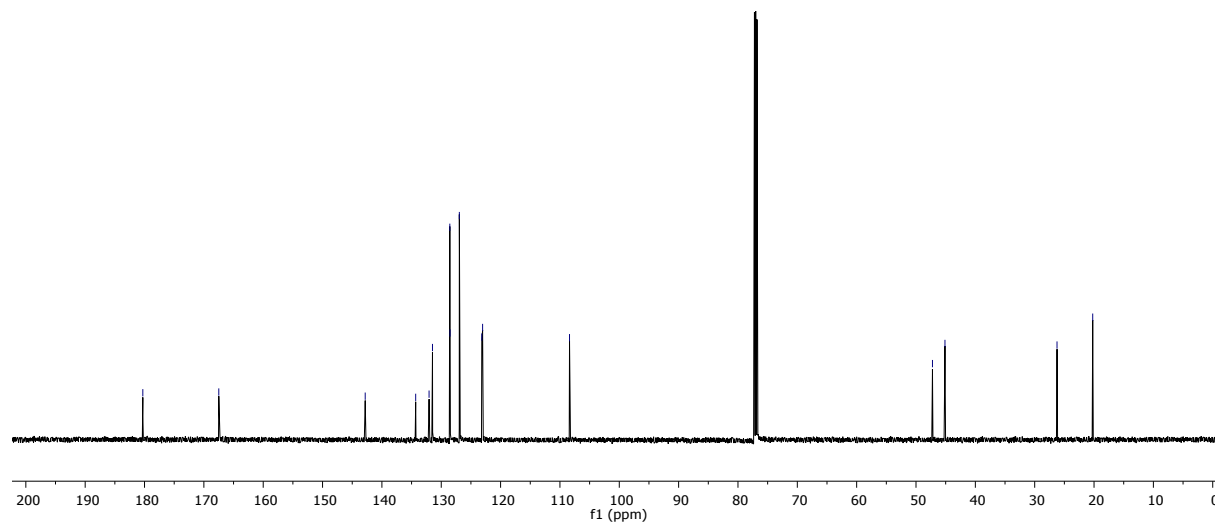

4-Chloro-*N*-[(1,3-dimethyl-2-oxindolin-3-yl)methyl]benzamide (Table 2, 3d)

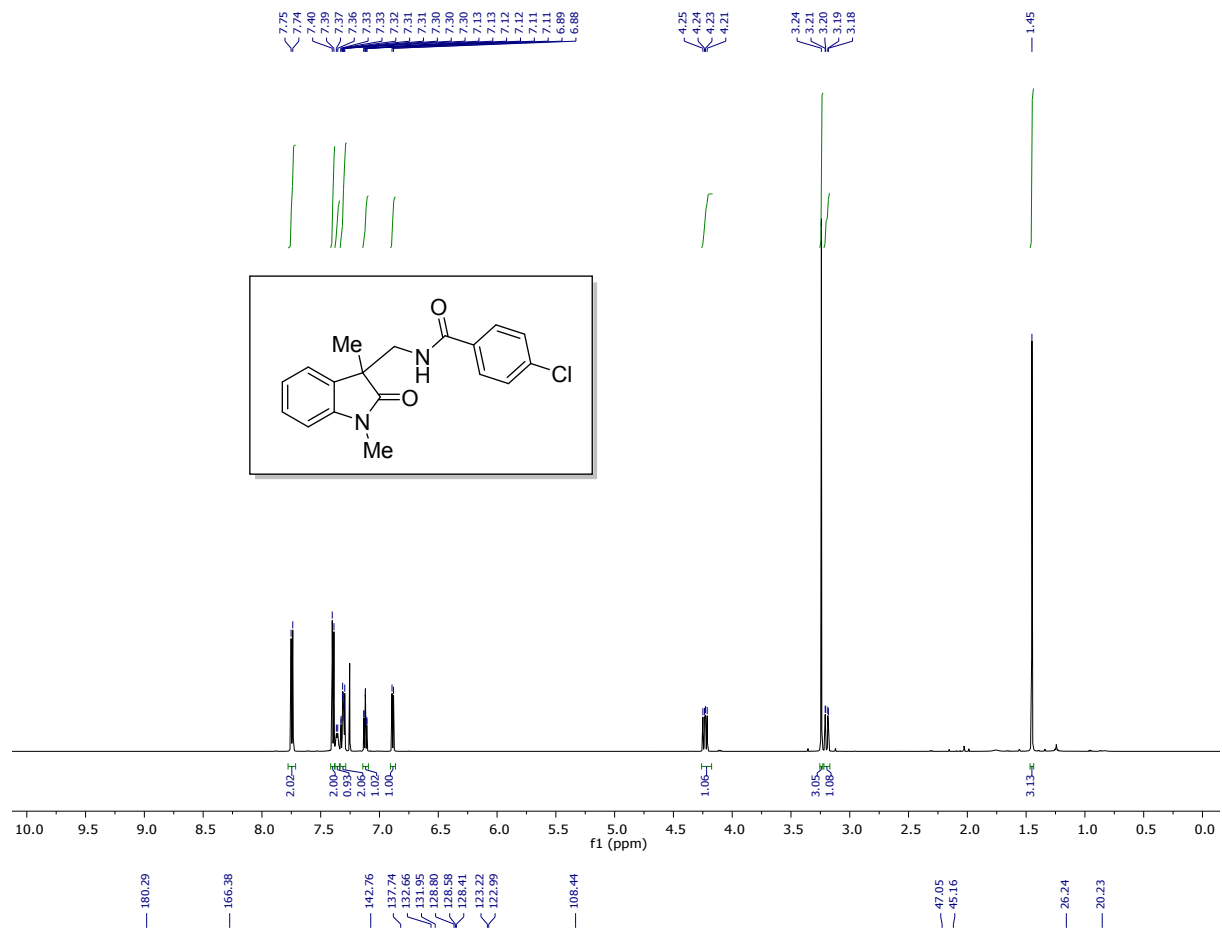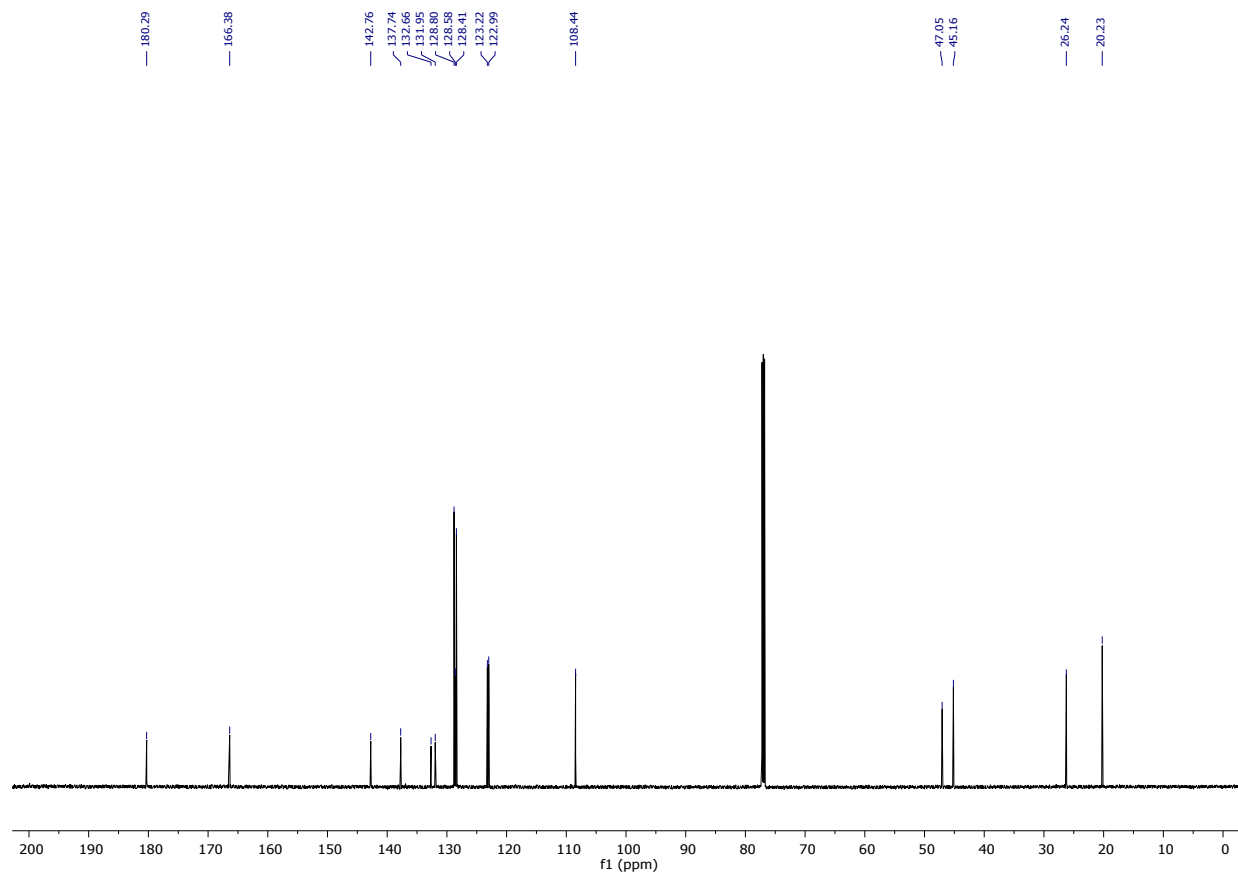

# 4-Bromo-N-[(1,3-dimethyl-2-oxindolin-3-yl)methyl]benzamide (Table 2, 3e)

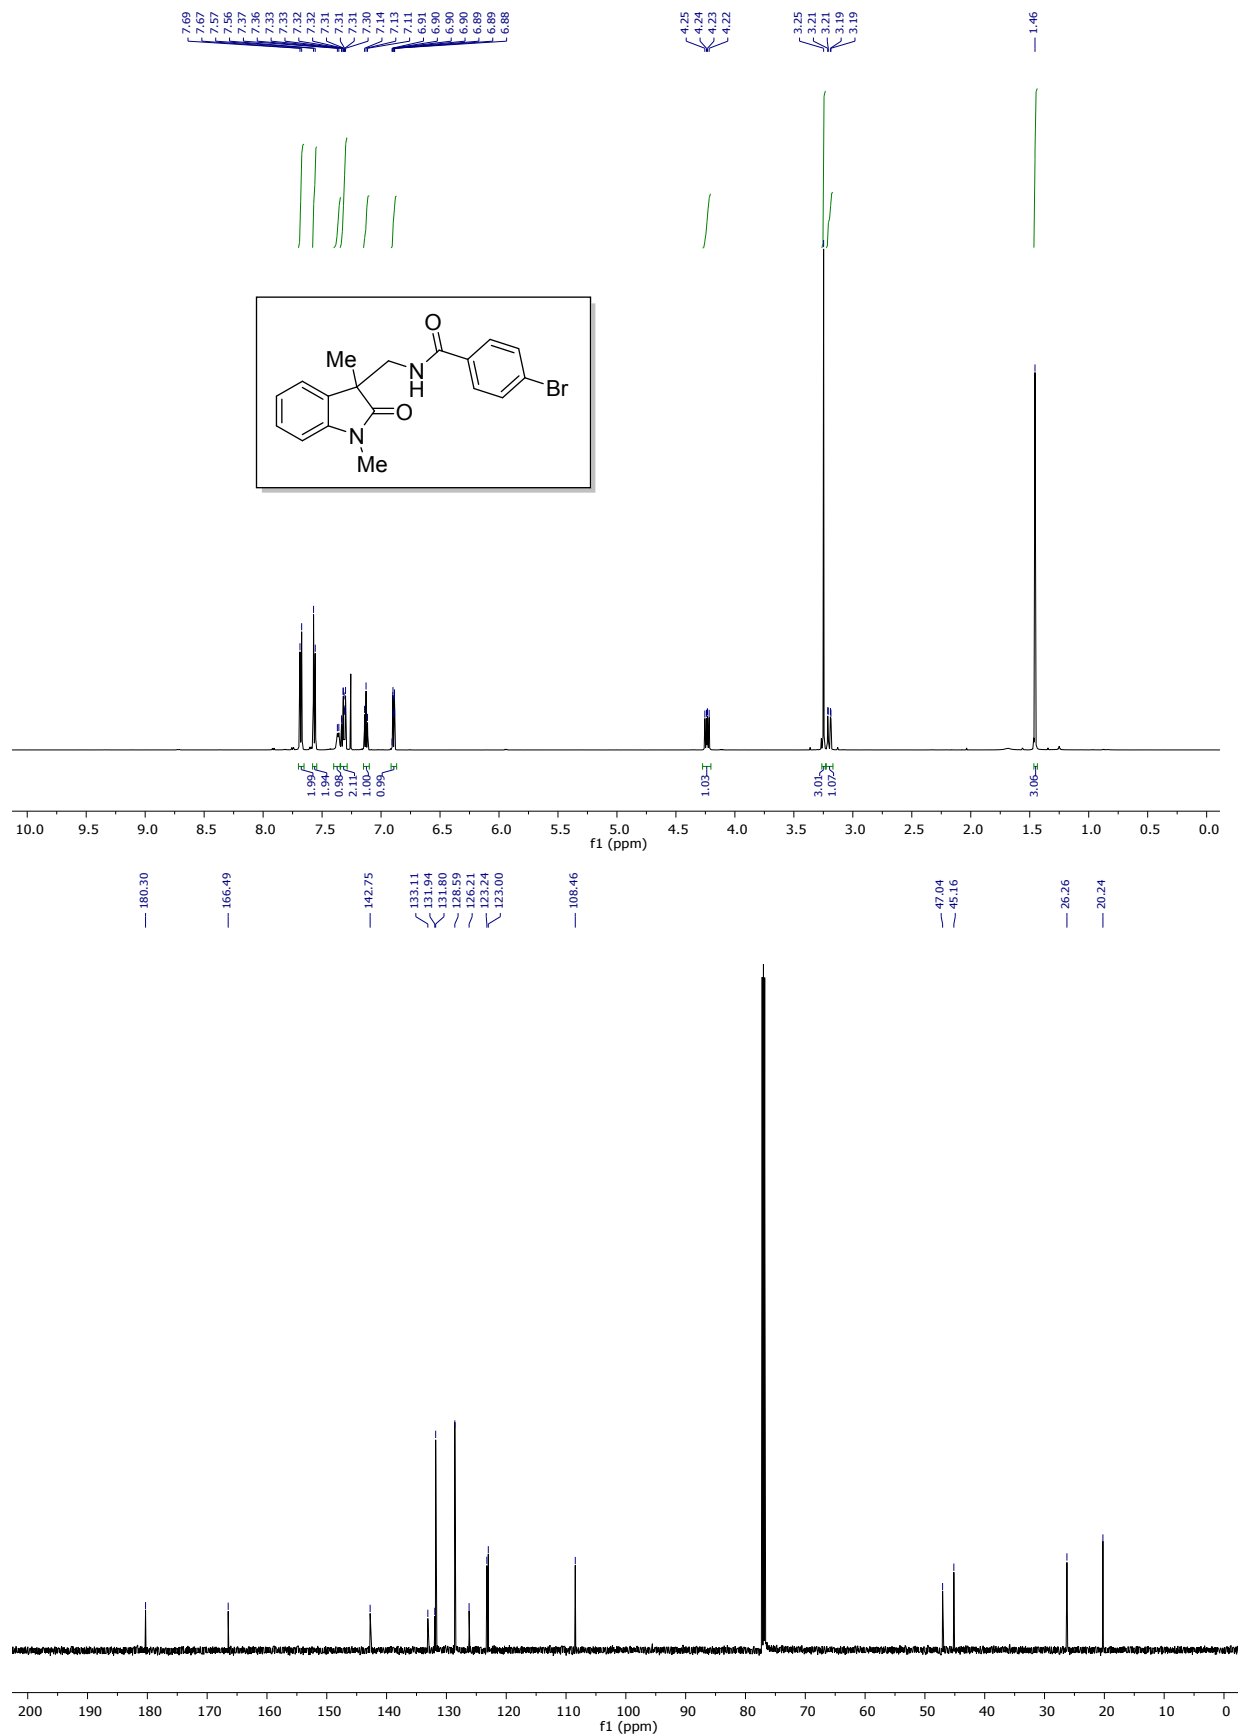

Methyl-4-[[[(1,3-dimethyl-2-oxindolin-3-yl)methyl]carbamoyl]benzoate (Table 2, 3f)

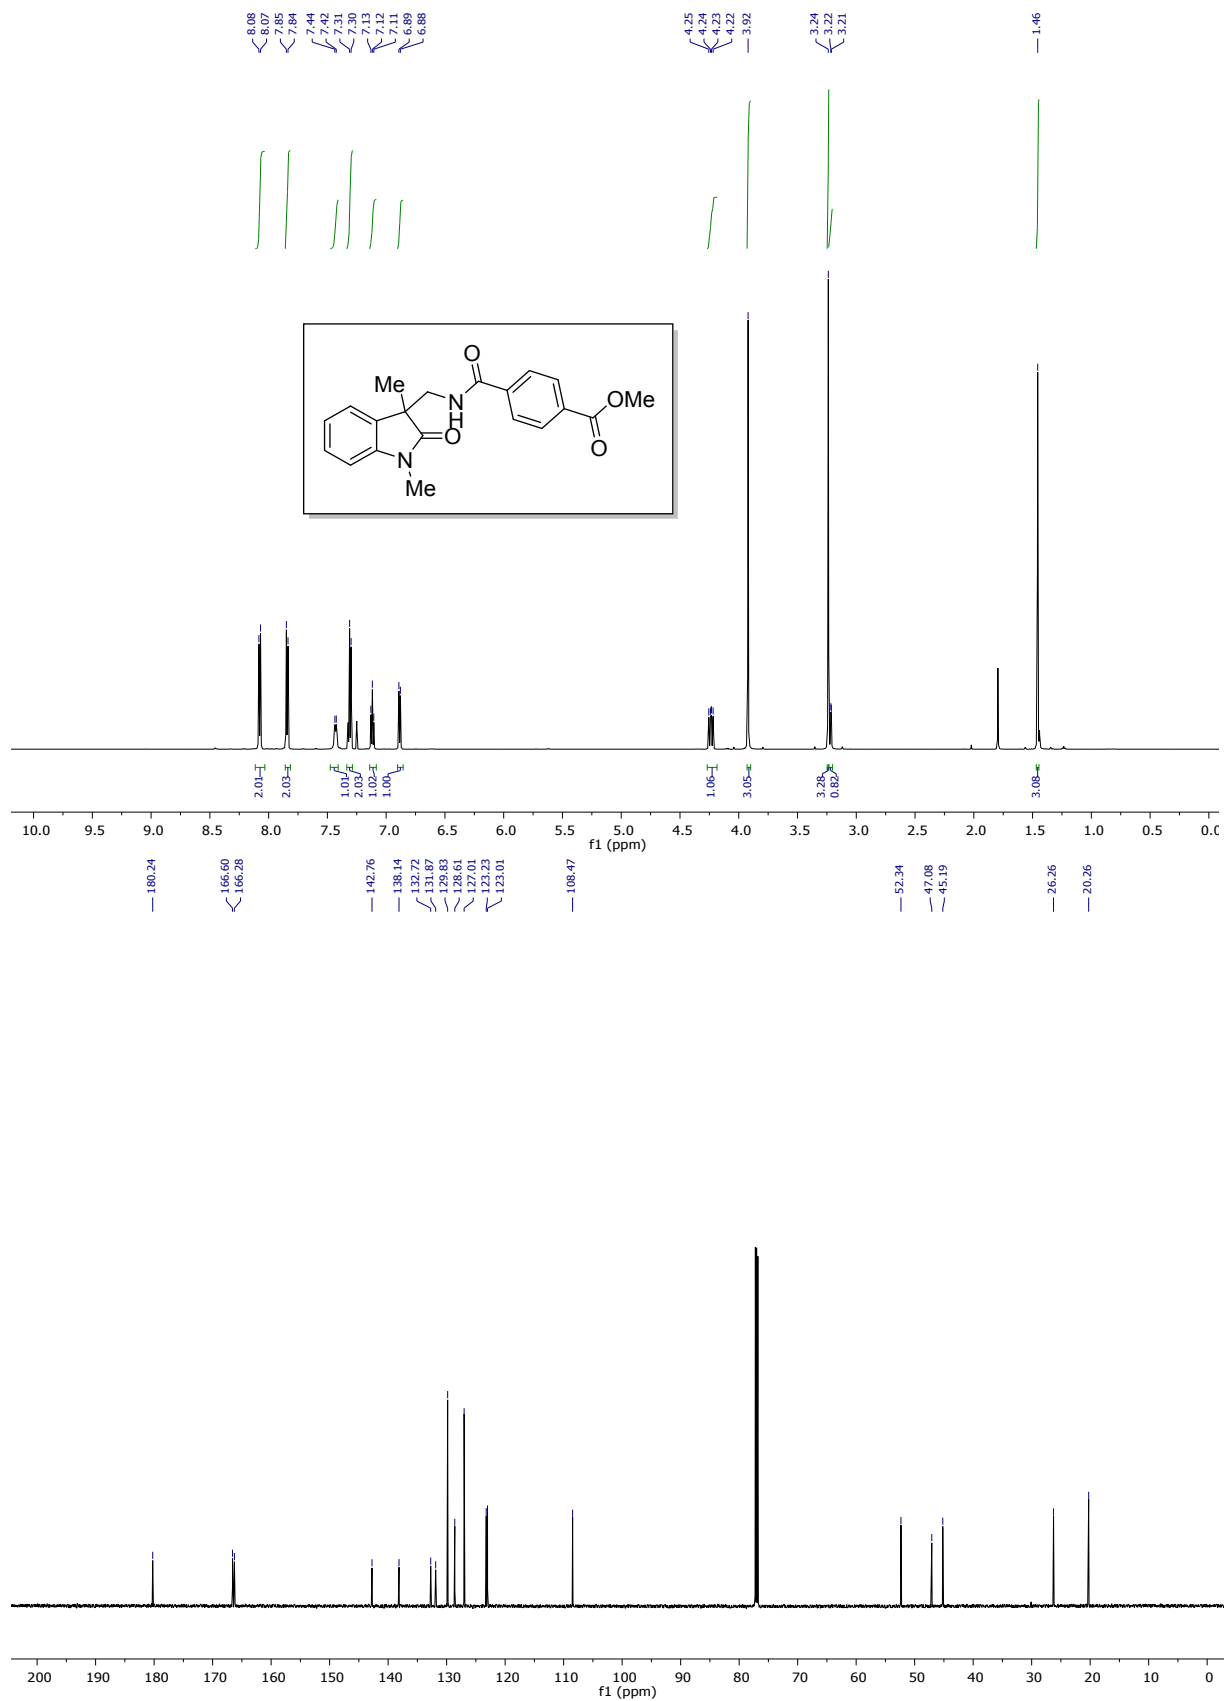

***N*-[(1,3-Dimethyl-2-oxindolin-3-yl)methyl]-4-(trifluoromethyl)benzamide (Table 2, 3g)**

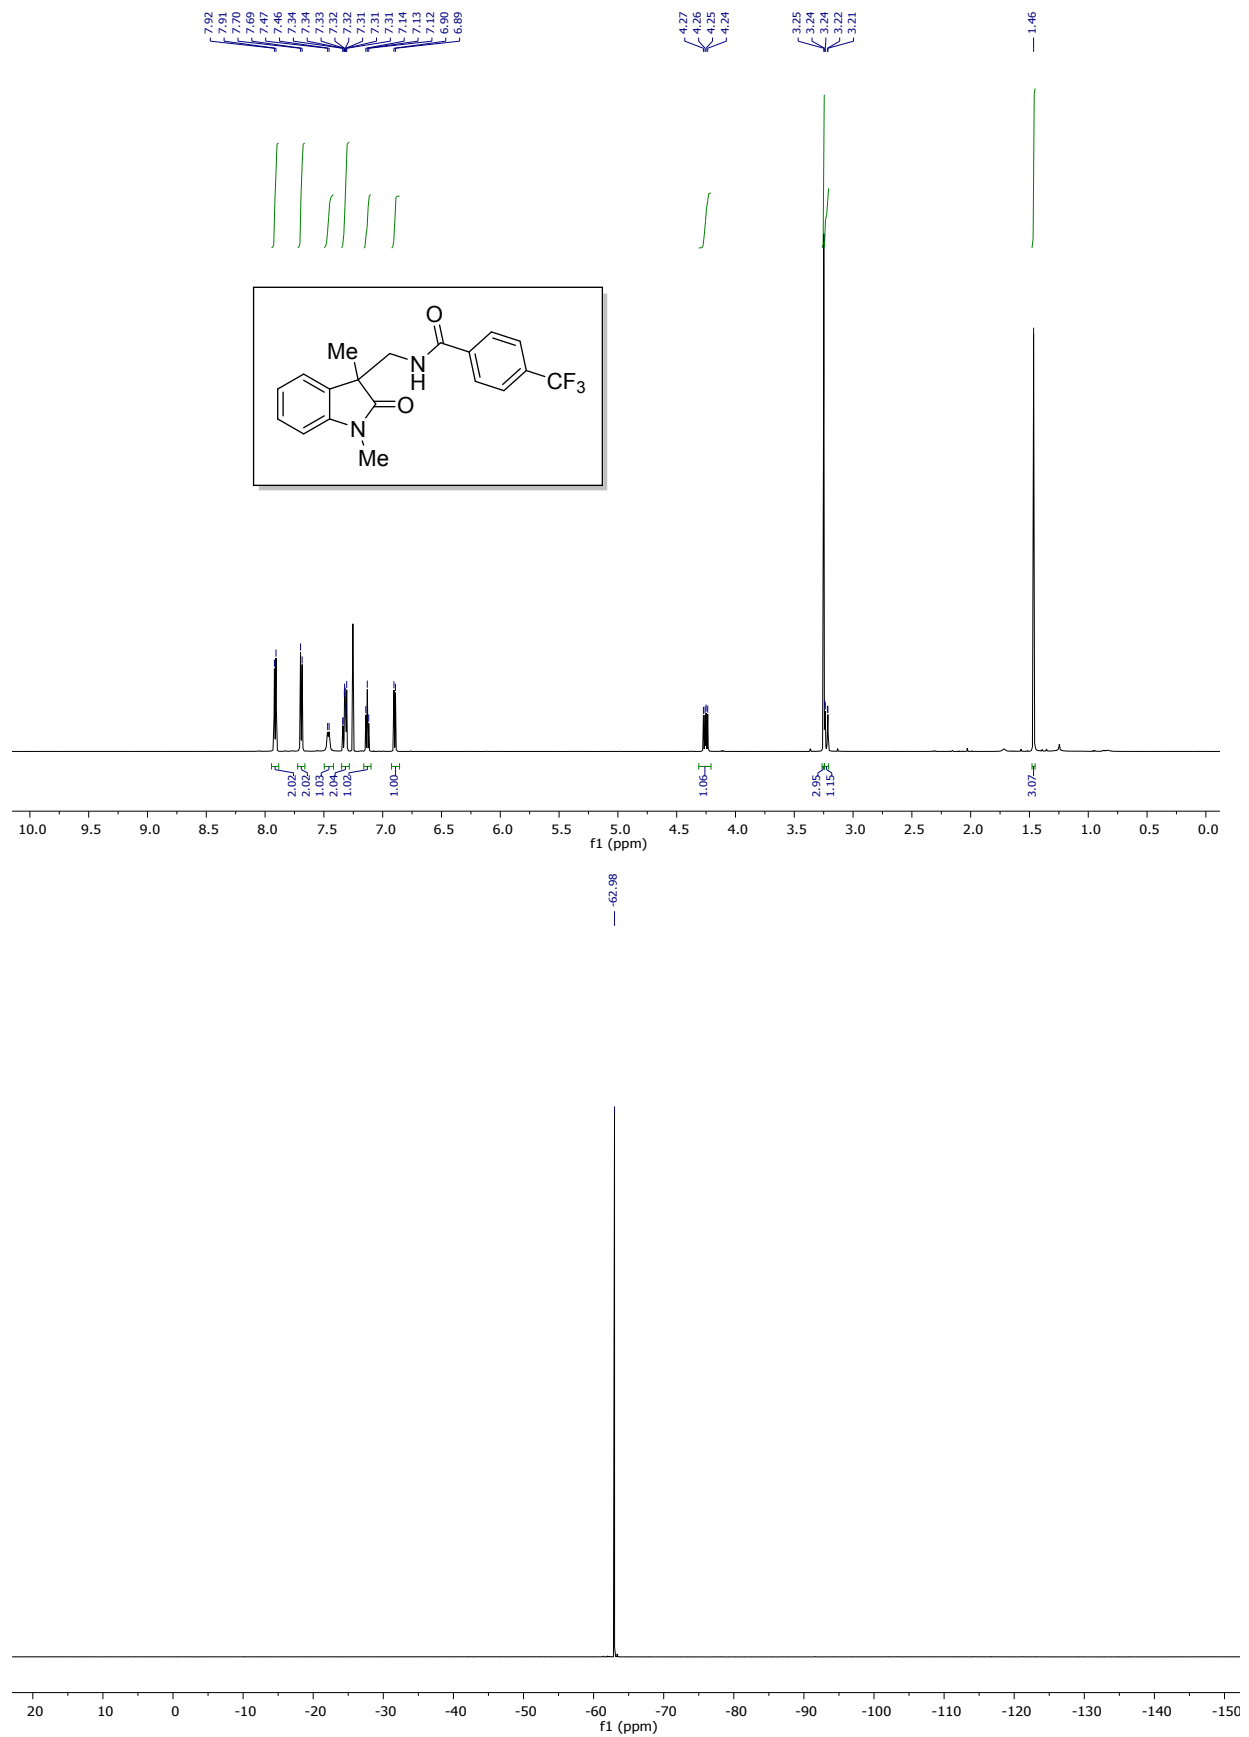



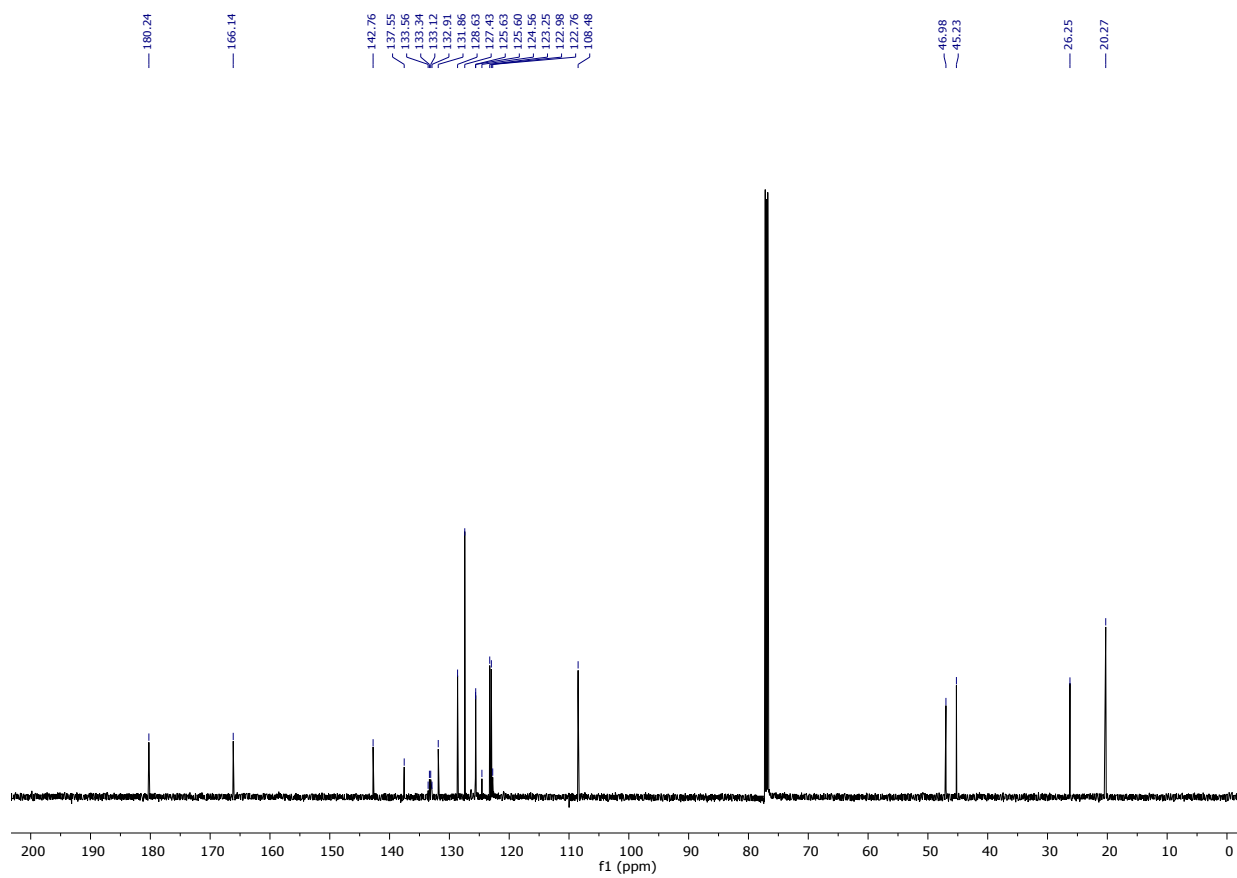

4-Cyano-N-[(1,3-dimethyl-2-oxindolin-3-yl)methyl]benzamide (Table 2, 3h)

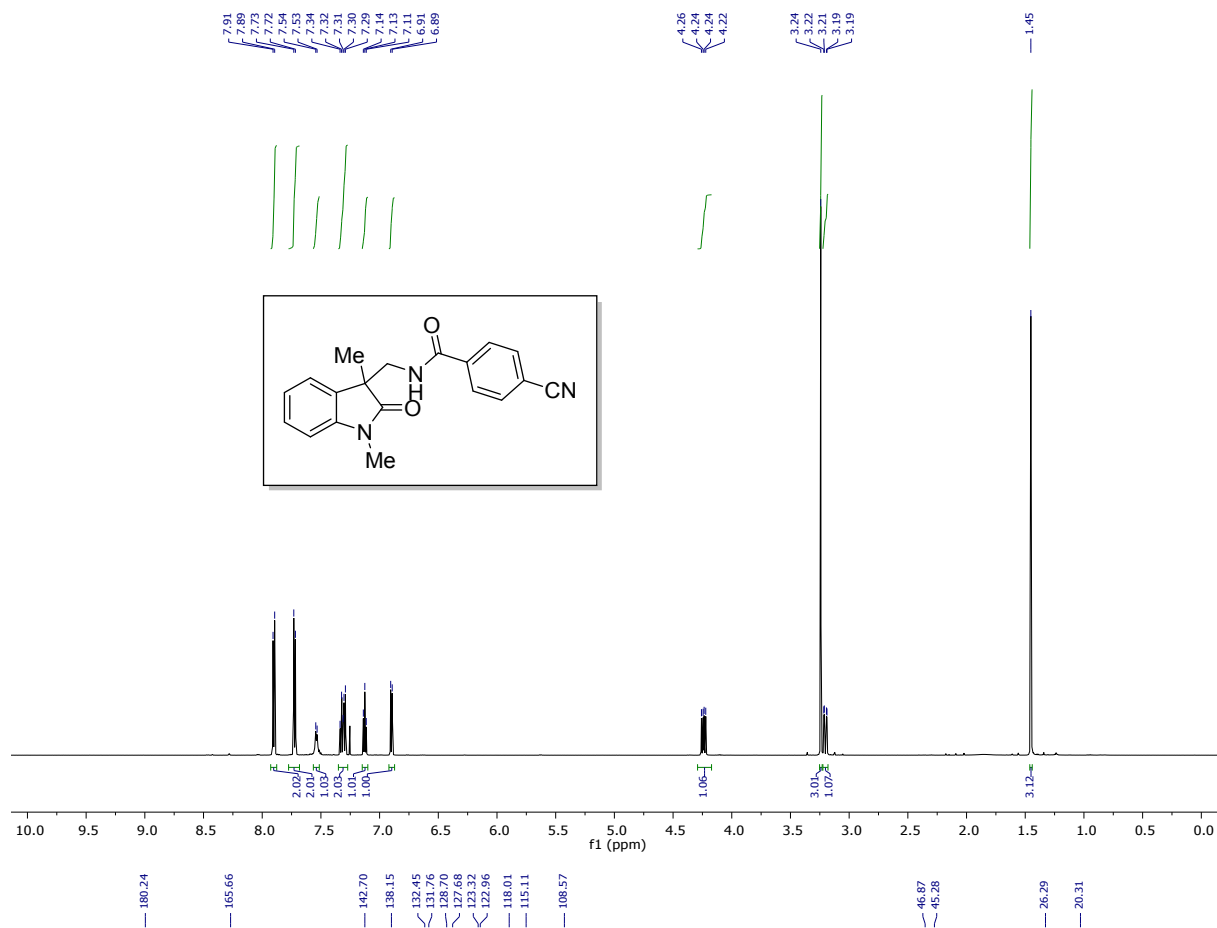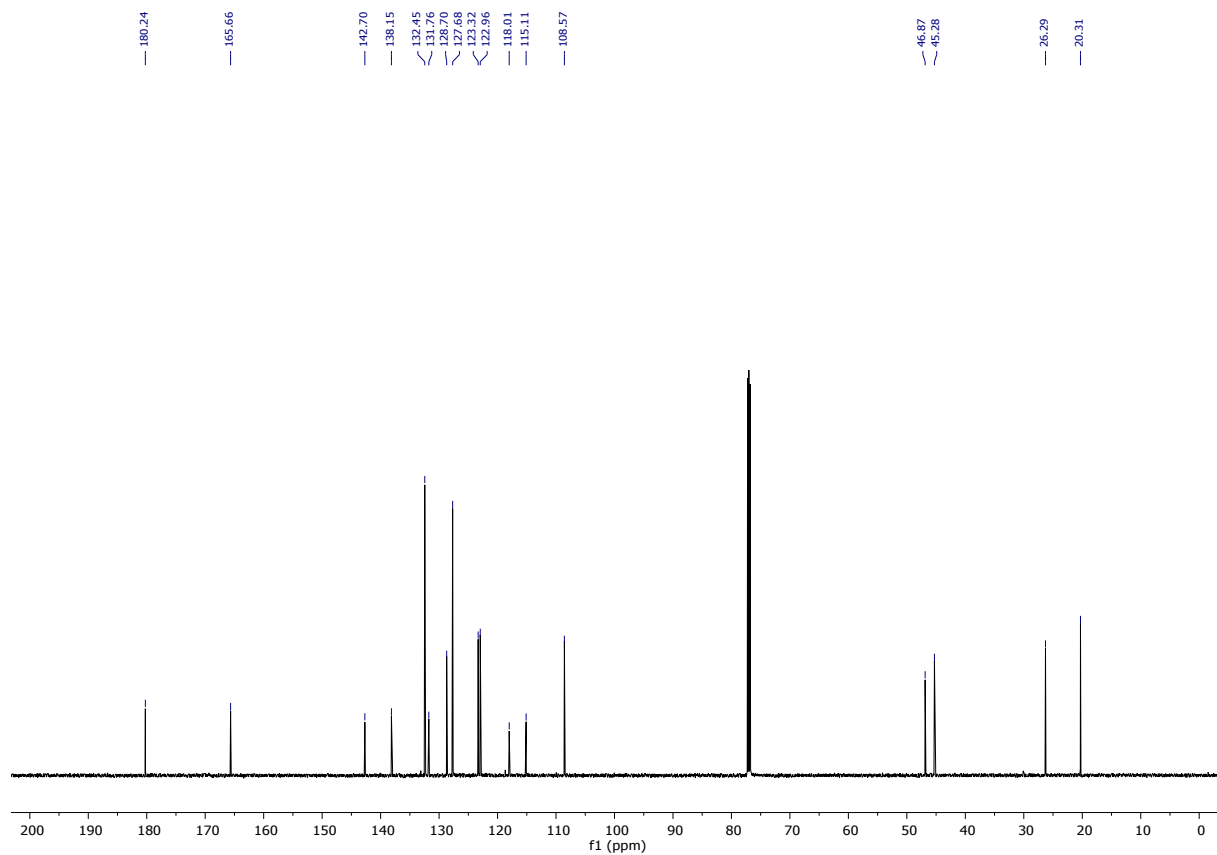

***N*-[(1,3-Dimethyl-2-oxindolin-3-yl)methyl]-3,5-dimethylbenzamide (Table 2, 3i)**

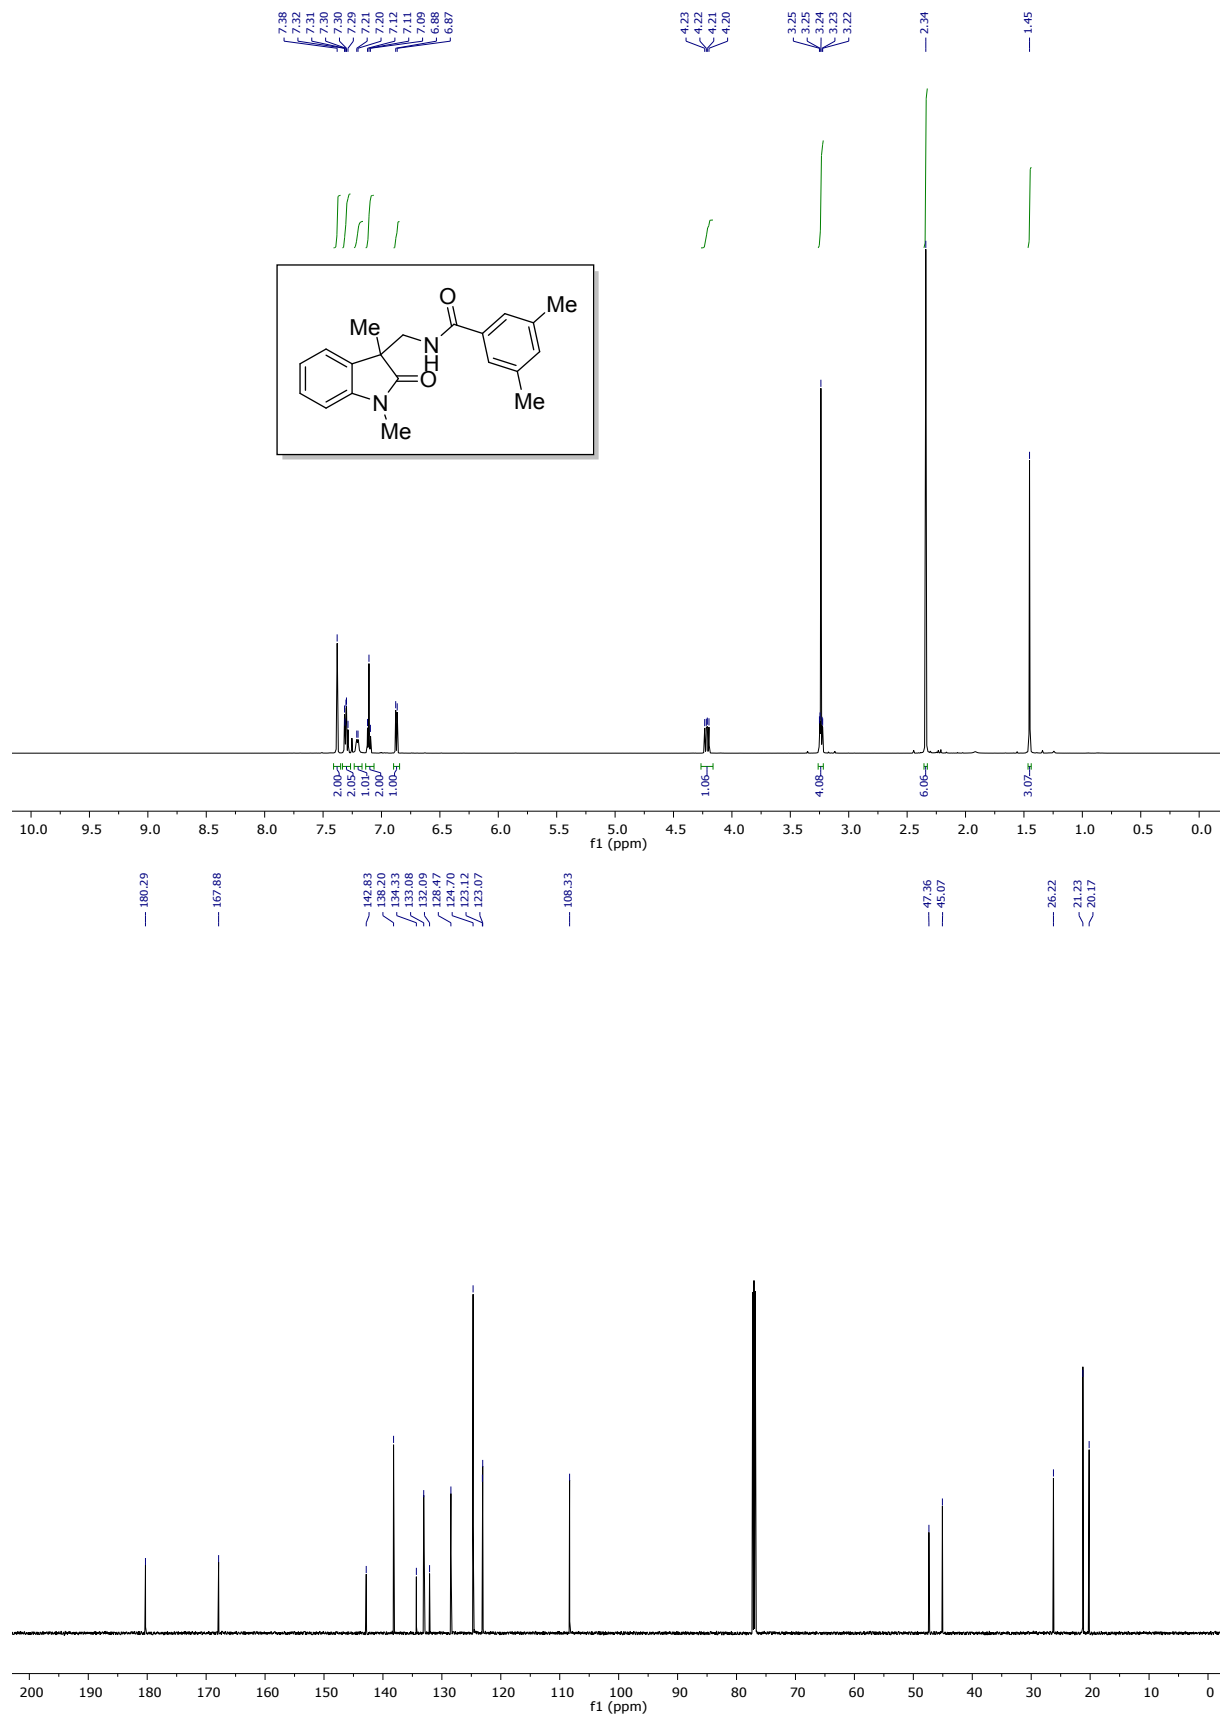

### 3,5-Dichloro-N-[(1,3-dimethyl-2-oxindolin-3-yl)methyl]benzamide (Table 2, 3j)

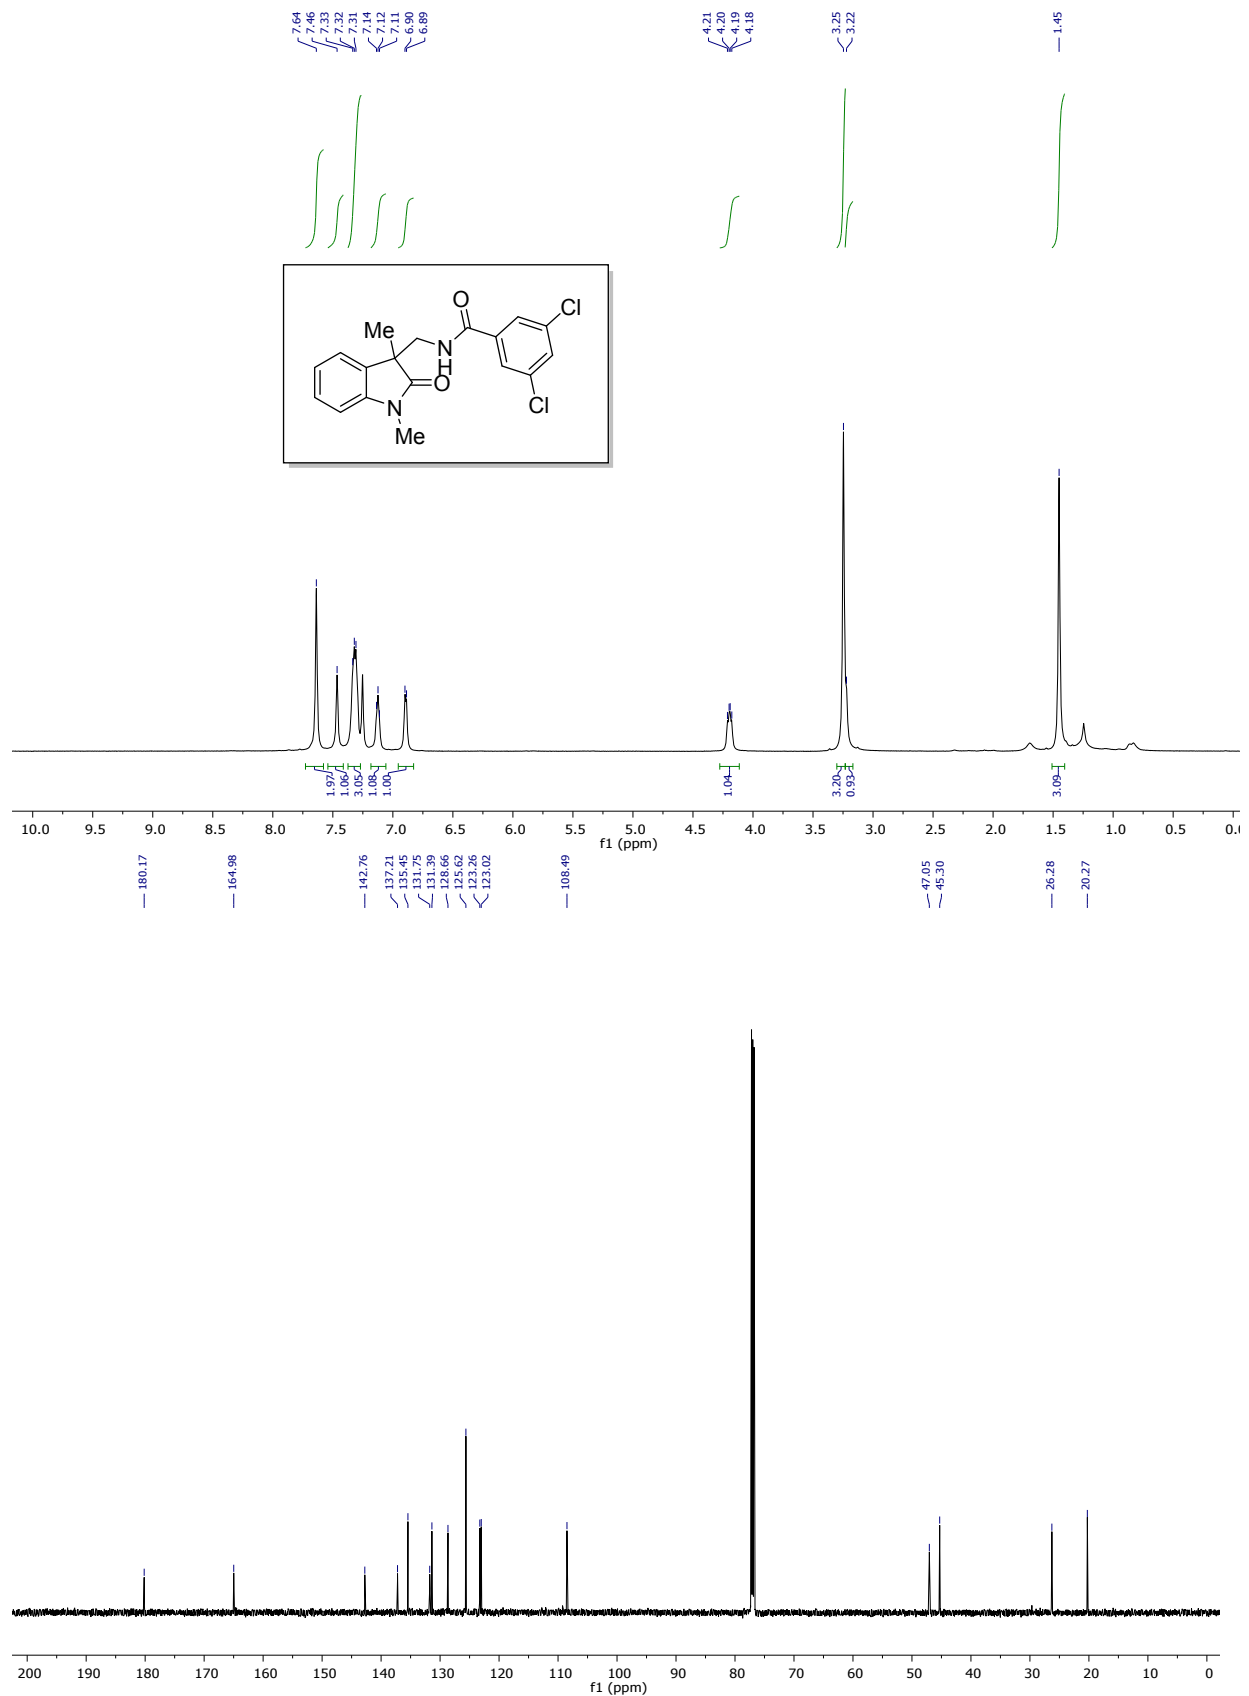

***N*-[(1-Ethyl-3-methyl-2-oxindolin-3-yl)methyl]-4-methoxybenzamide (Table 2, 3k)**

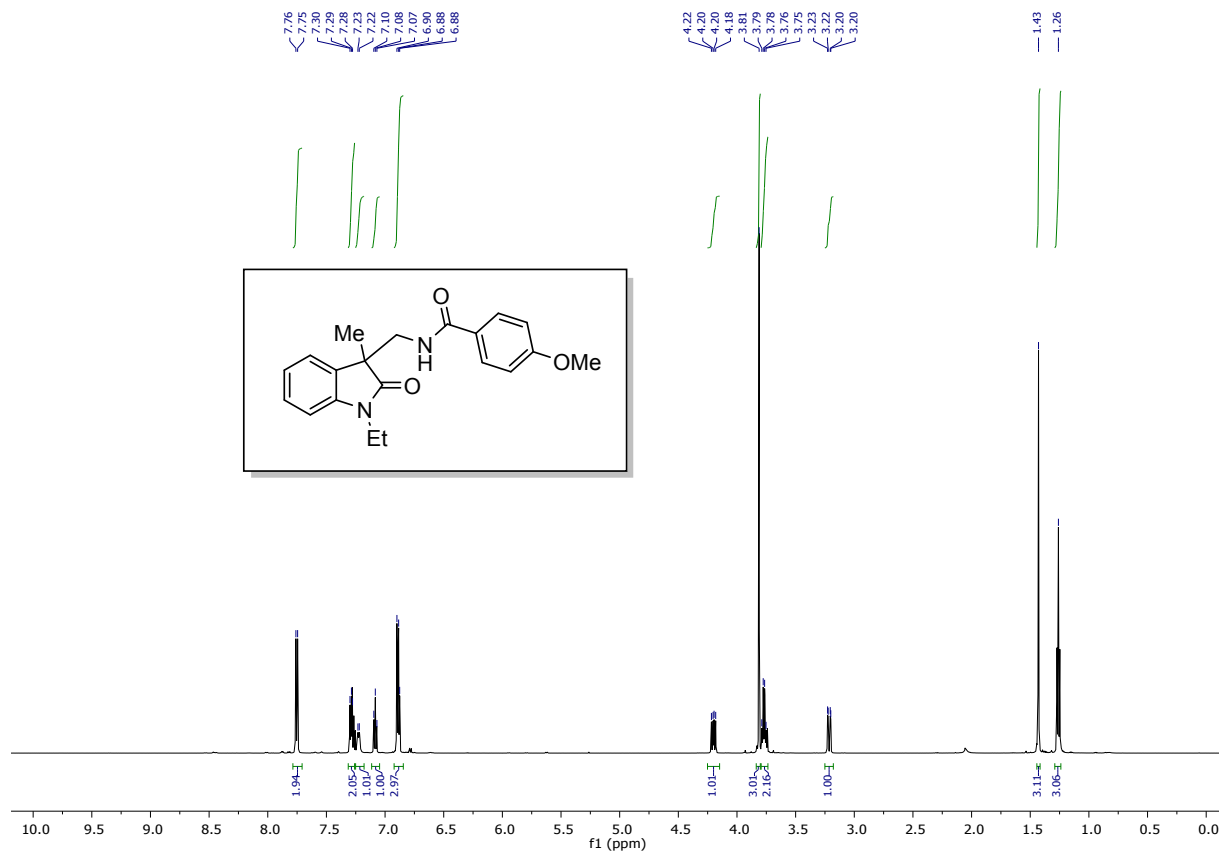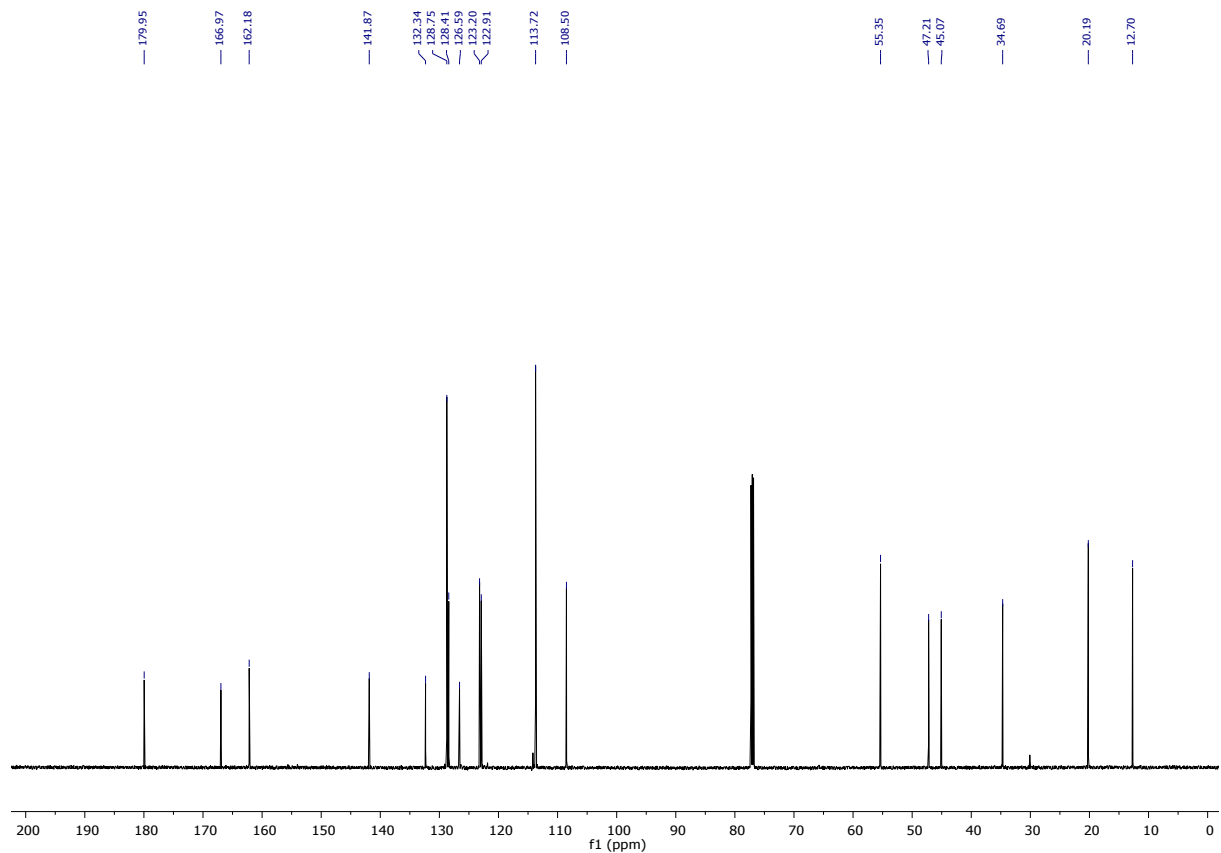

***N*-[(1-Benzyl-3-methyl-2-oxindolin-3-yl)methyl]-4-methoxybenzamide (Table 2, 3I)**

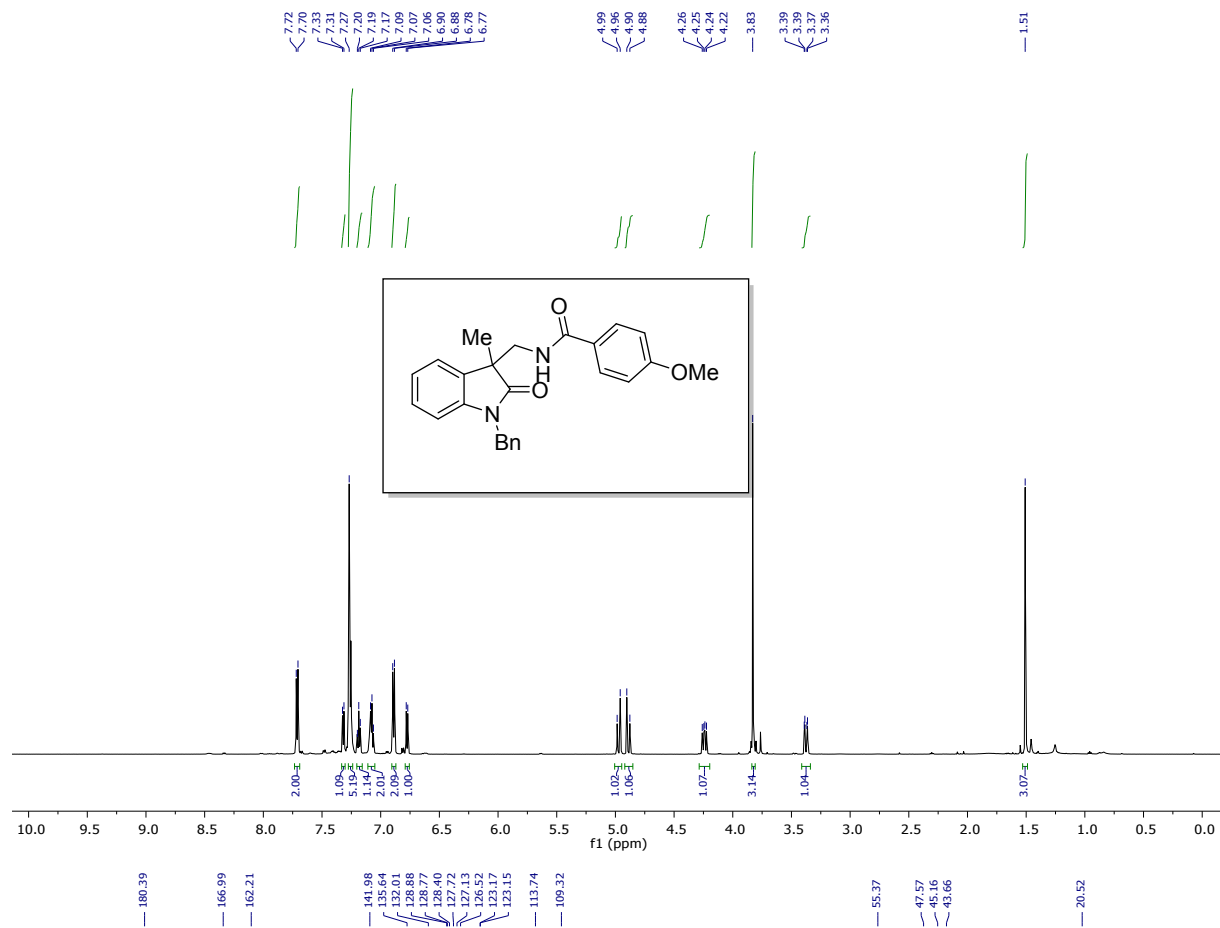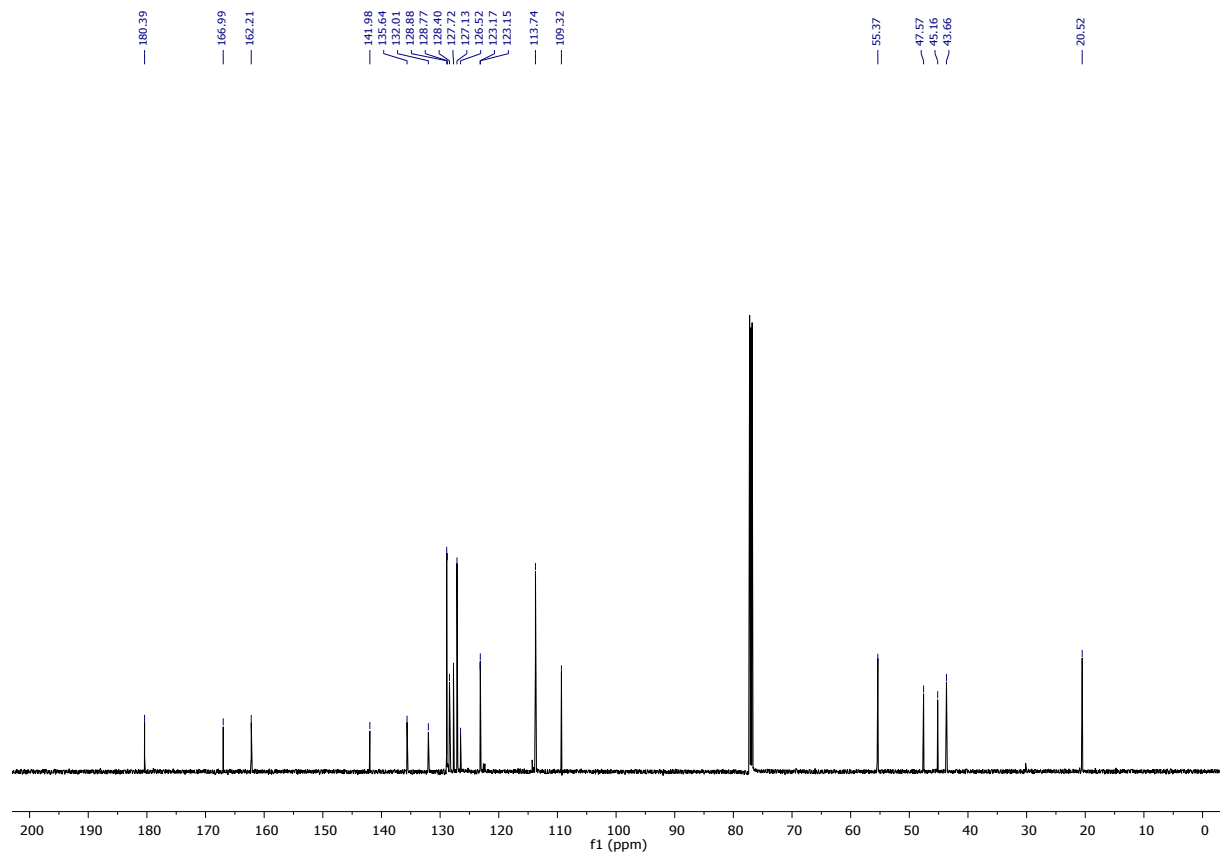

# 4-Methoxy-N-[(3-methyl-2-oxo-1-phenylindolin-3-yl)methyl]benzamide (Table 2, 3m)

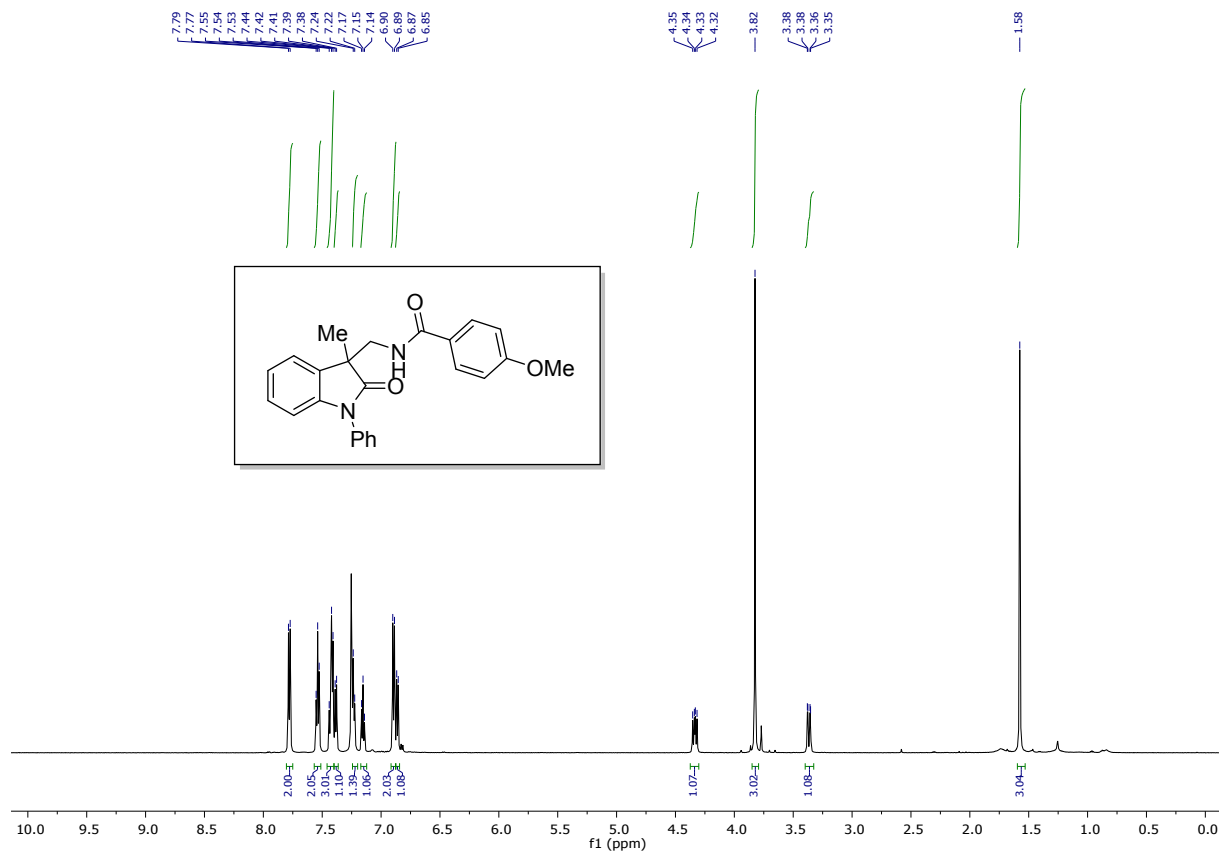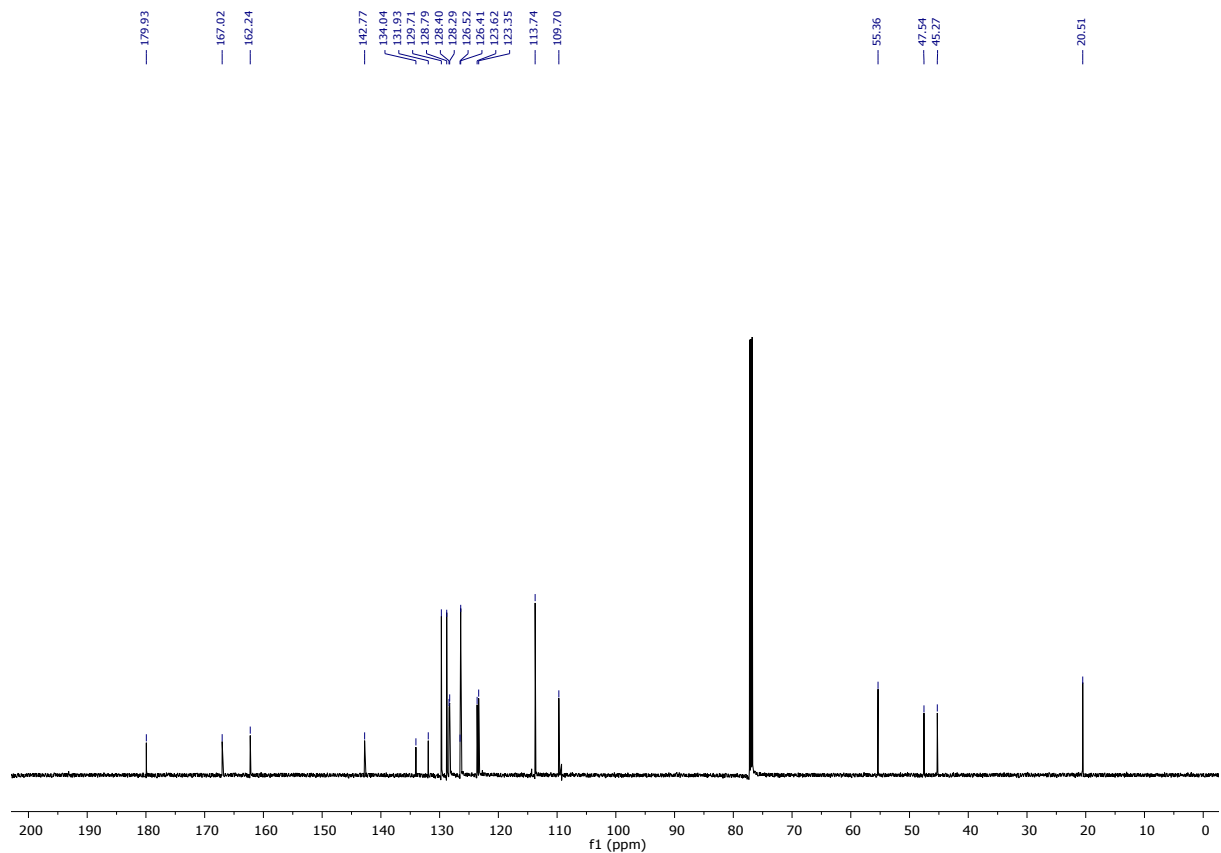

# 4-Methoxy-N-[(5-methoxy-1,3-dimethyl-2-oxindolin-3-yl)methyl]benzamide (Table 2, 3n)

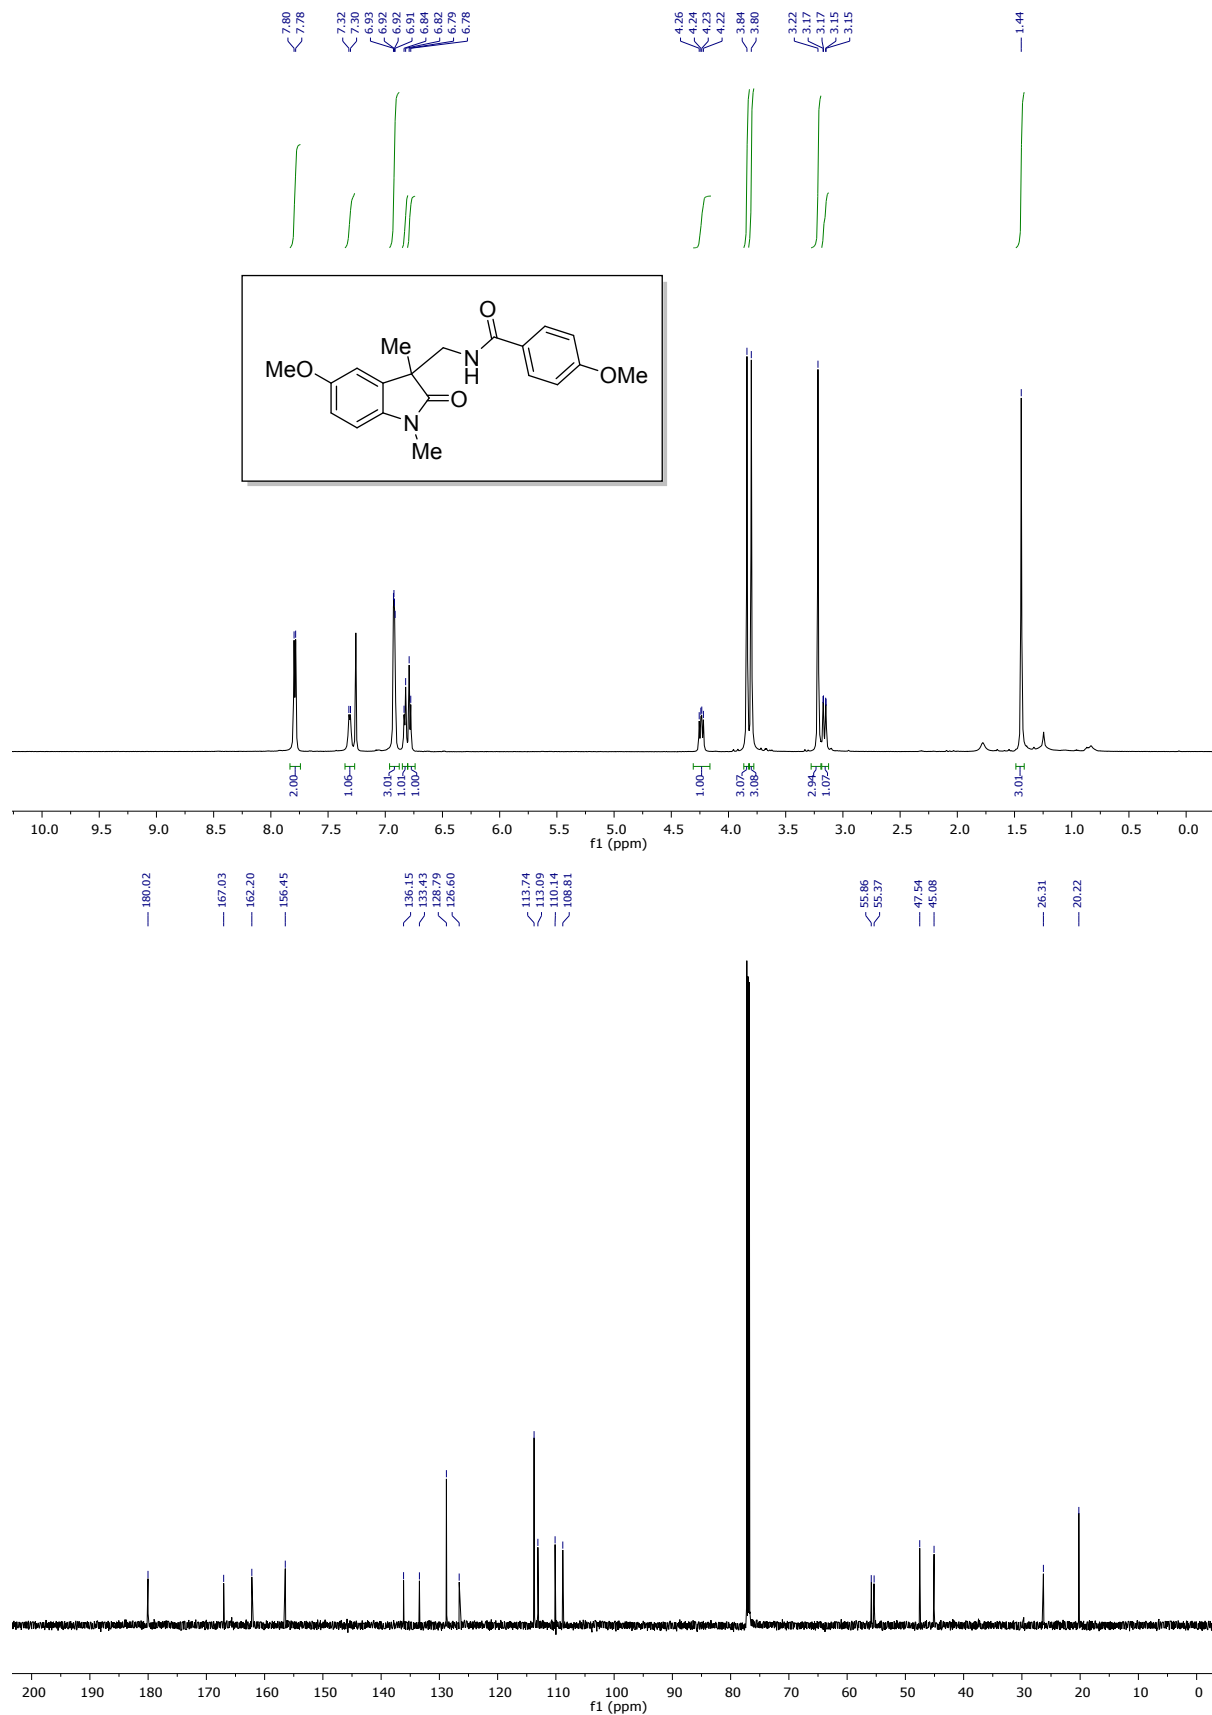



# 4-Methoxy-N-[(1,3,5-trimethyl-2-oxindolin-3-yl)methyl]benzamide (Table 2, 3o)

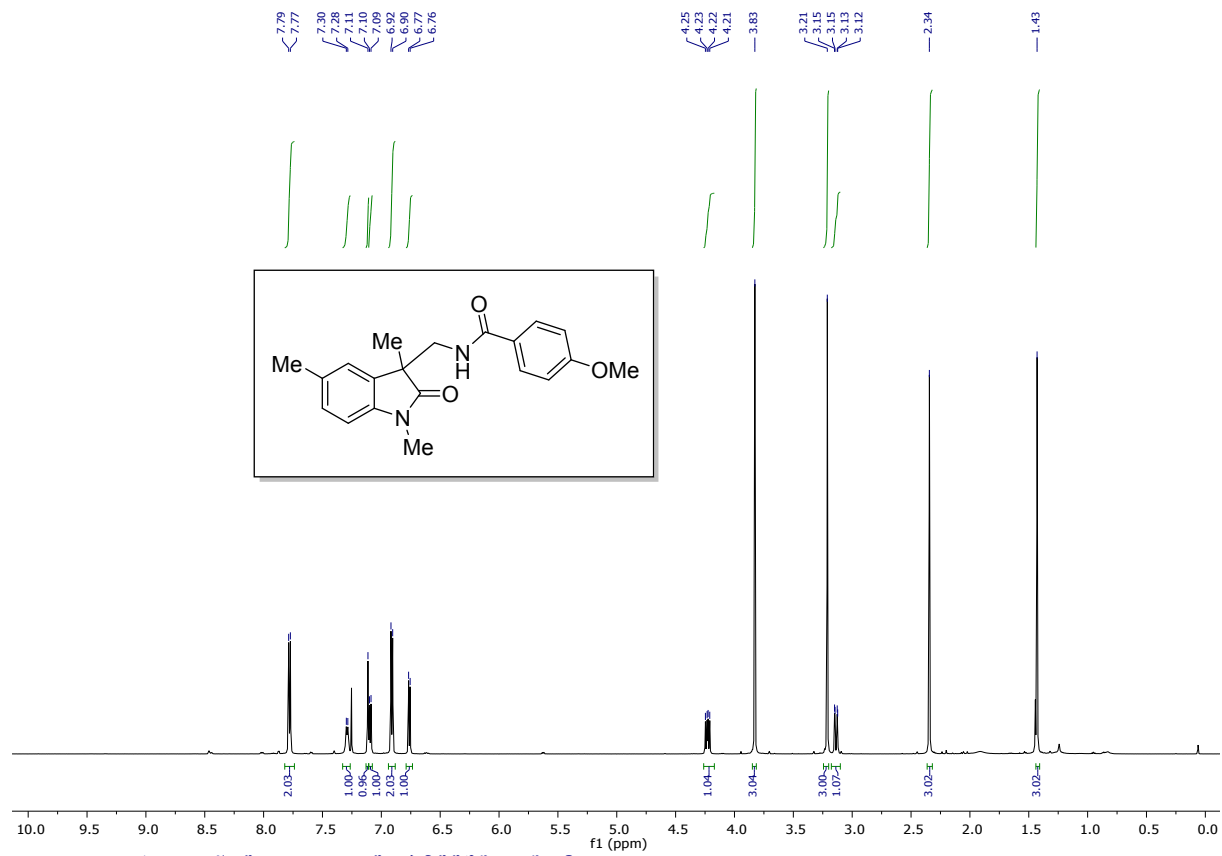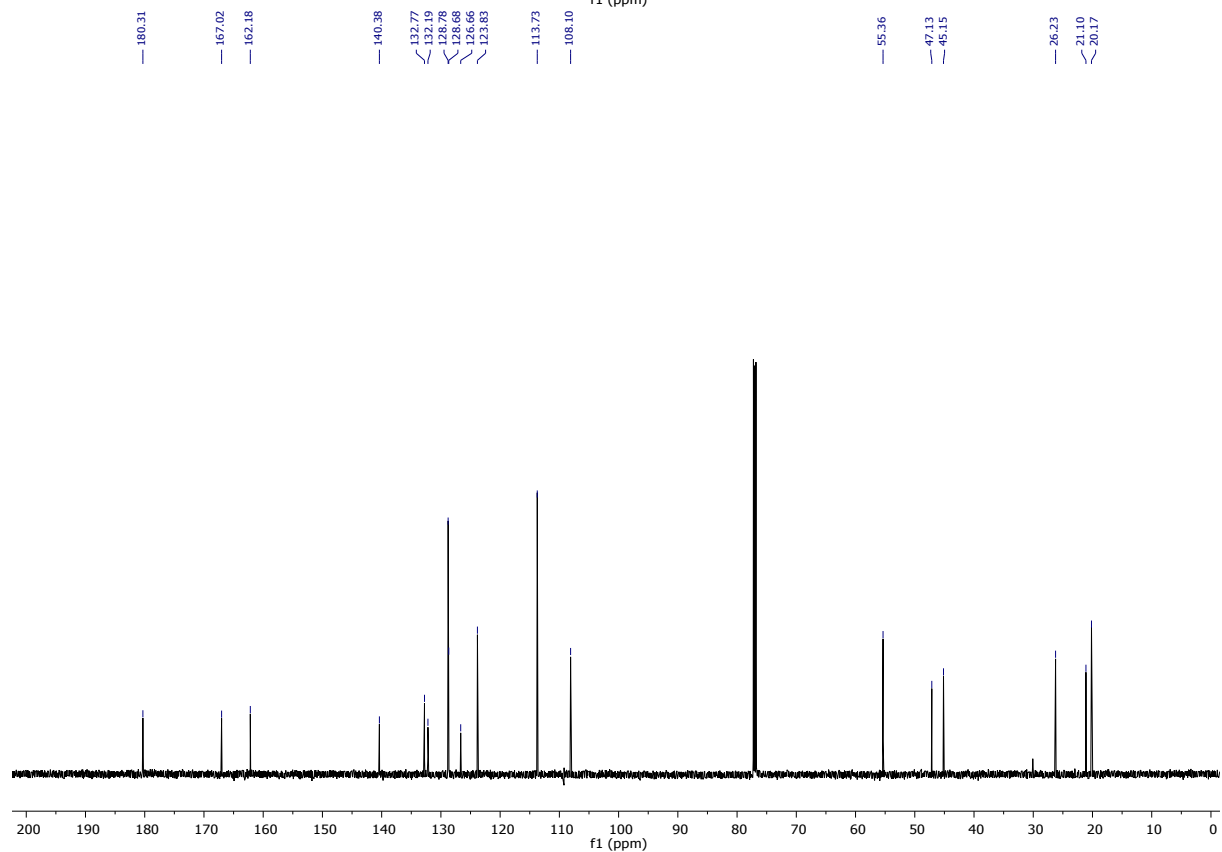

# *N*-[(5-Chloro-1,3-dimethyl-2-oxindolin-3-yl)methyl]-4-methoxybenzamide (Table 2, 3p)

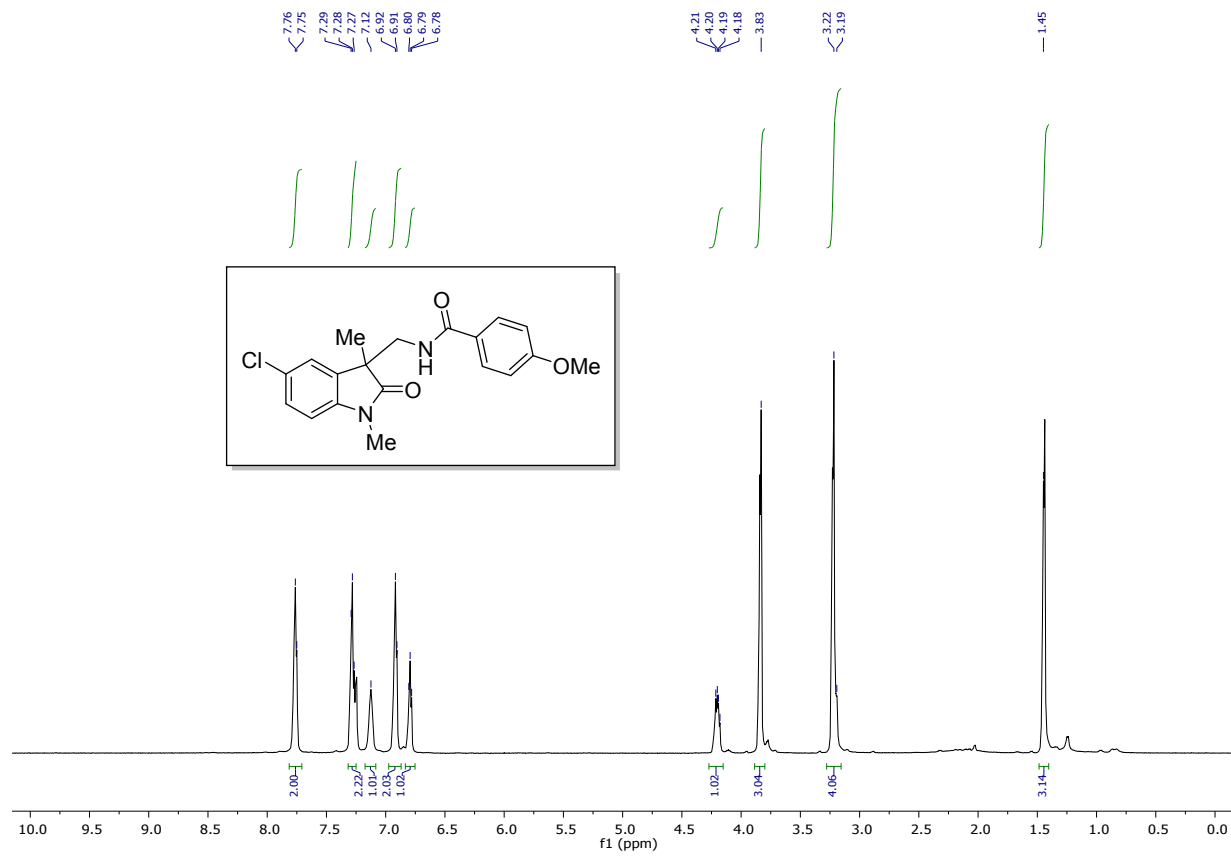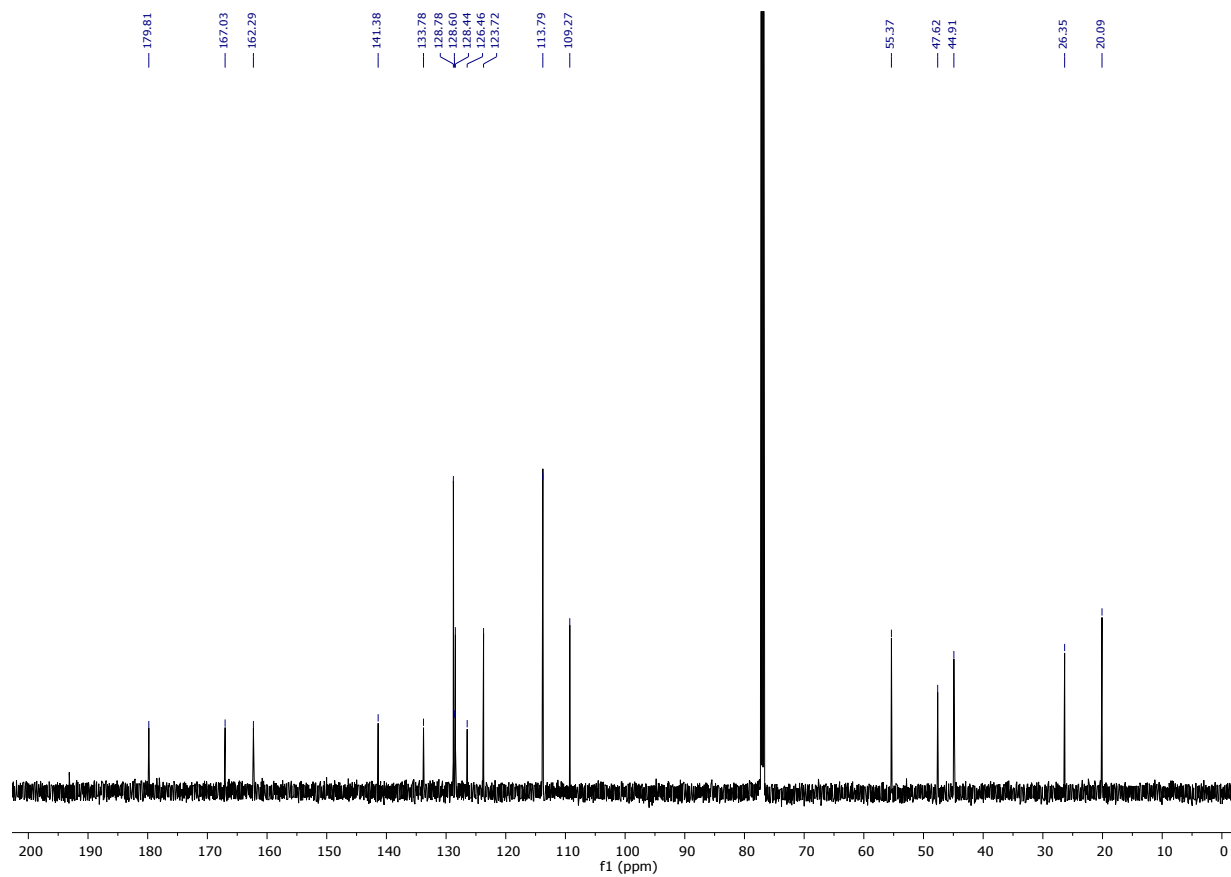

***N*-[(5-Bromo-1,3-dimethyl-2-oxindolin-3-yl)methyl]-4-methoxybenzamide (Table 2, 3q)**

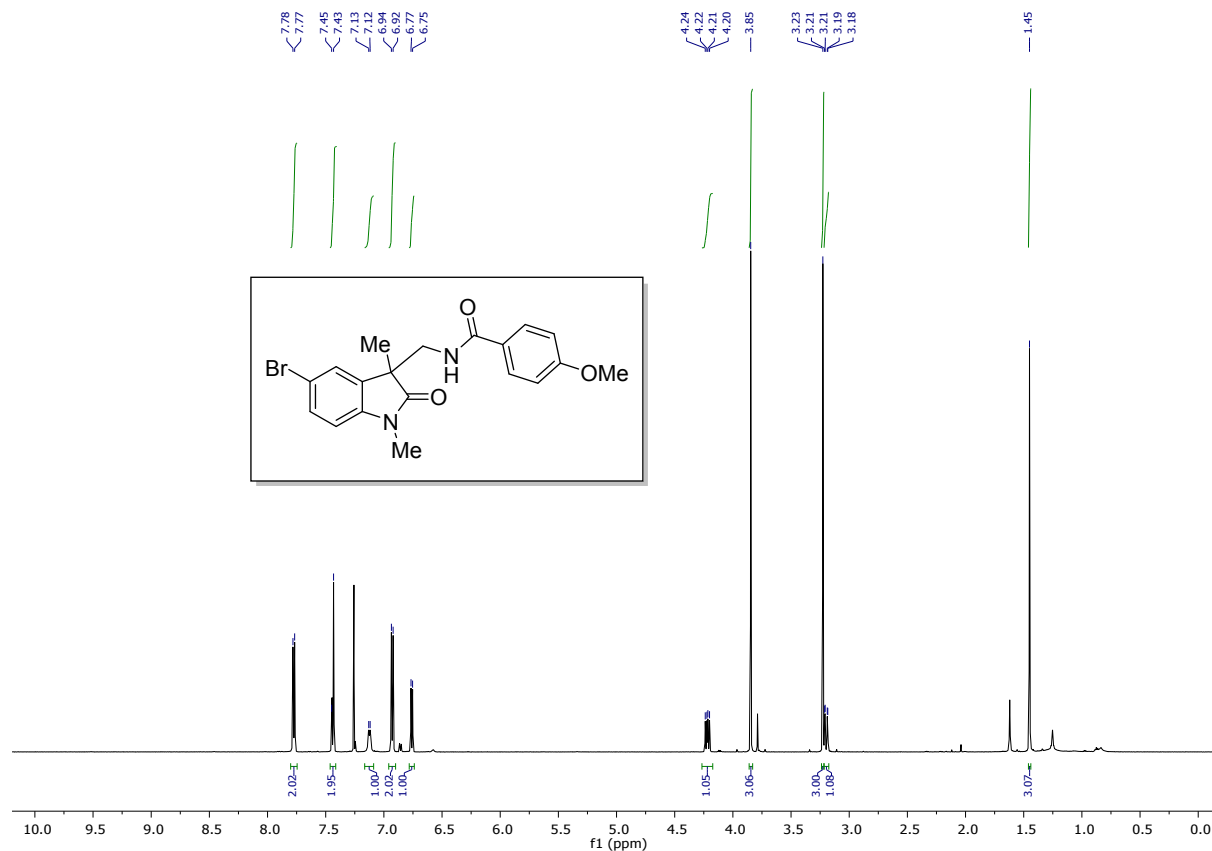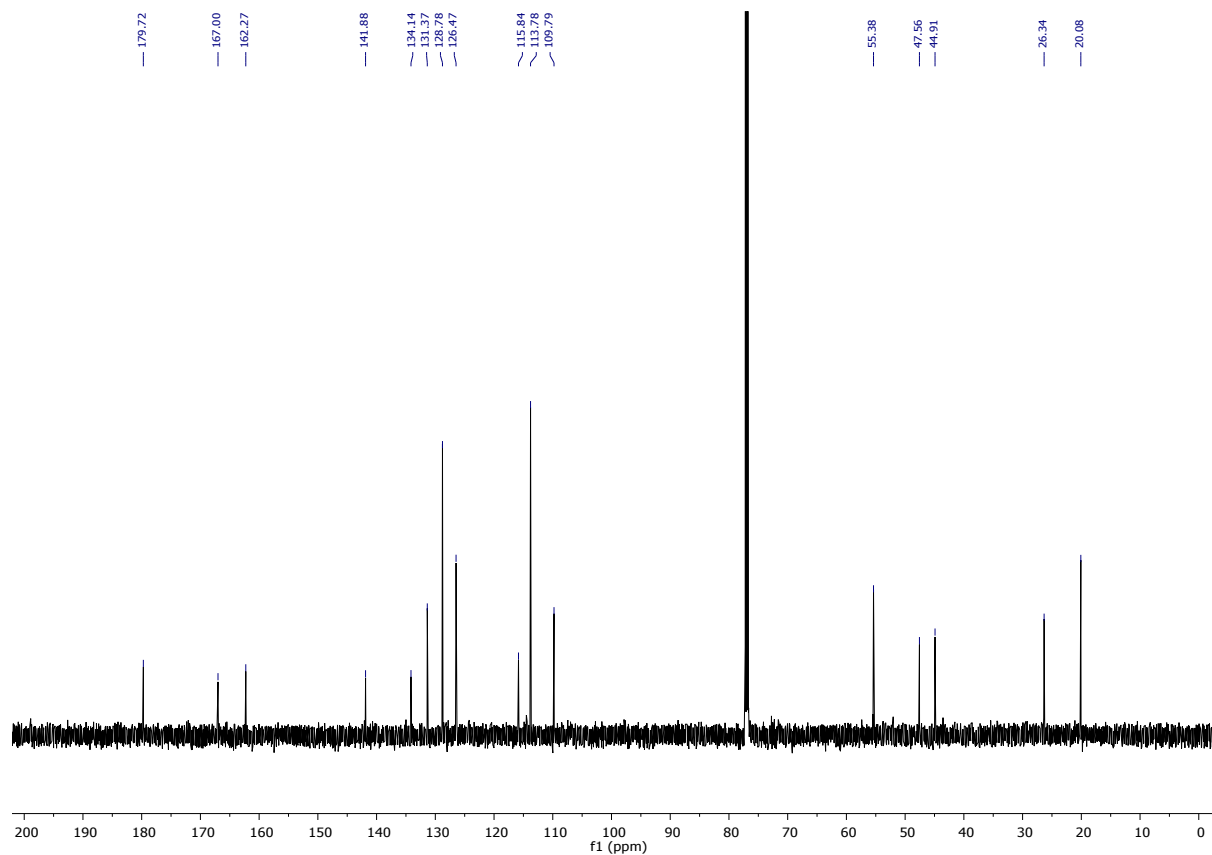

***N*-{[1,3-Dimethyl-2-oxo-5-(trifluoromethyl)indolin-3-yl]methyl}-4-methoxybenzamide**  
(Table 2, 3r)

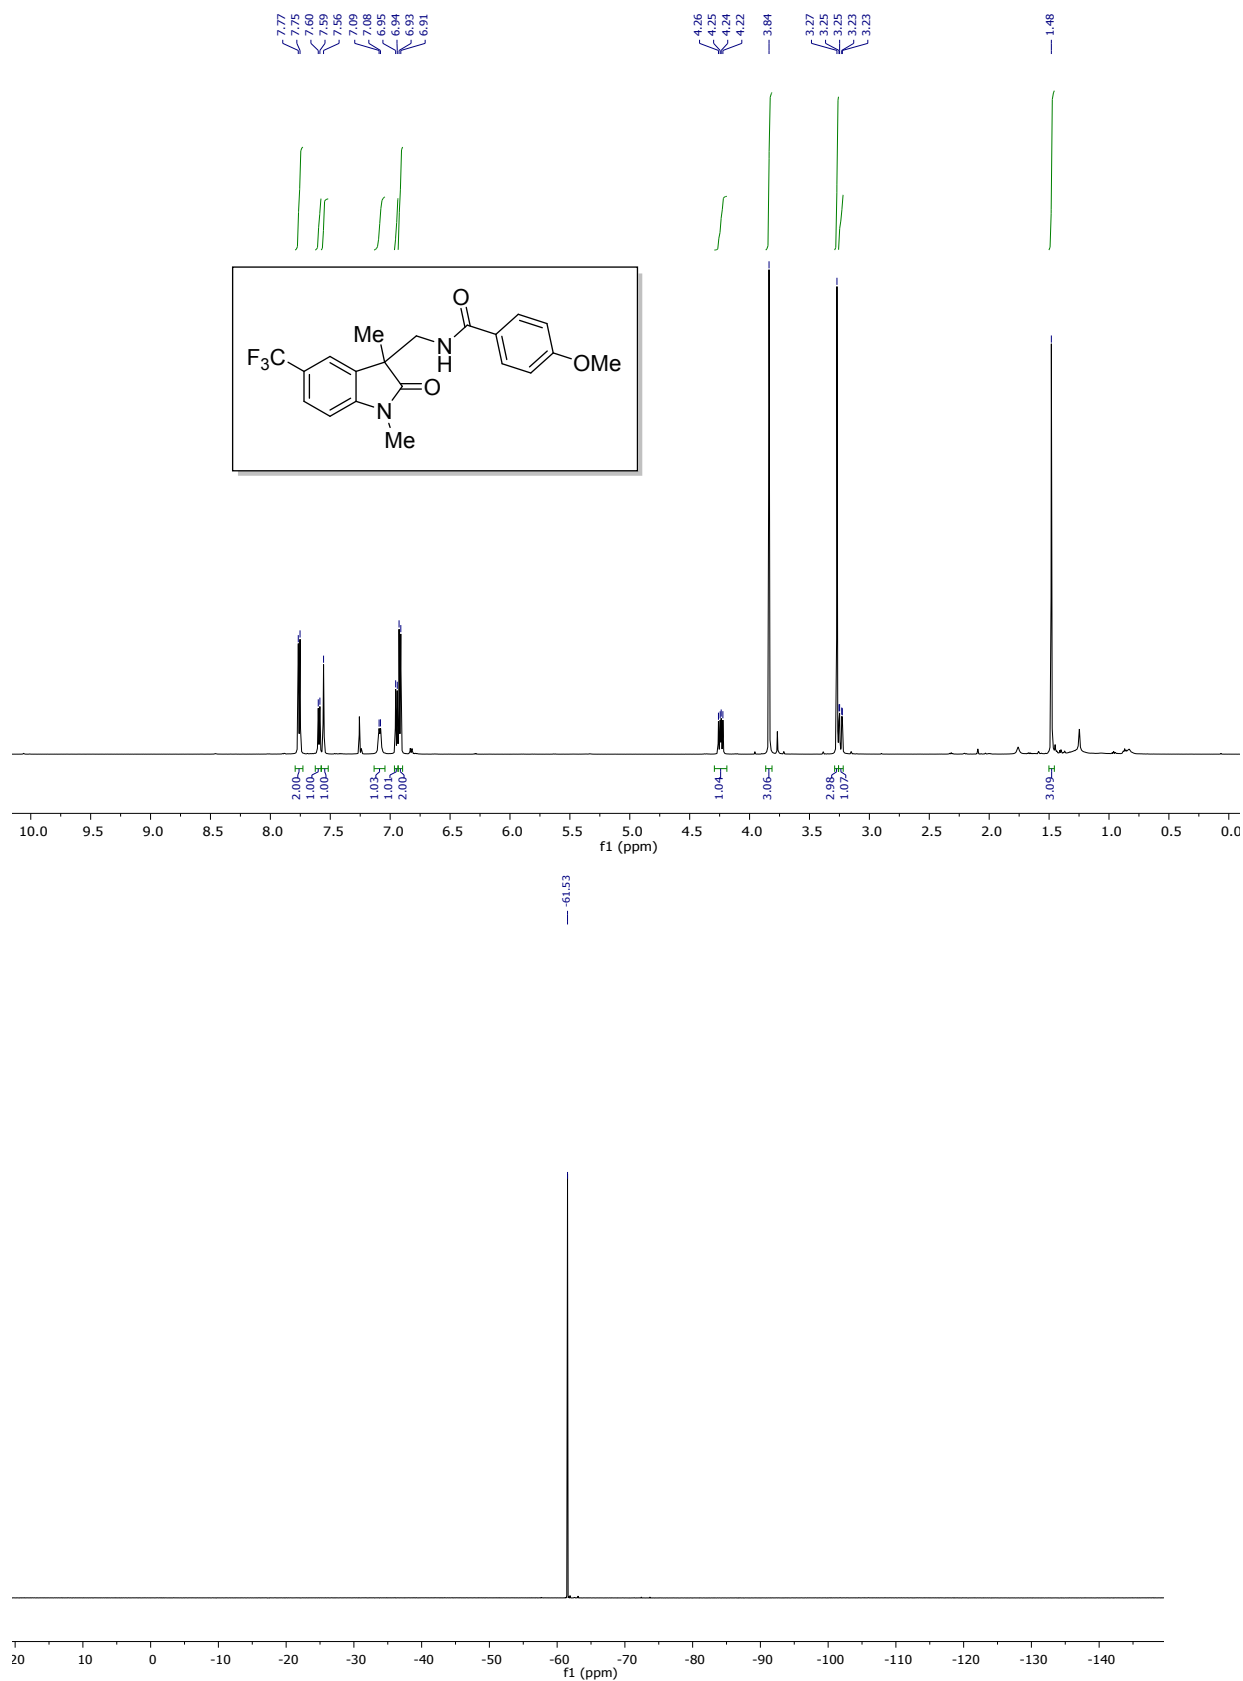

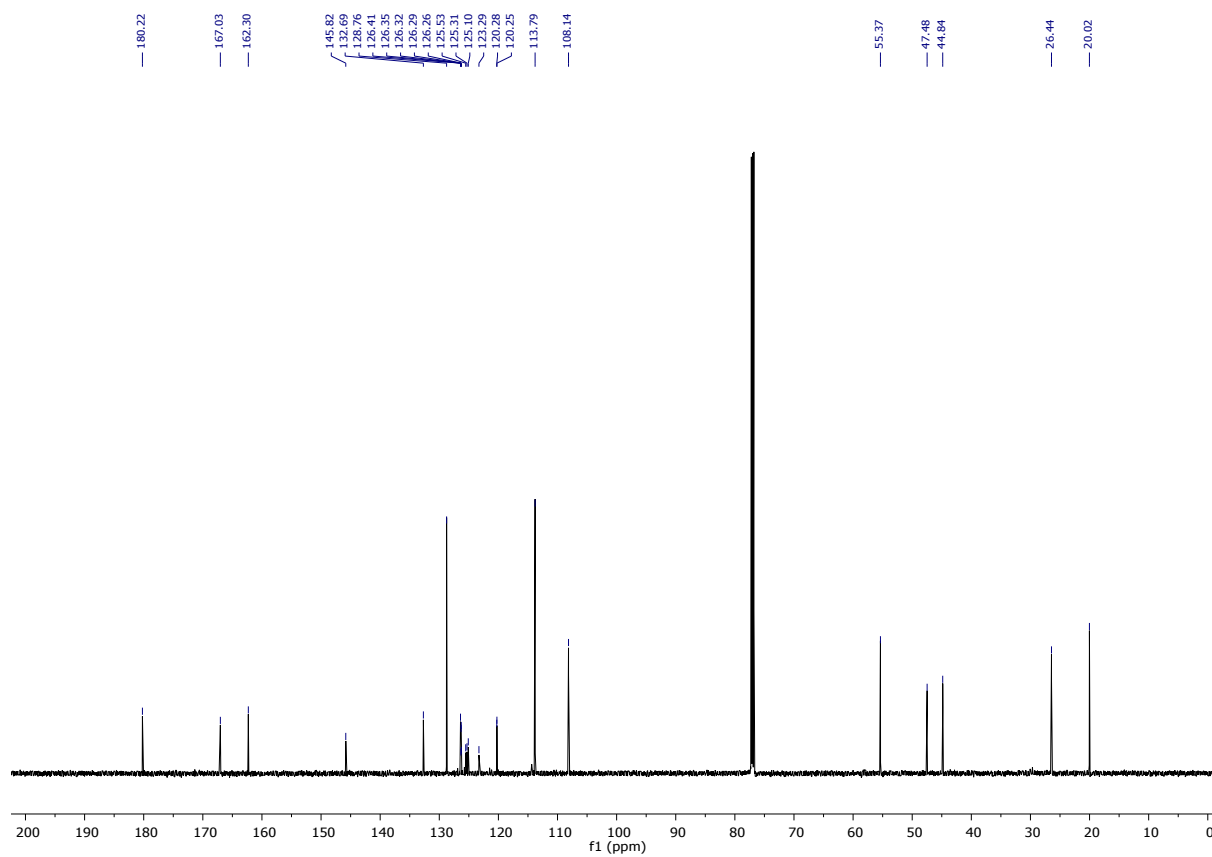

# 4-Methoxy-N-[(1,3,7-trimethyl-2-oxindolin-3-yl)methyl]benzamide (Table 2, 3s)

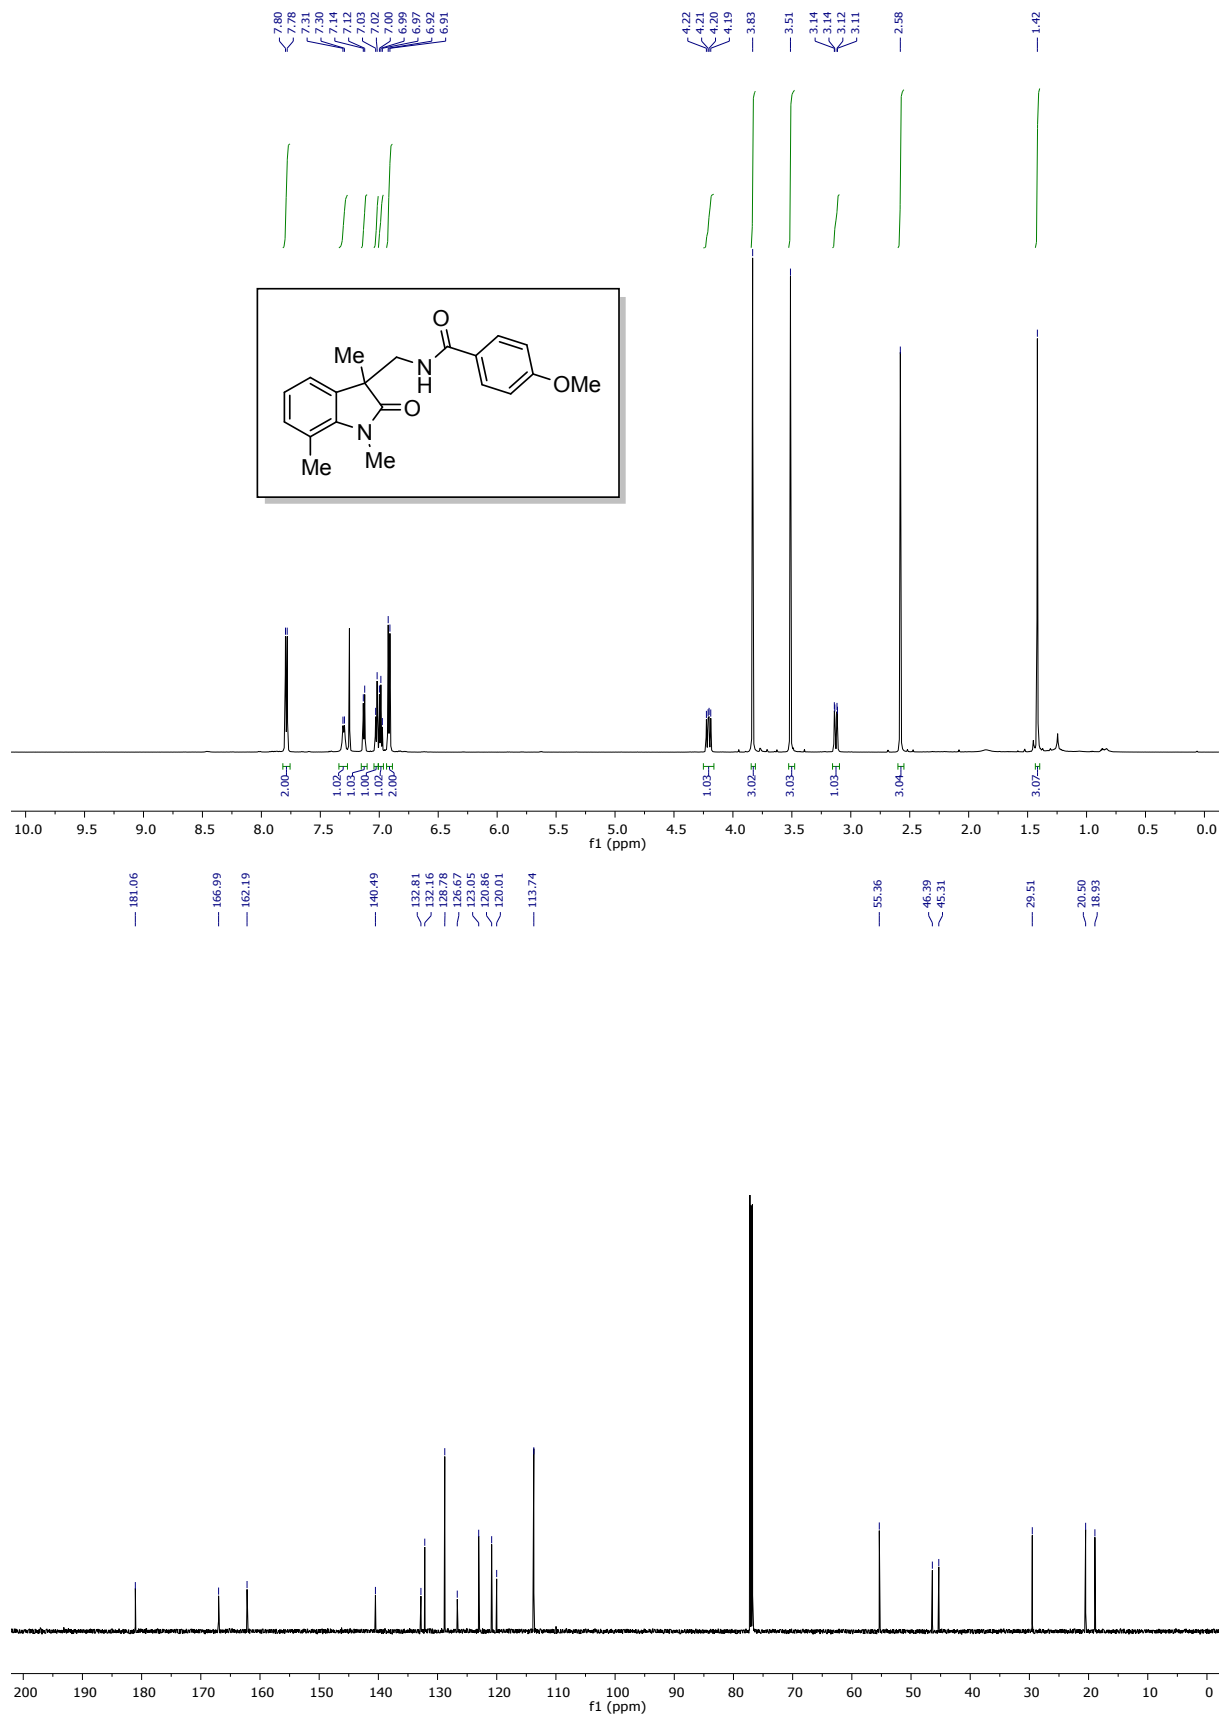

***N*-[(1,3-Dimethyl-2-oxo-7-phenylindolin-3-yl)methyl]-4-methoxybenzamide (Table 2, 3t)**

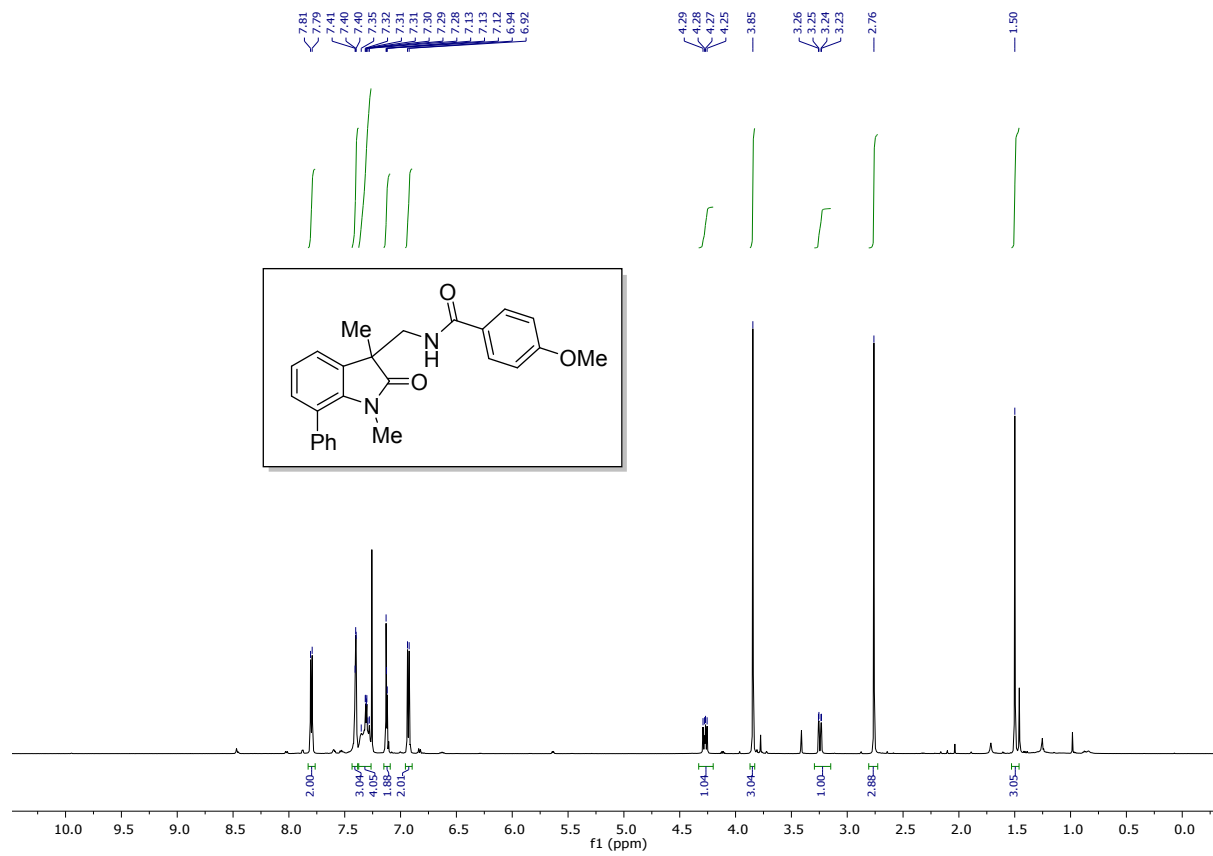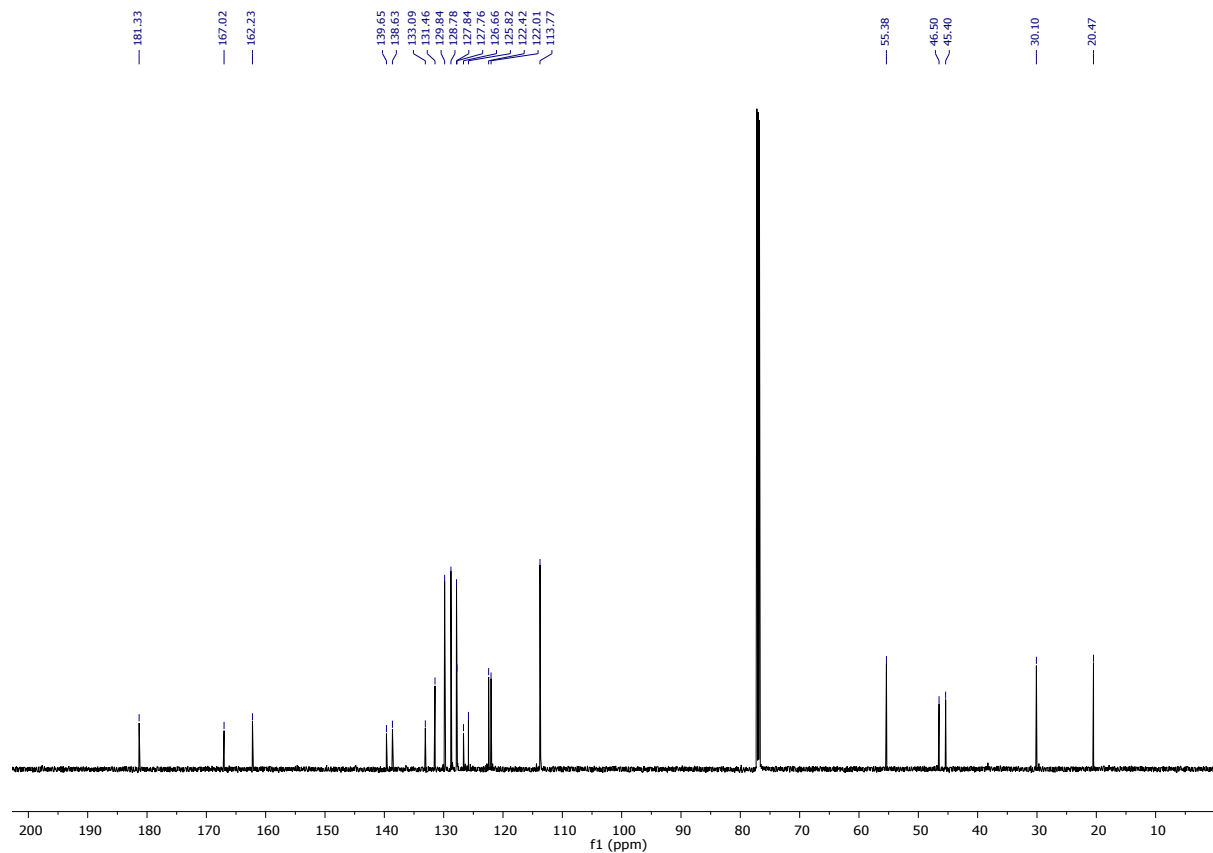

# 4-Methoxy-N-[(1,3,4,6-tetramethyl-2-oxindolin-3-yl)methyl]benzamide (Table 2, 3u)

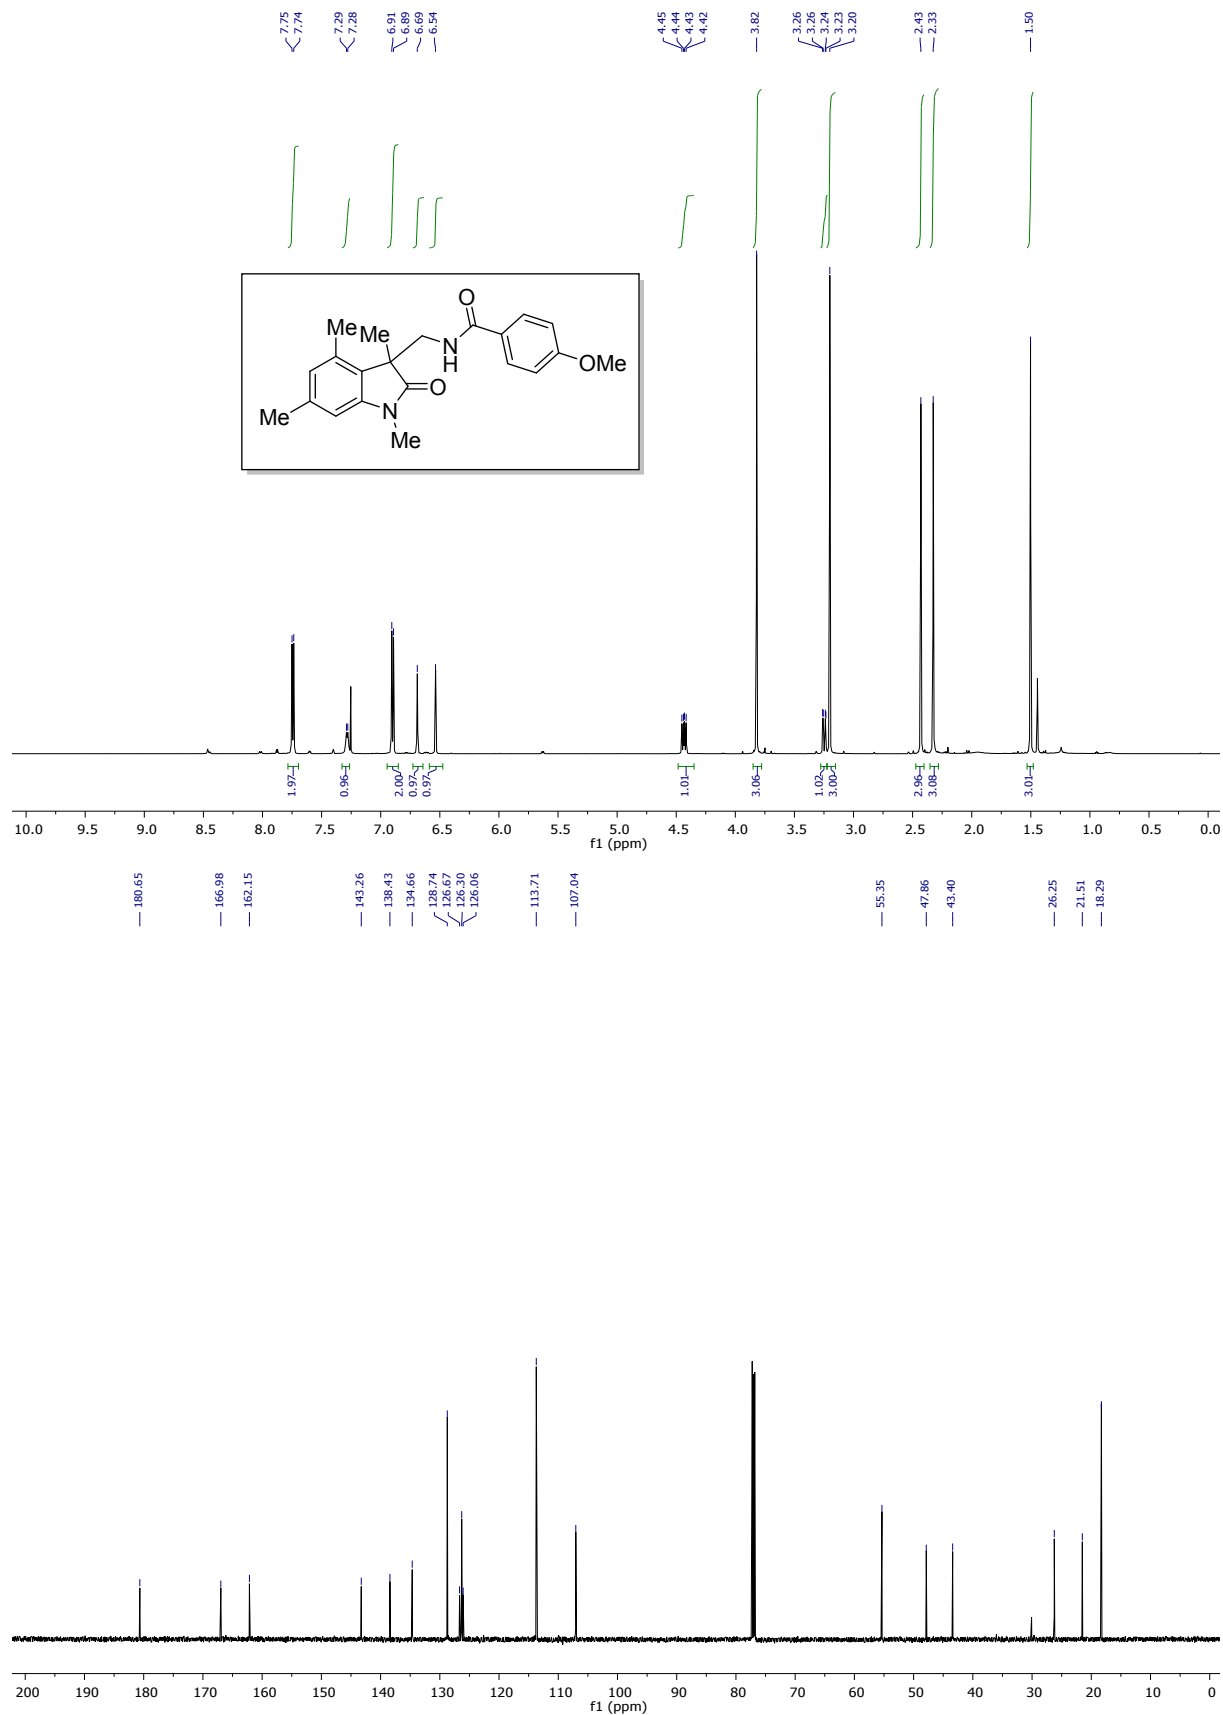



***N*-[(4,6-Difluoro-5-methoxy-1,3-dimethyl-2-oxindolin-3-yl)methyl]-4-methoxybenzamide (Table 2, 3v)**

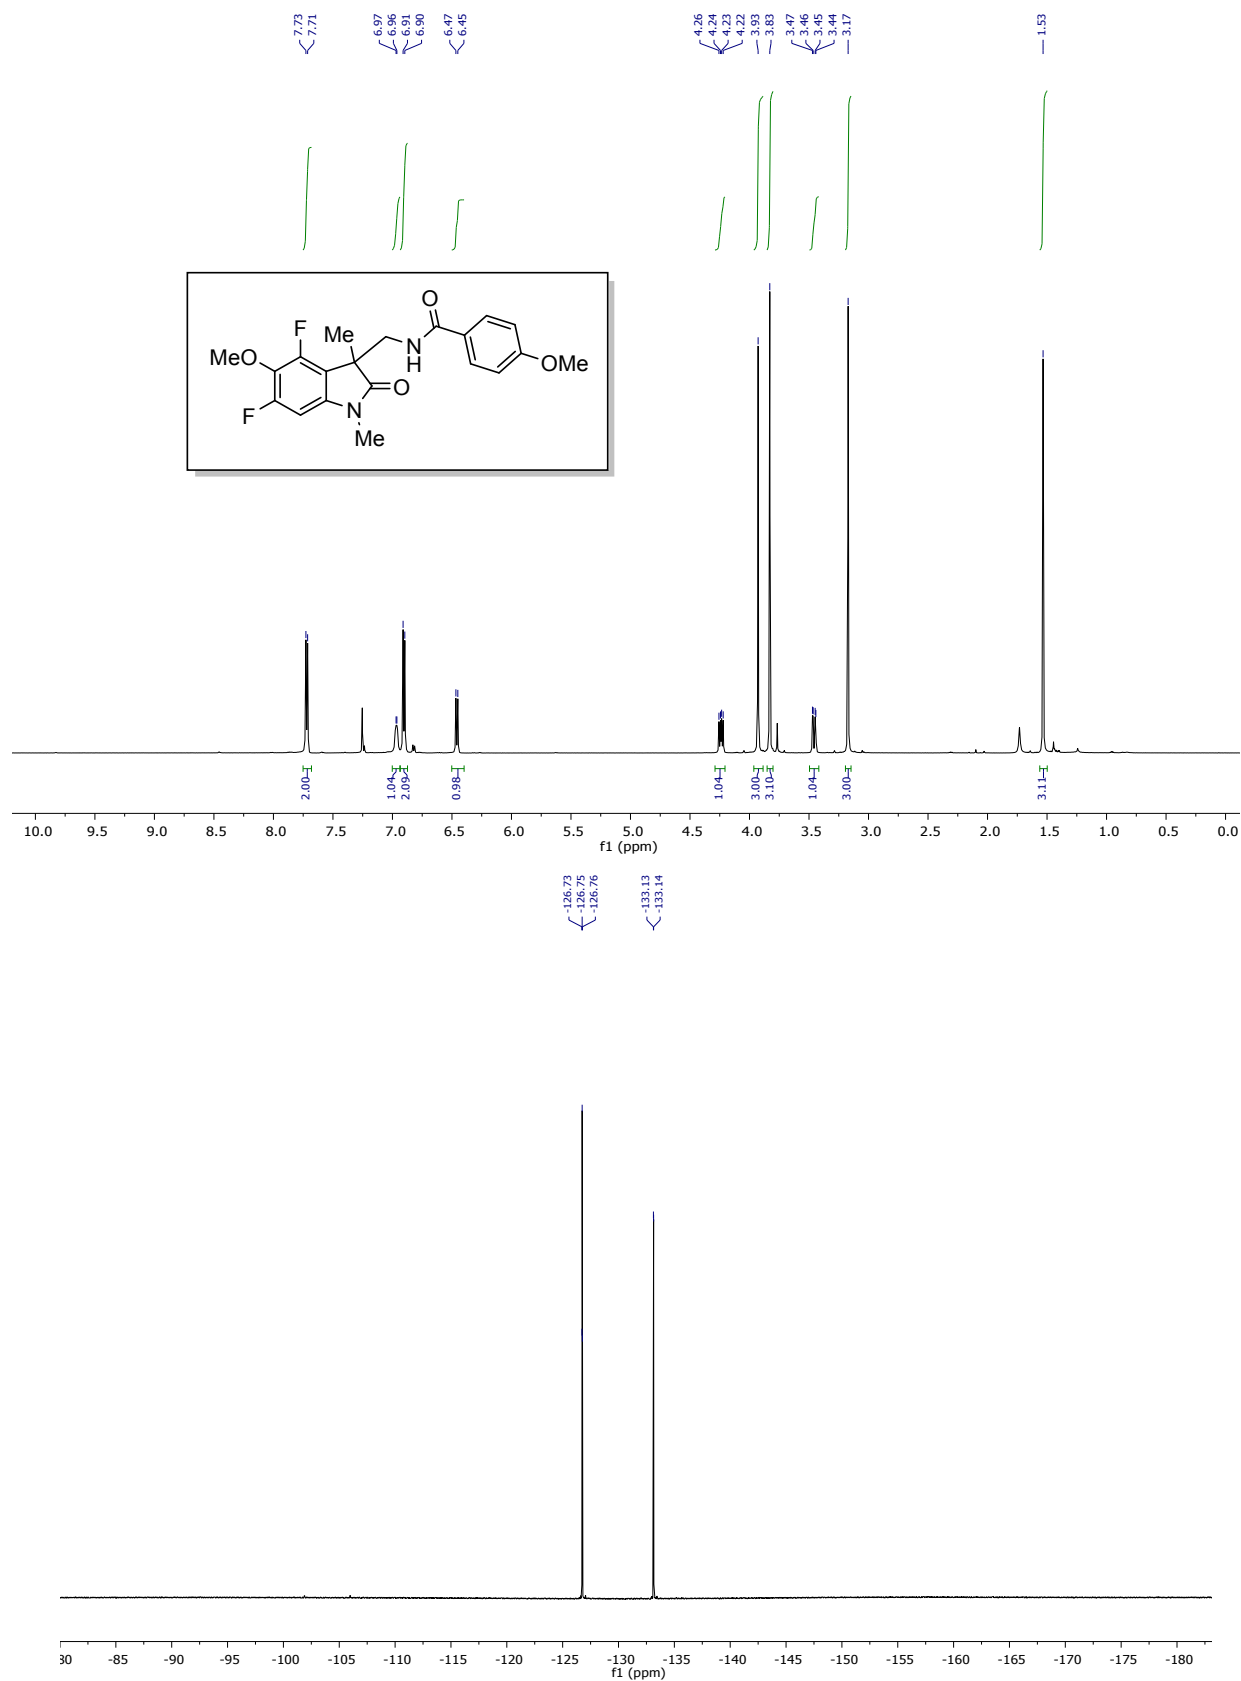

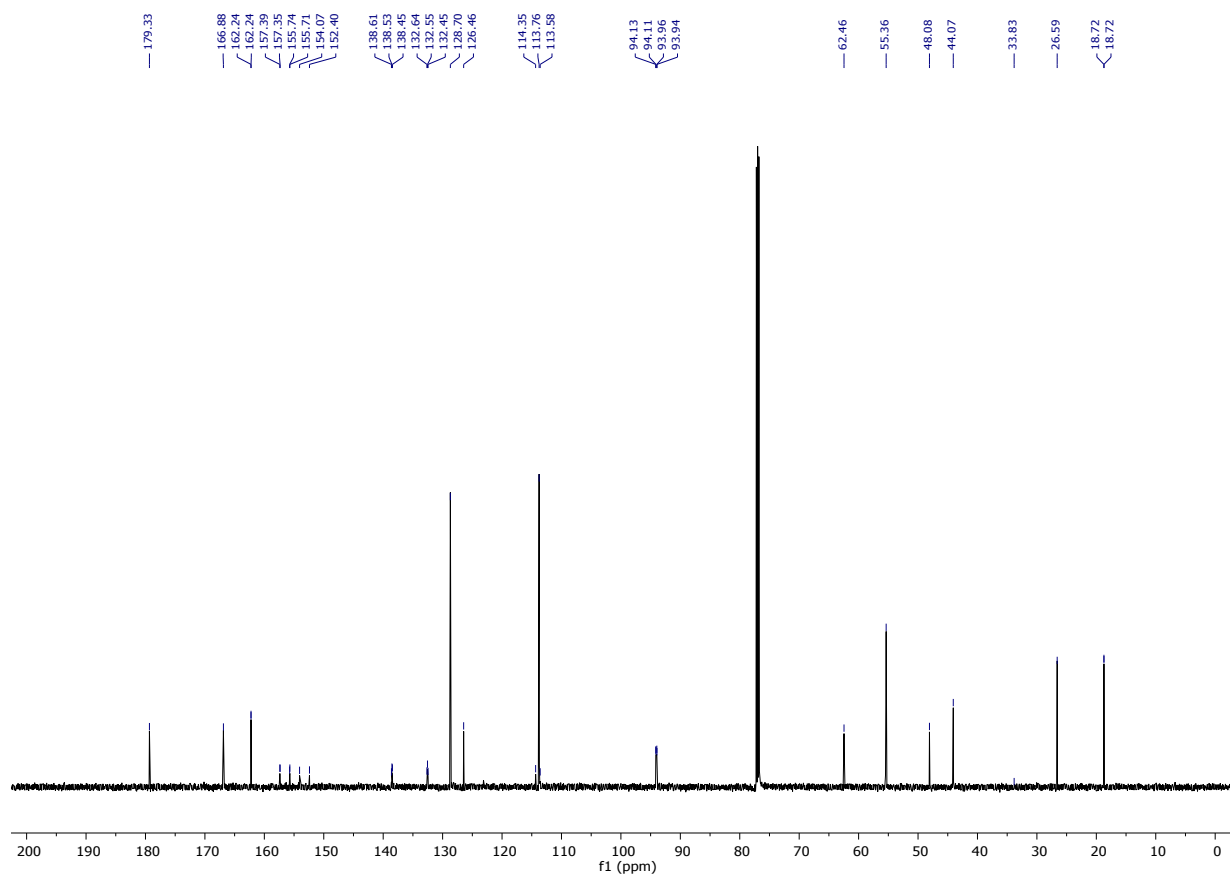

4-Methoxy-N-[1'-methyl-2'-oxospiro(cyclopentane-1,3'-indolin)-2-yl]benzamide (Table 3, 5a)

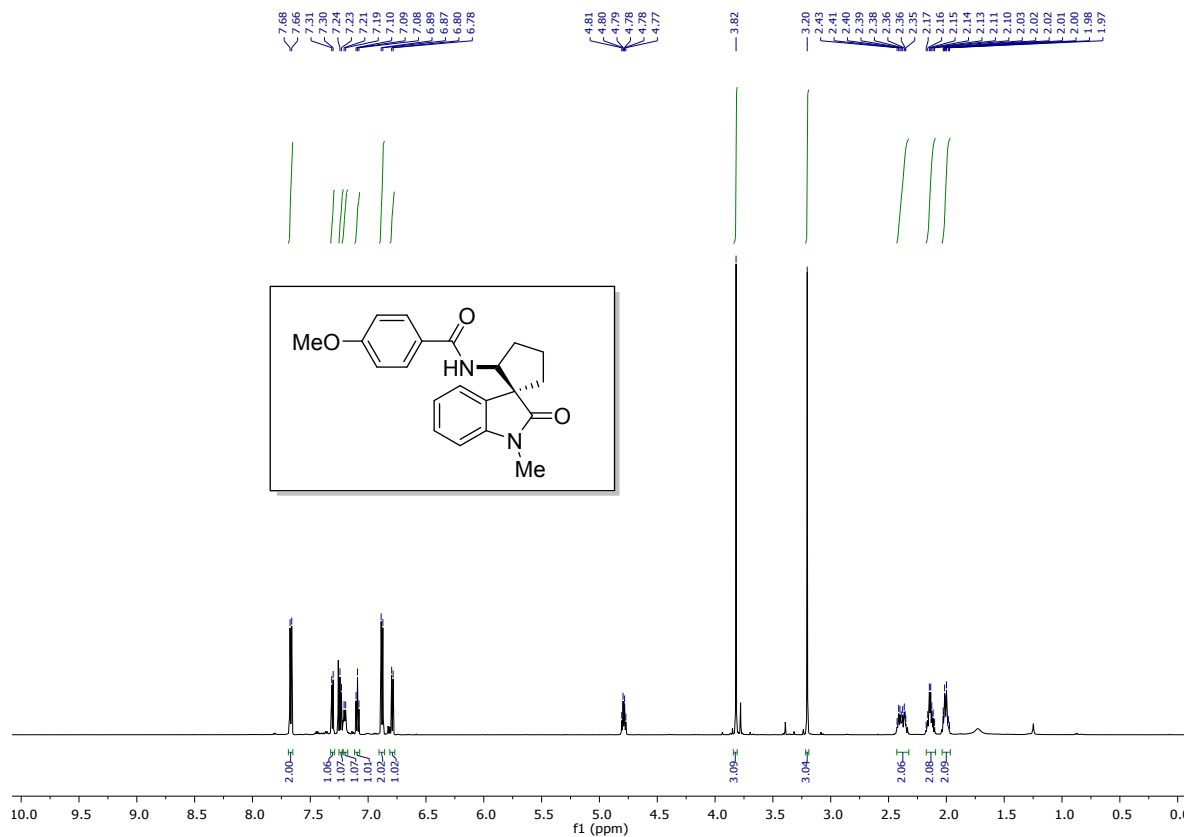

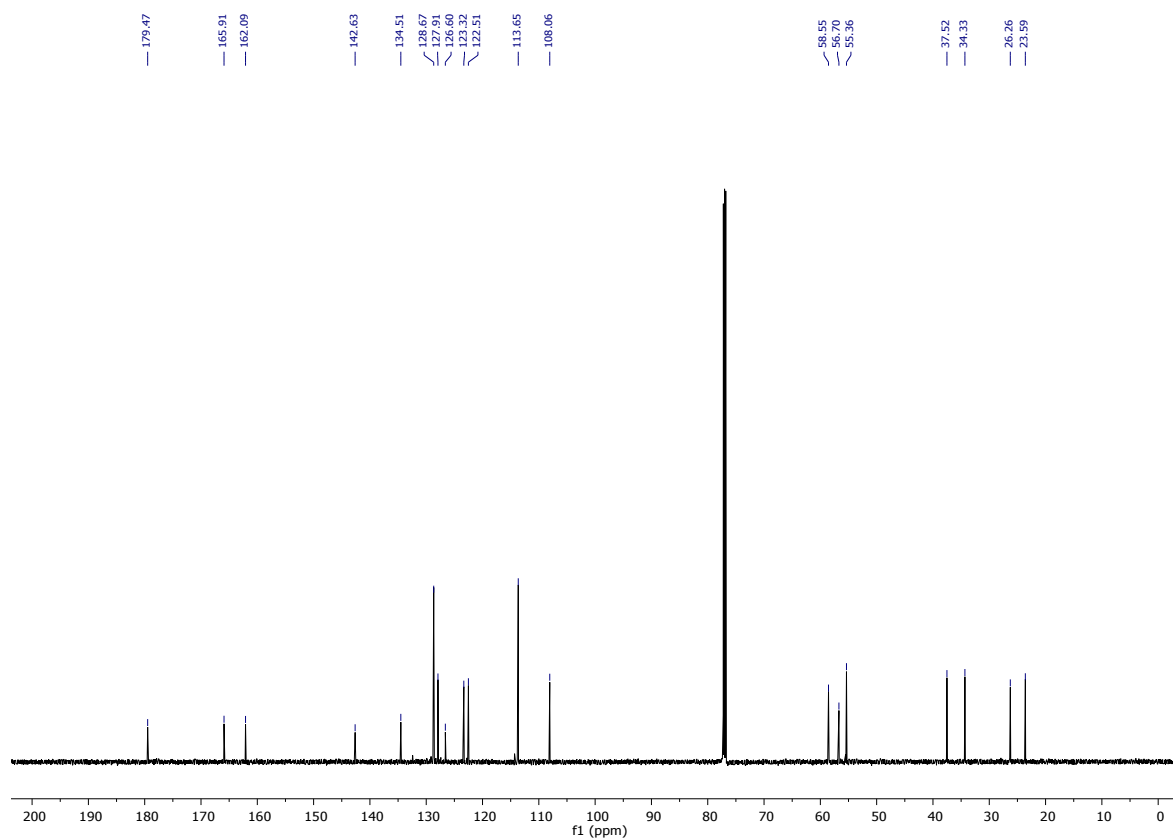

***N*-(1'-Methyl-2'-oxospiro[cyclopentane-1,3'-indolin]-2-yl)benzamide (Table 3, 5b)**

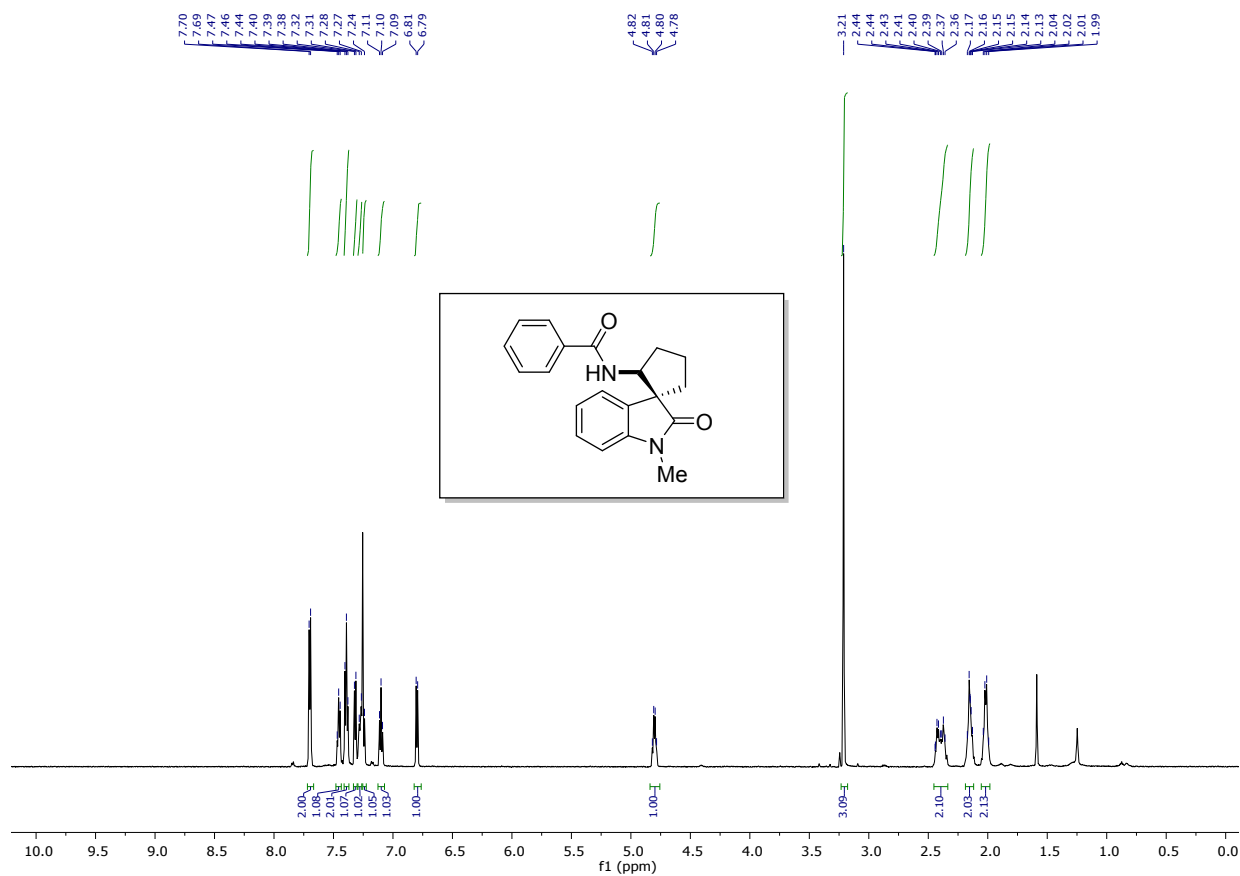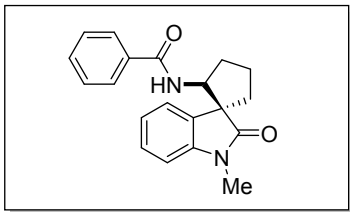

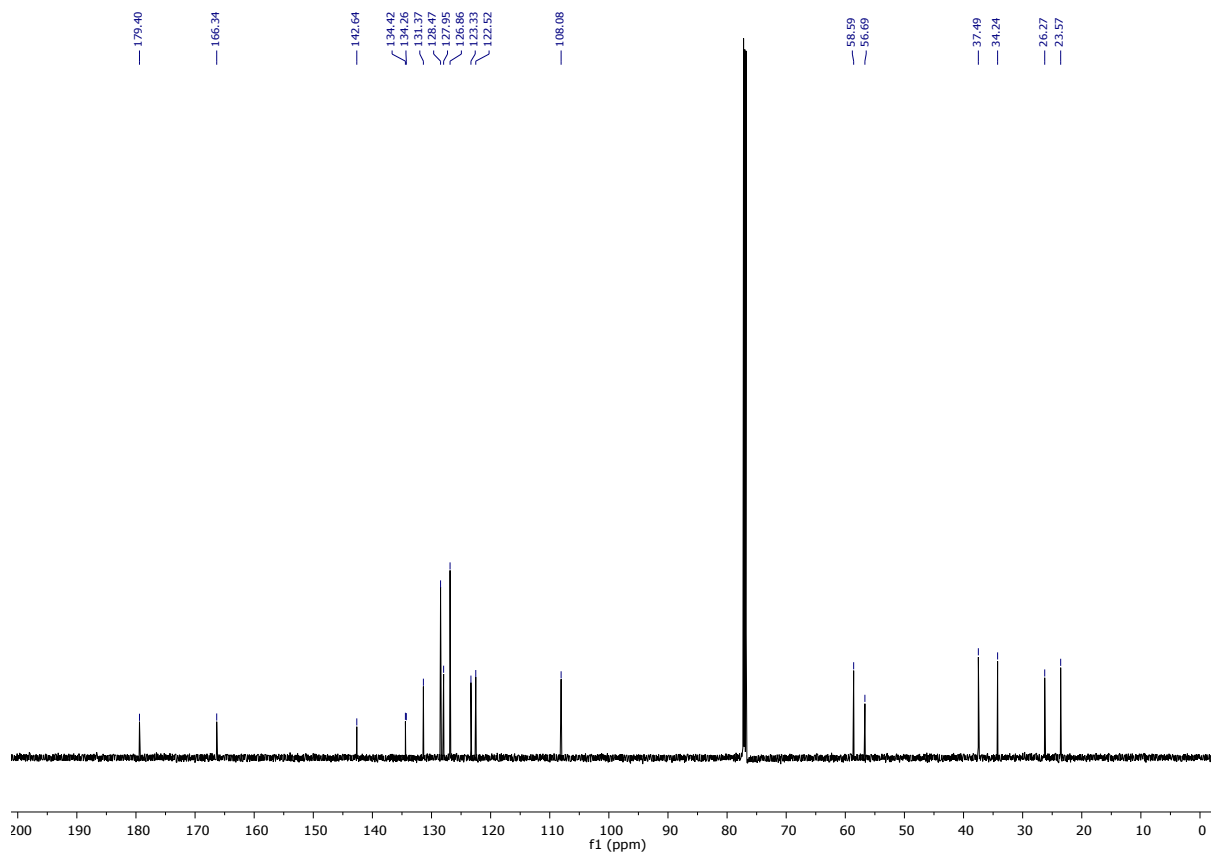

**4-Chloro-*N*-[1'-methyl-2'-oxospiro(cyclopentane-1,3'-indolin)-2-yl]benzamide (Table 3, 5c)**

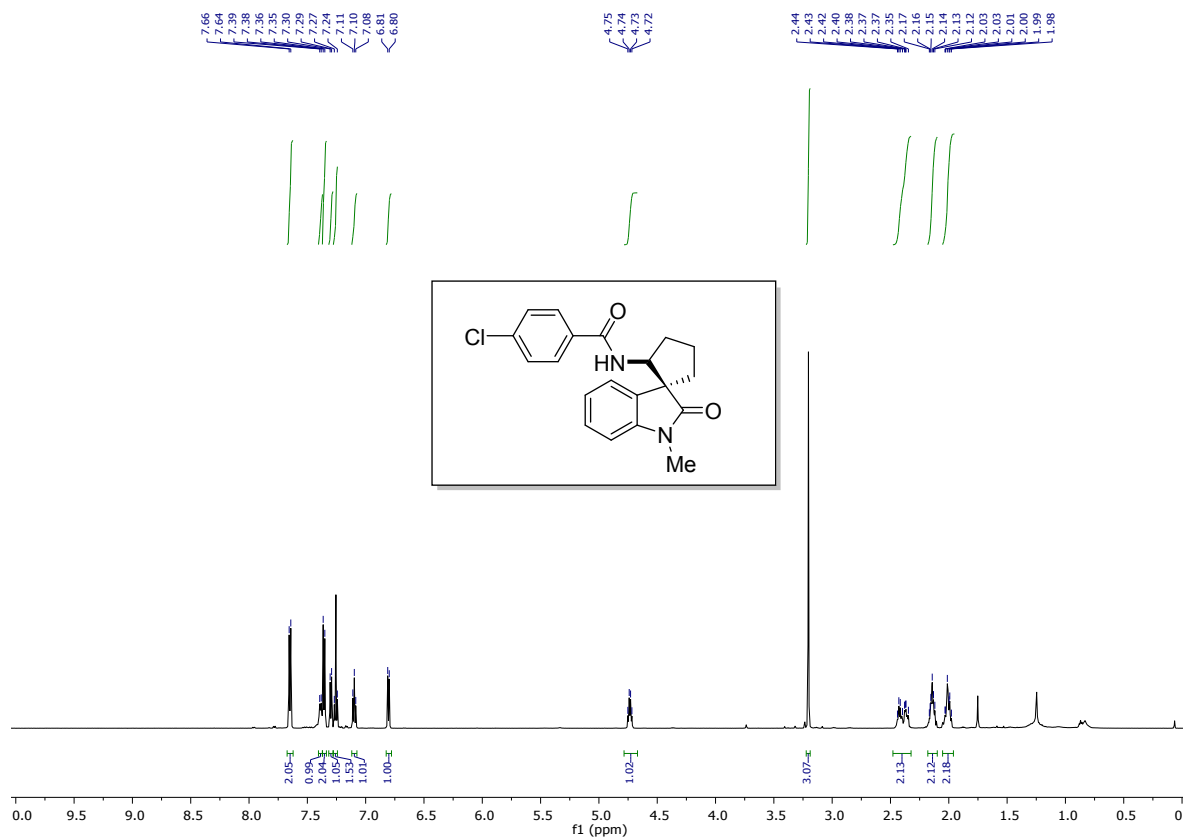

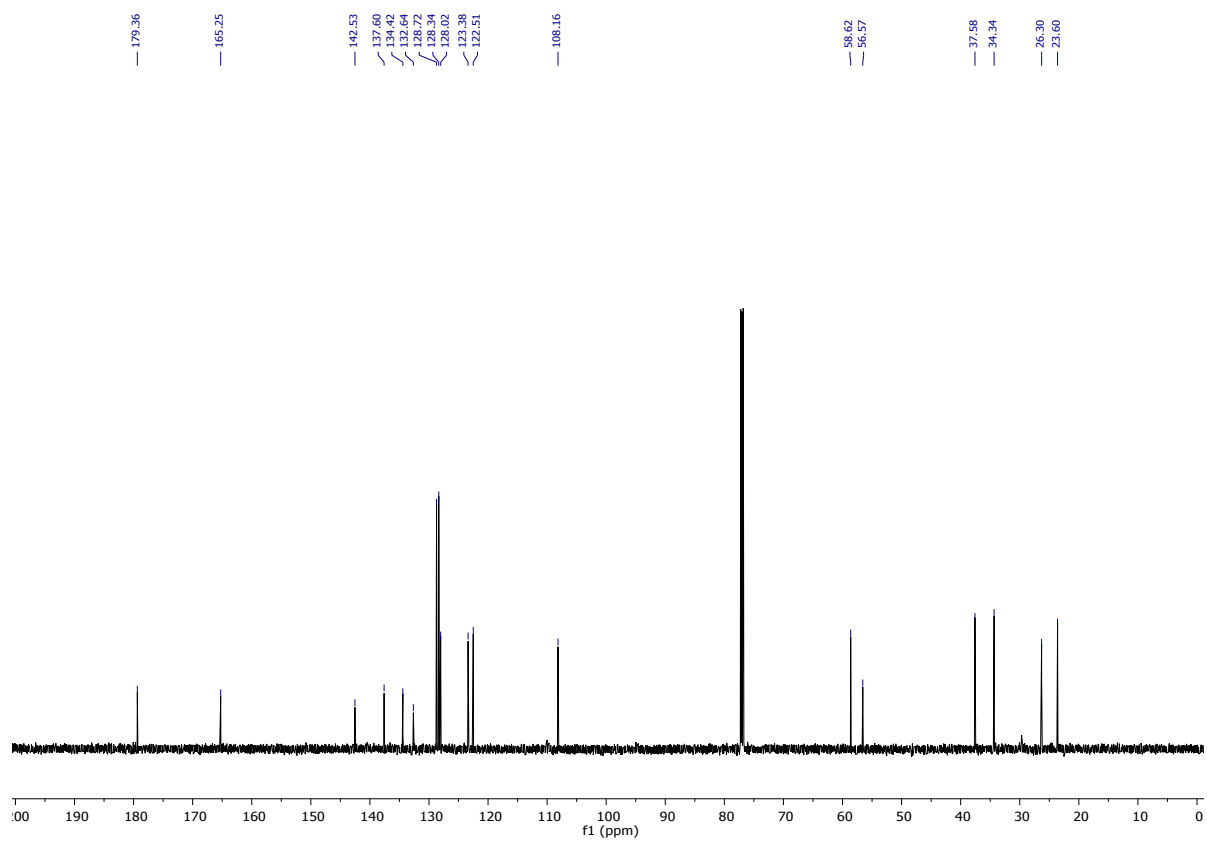

**4-Bromo-*N*[1'-methyl-2'-oxospiro(cyclopentane-1,3'-indolin)-2-yl]benzamide (Table 3, 5d)**

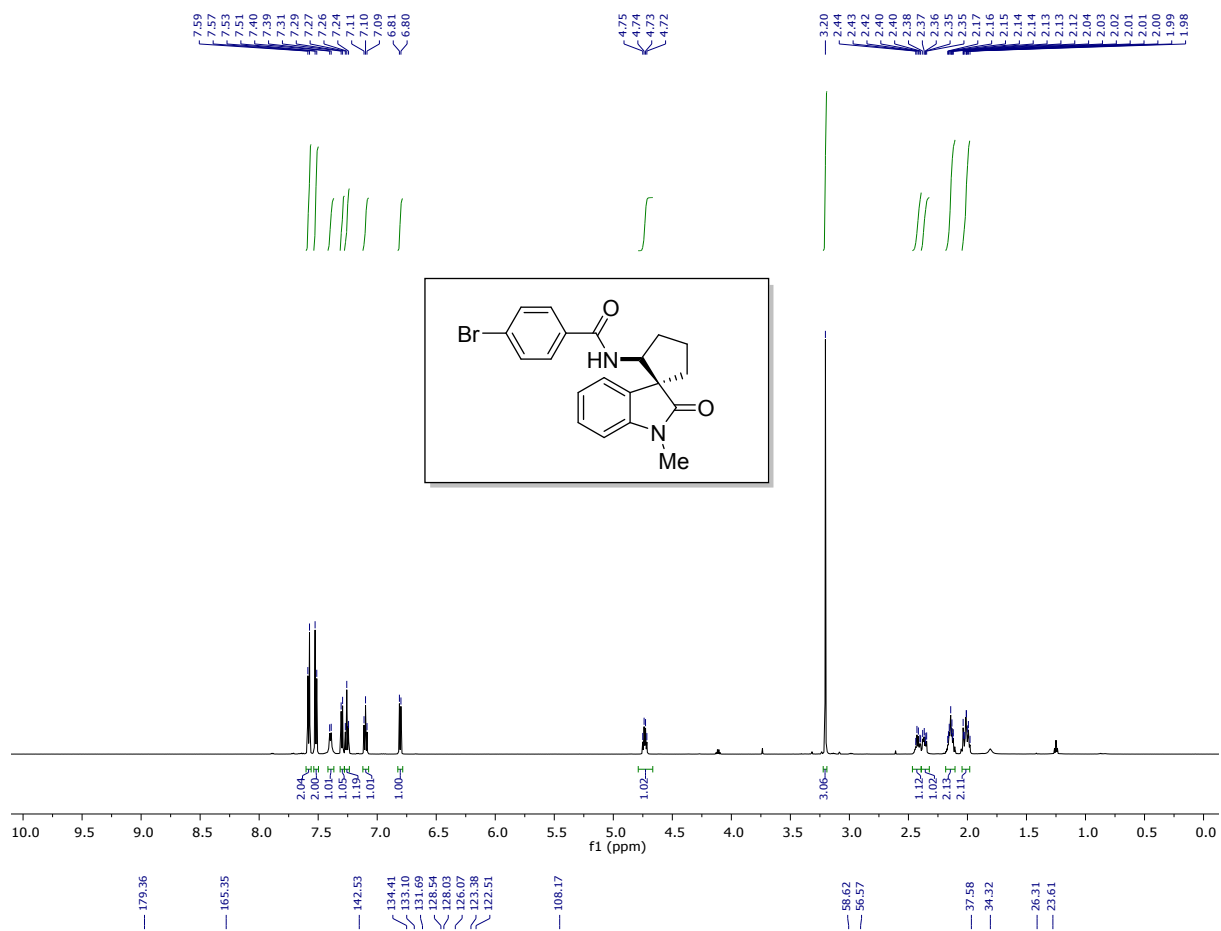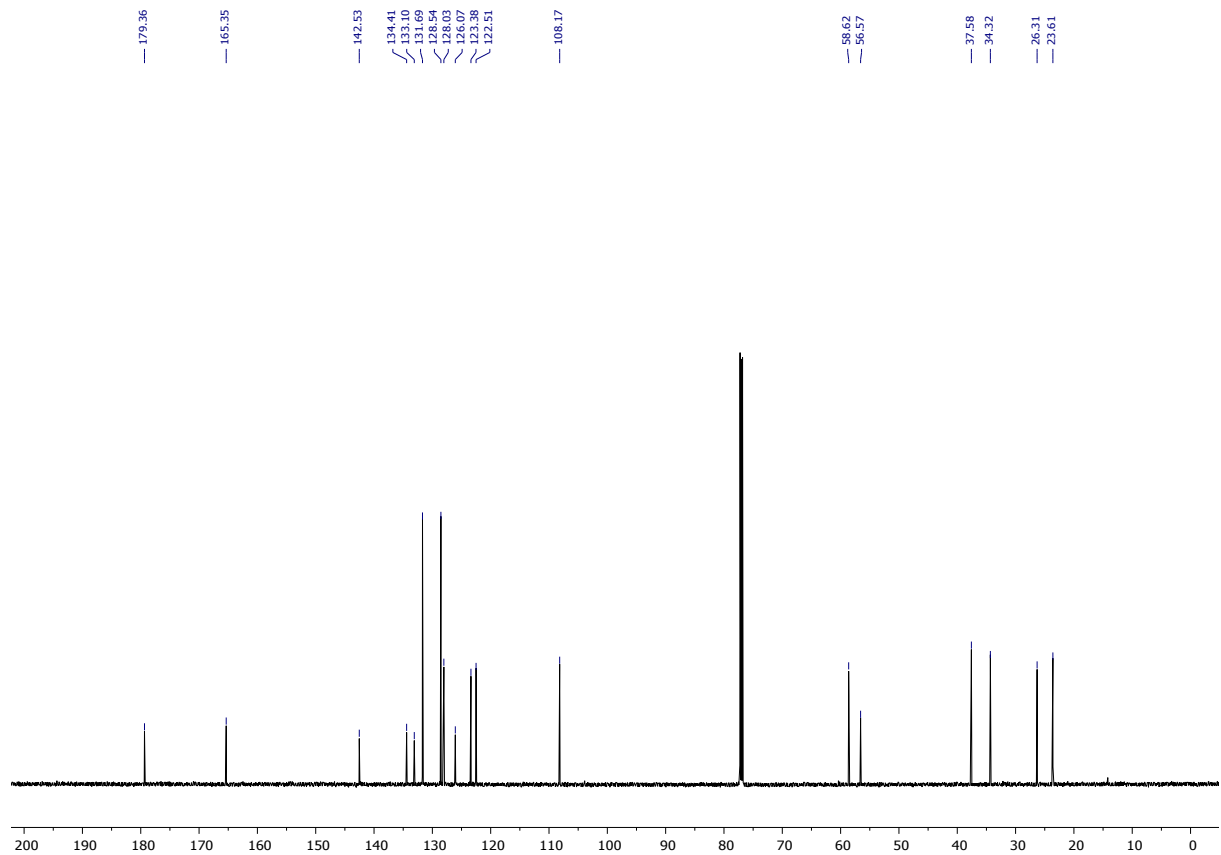

***N*-[1'-Methyl-2'-oxospiro(cyclopentane-1,3'-indolin)-2-yl]-4-(trifluoromethyl)-benzamide**  
**(Table 3, 5e)**

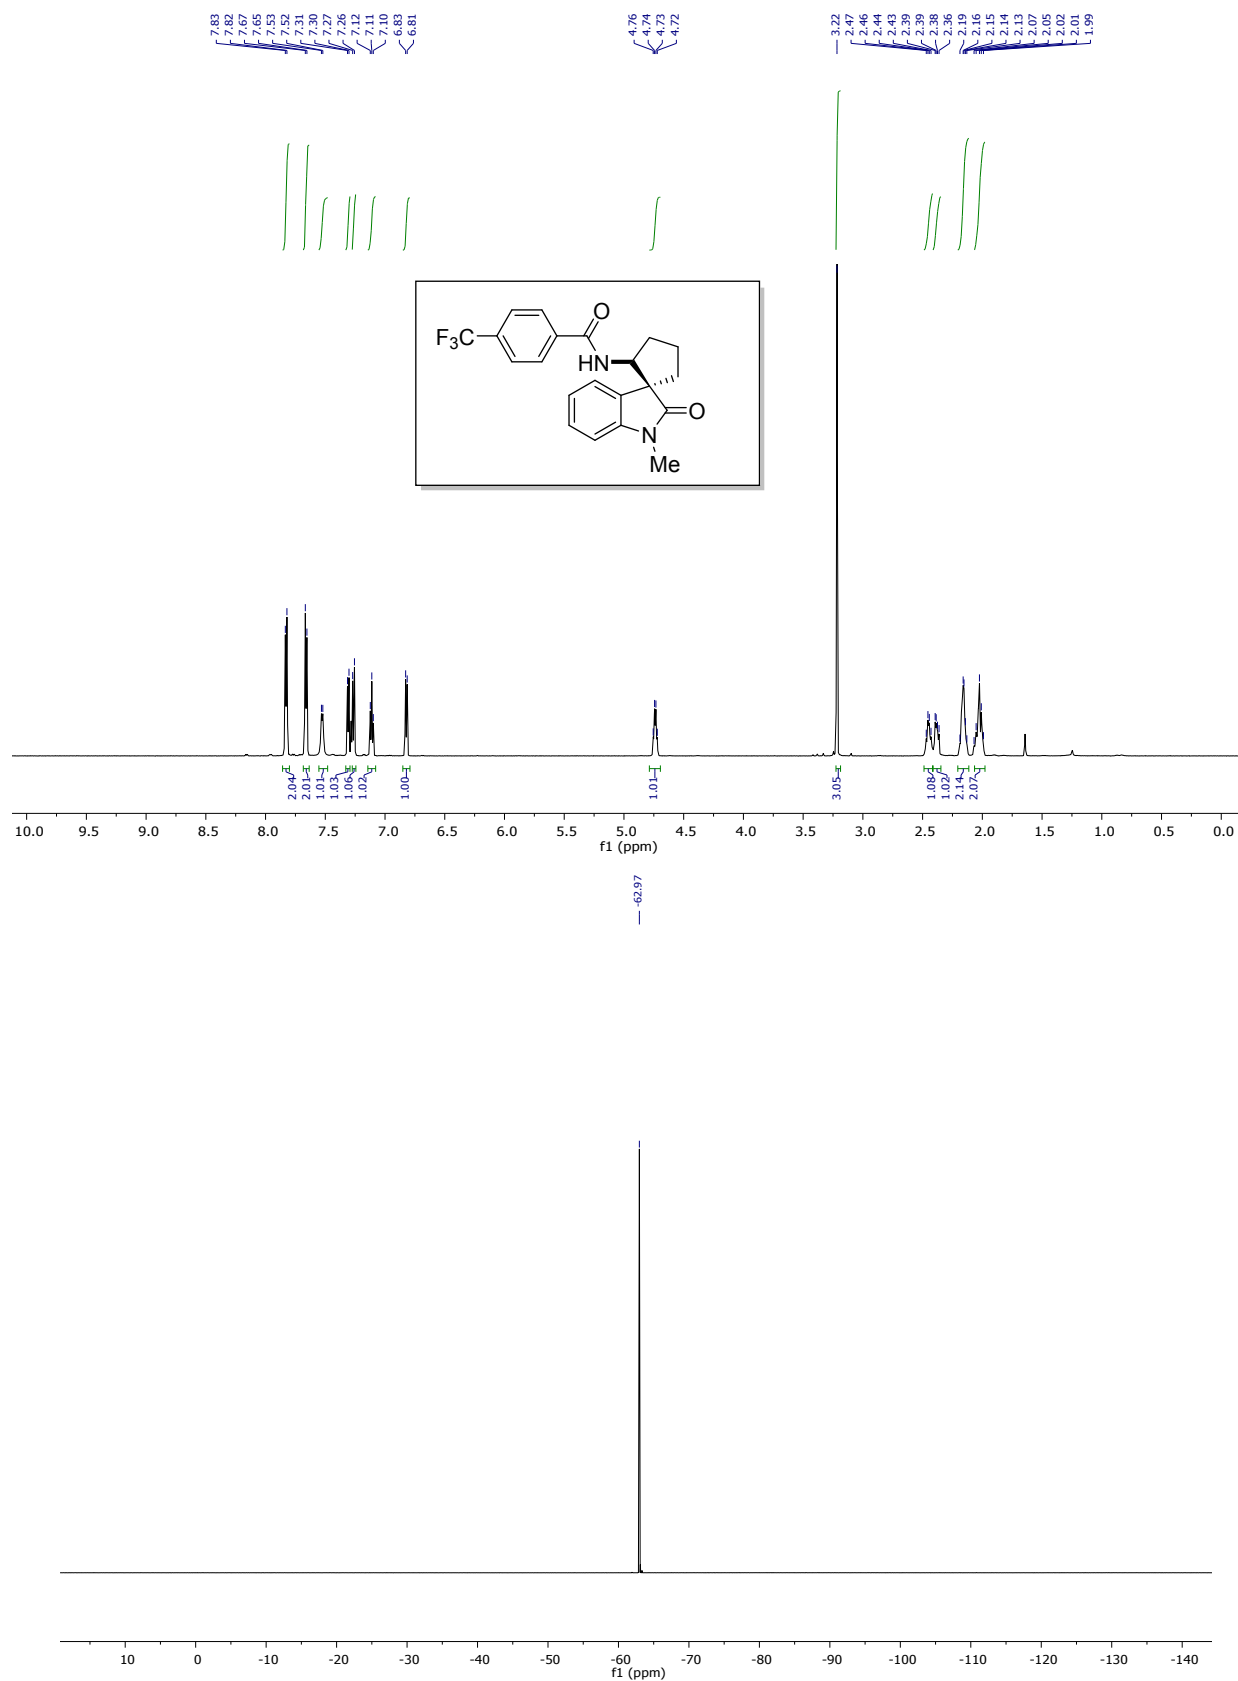



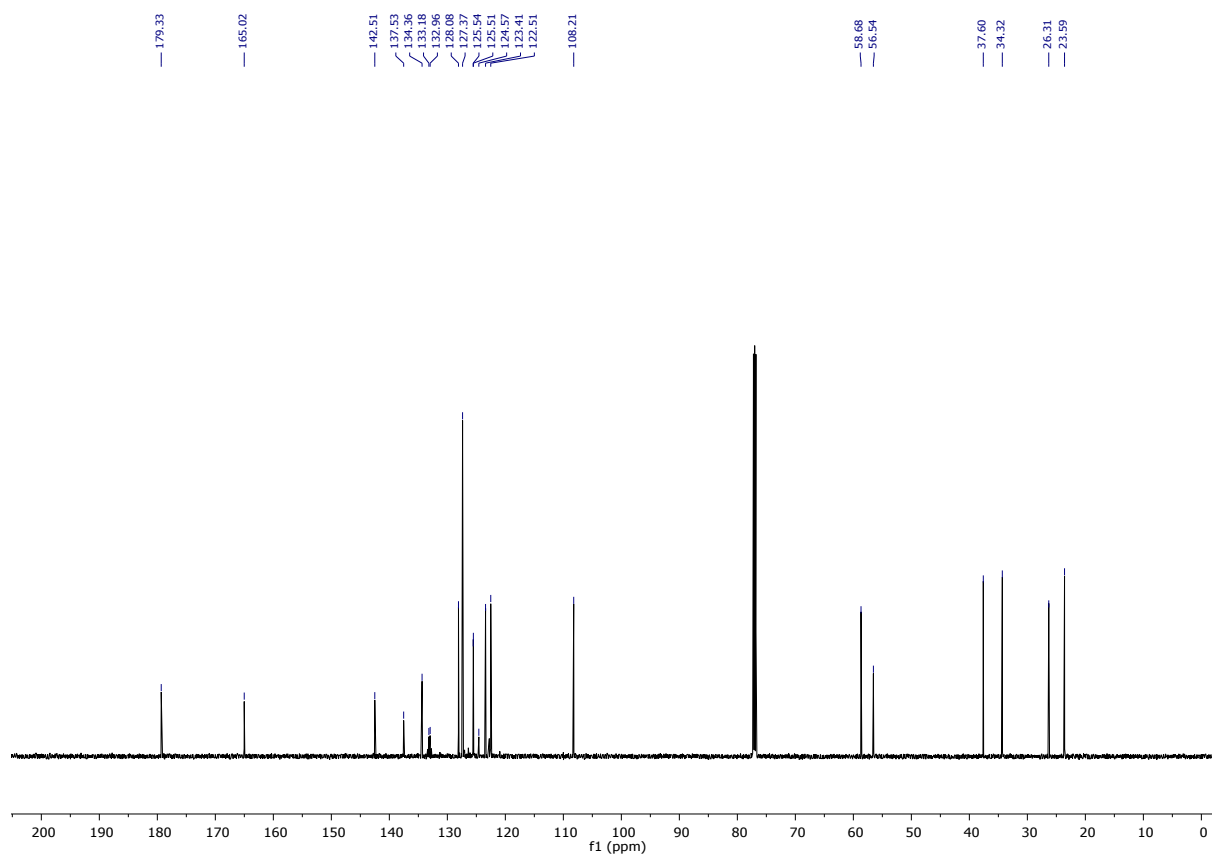

4-Cyano-N-[1'-methyl-2'-oxospiro(cyclopentane-1,3'-indolin)-2-yl]benzamide (Table 3, 5f)

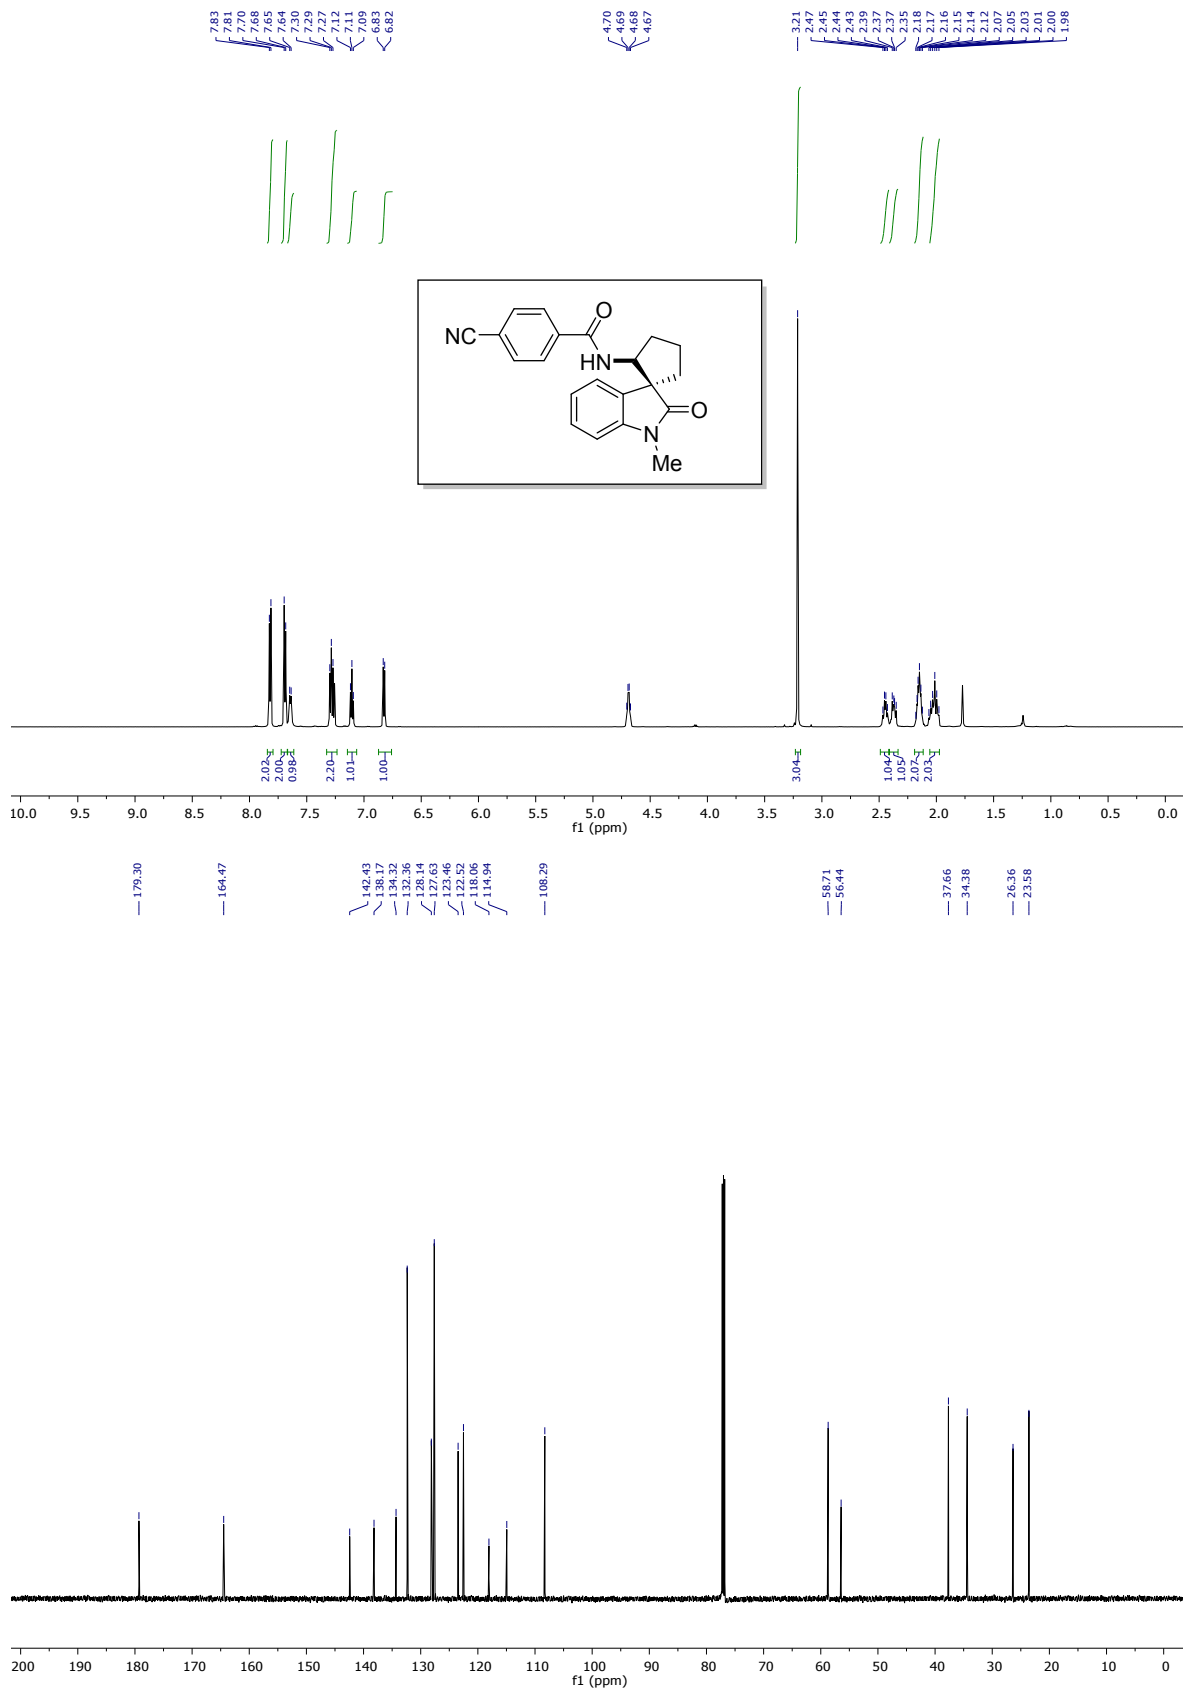

**3,5-Dimethyl-N-[1'-methyl-2'-oxospiro(cyclopentane-1,3'-indolin)-2-yl]benzamide (Table 3, 5g)**

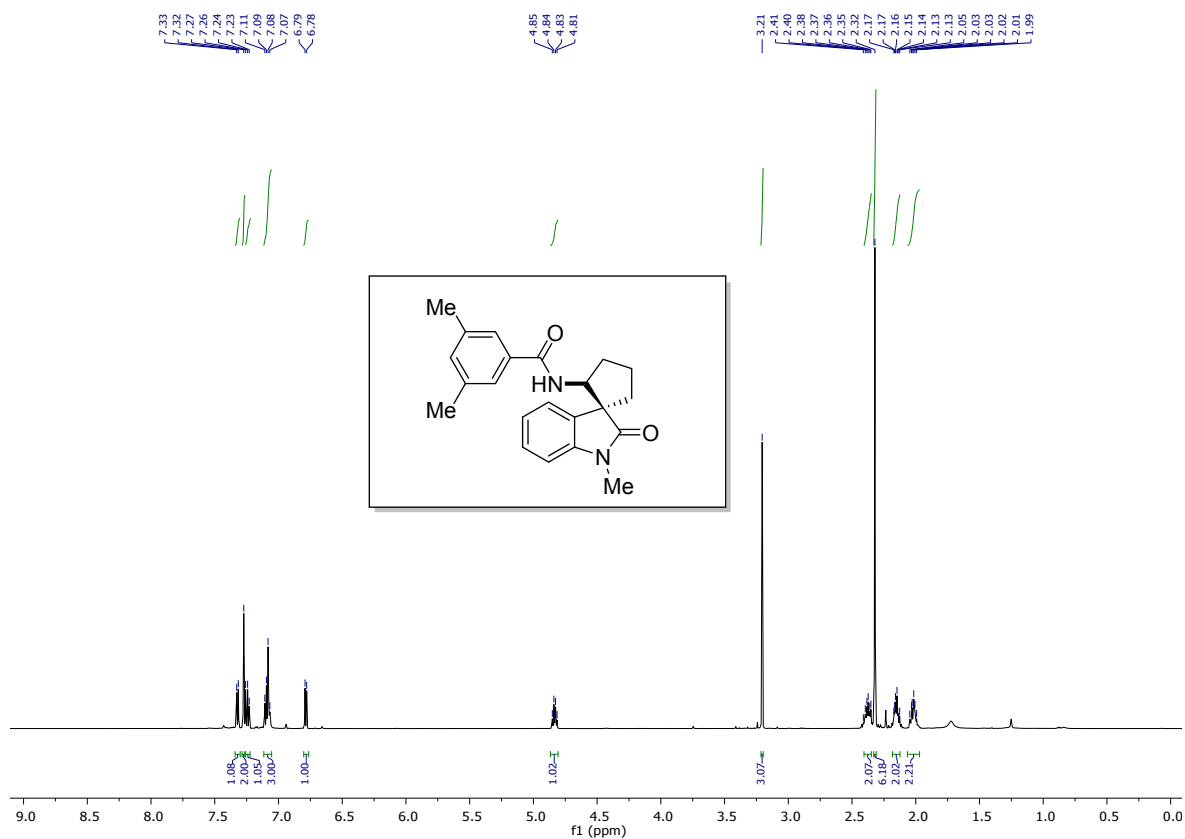

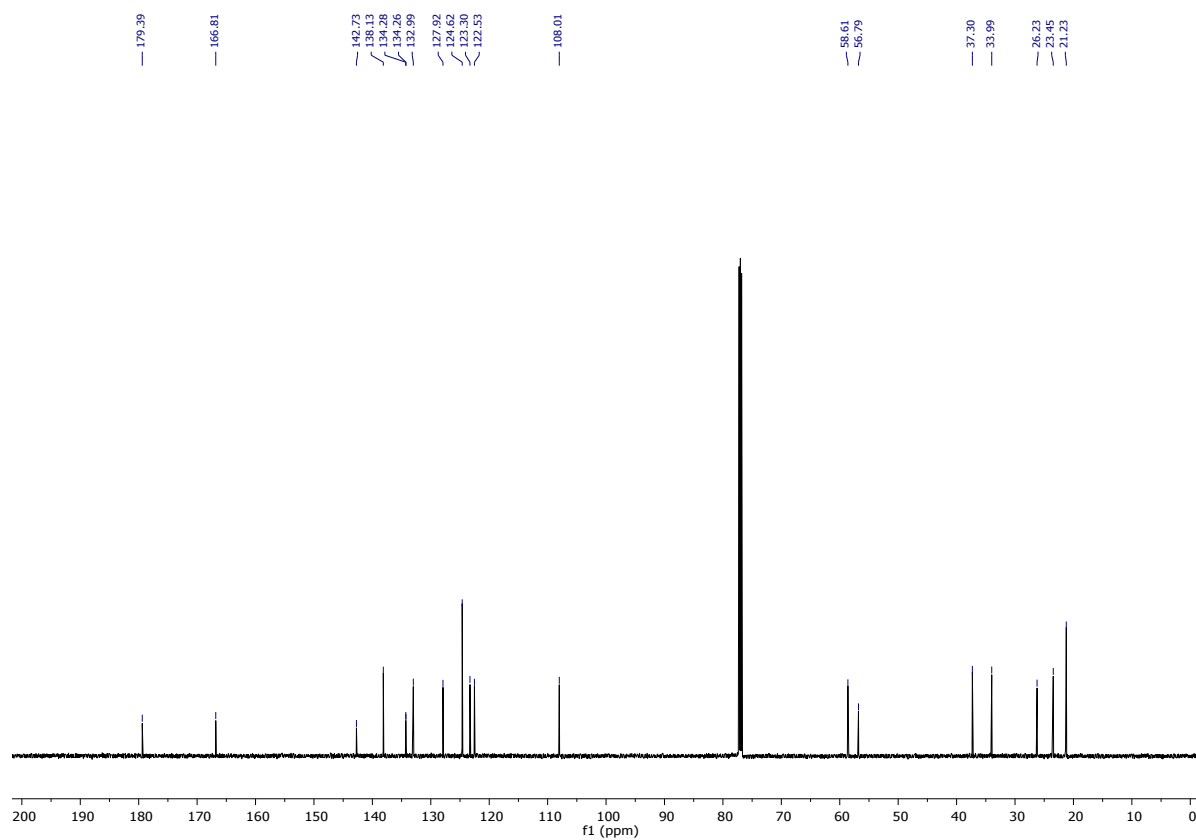

**3,5-Dichloro-*N*-[1'-methyl-2'-oxospiro(cyclopentane-1,3'-indolin)-2-yl]benzamide (Table 3, 5h)**

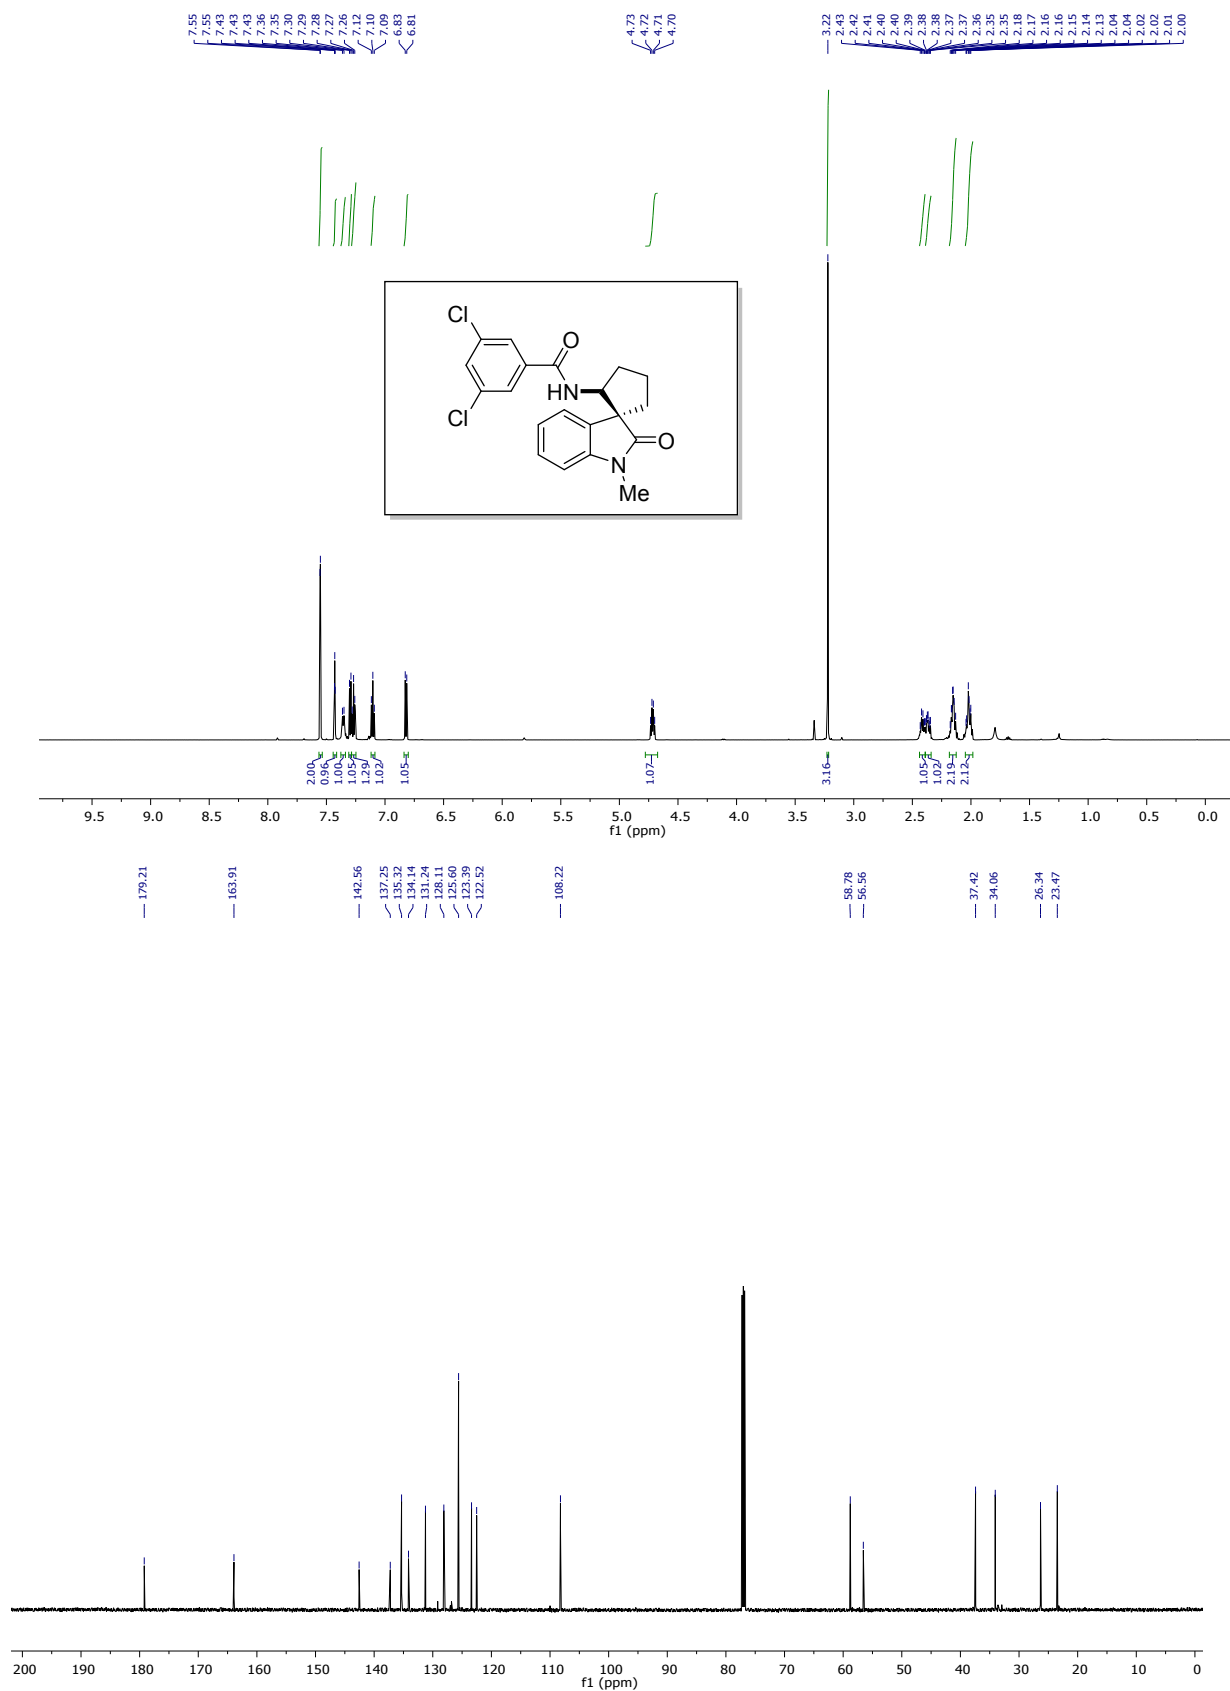

***N*-[1'-Benzyl-2'-oxospiro(cyclopentane-1,3'-indolin)-2-yl]-4-bromobenzamide (Table 3, 5i)**

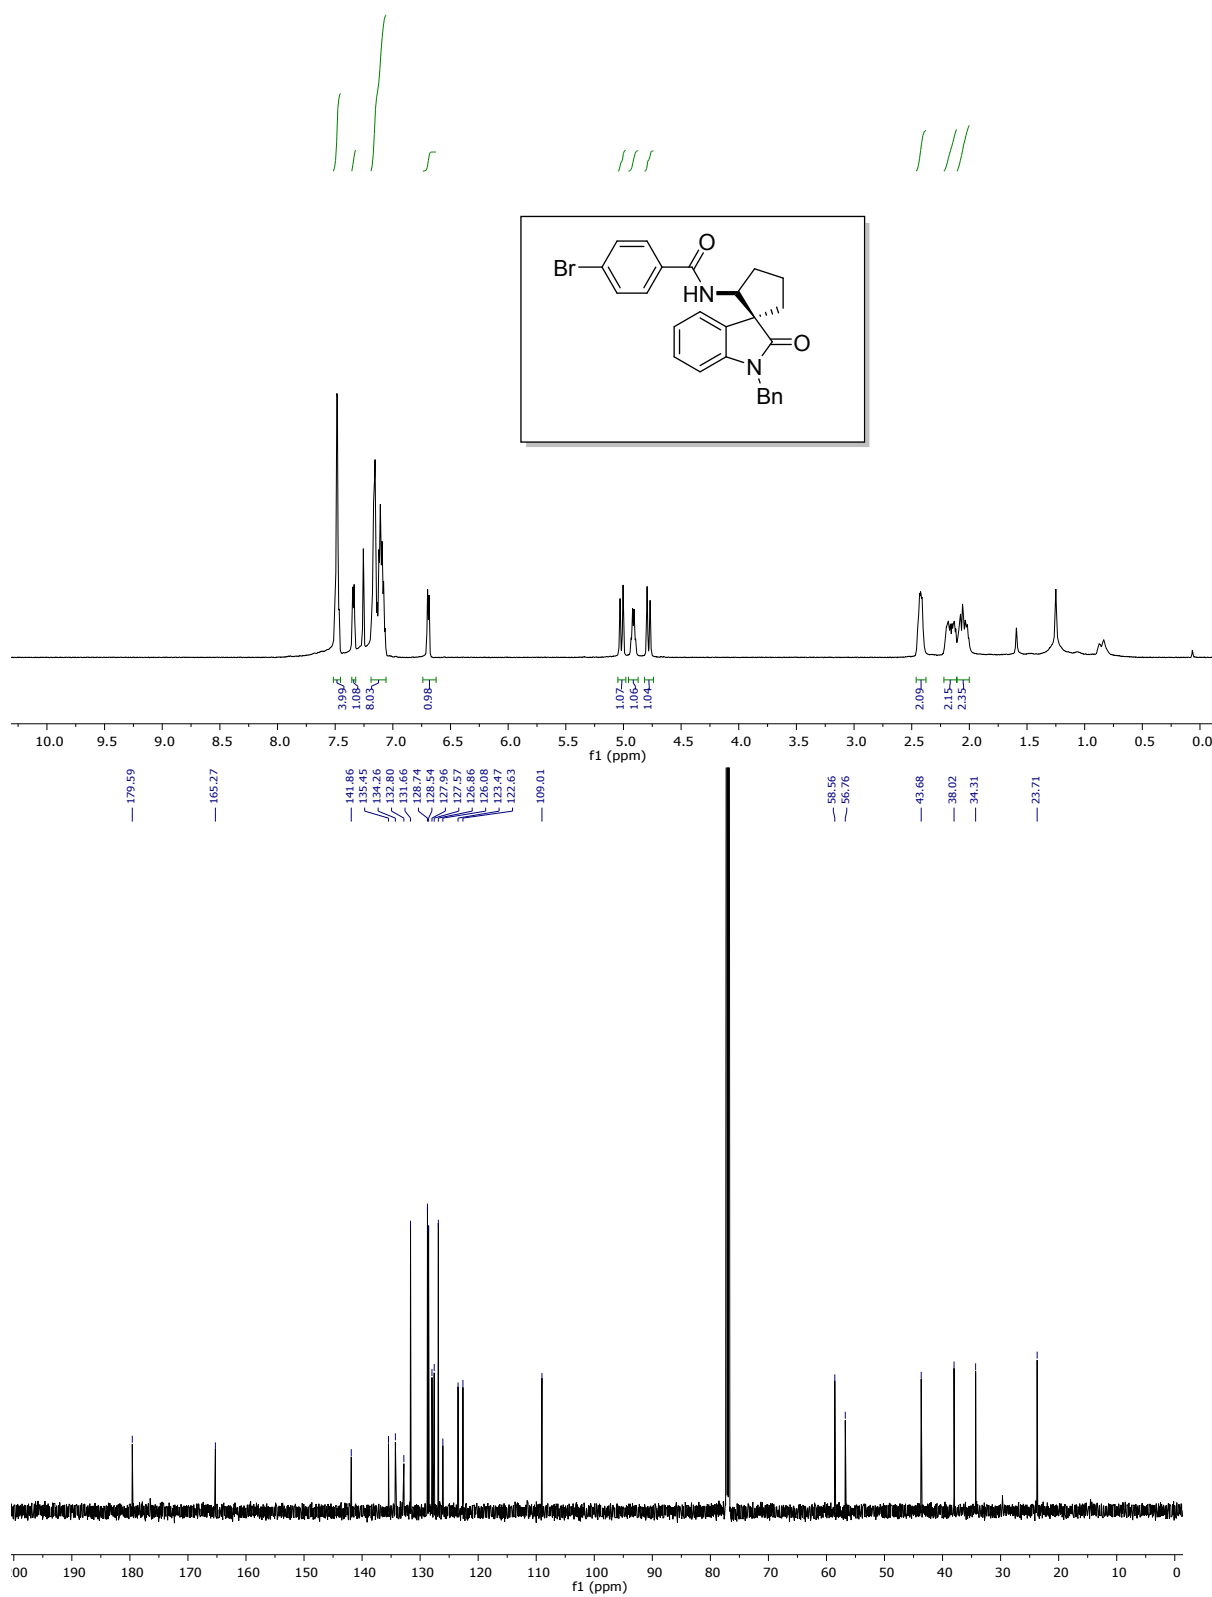

**4-Bromo-N-[1',7'-dimethyl-2'-oxospiro(cyclopentane-1,3'-indolin)-2-yl]benzamide (Table 3, 5j)**

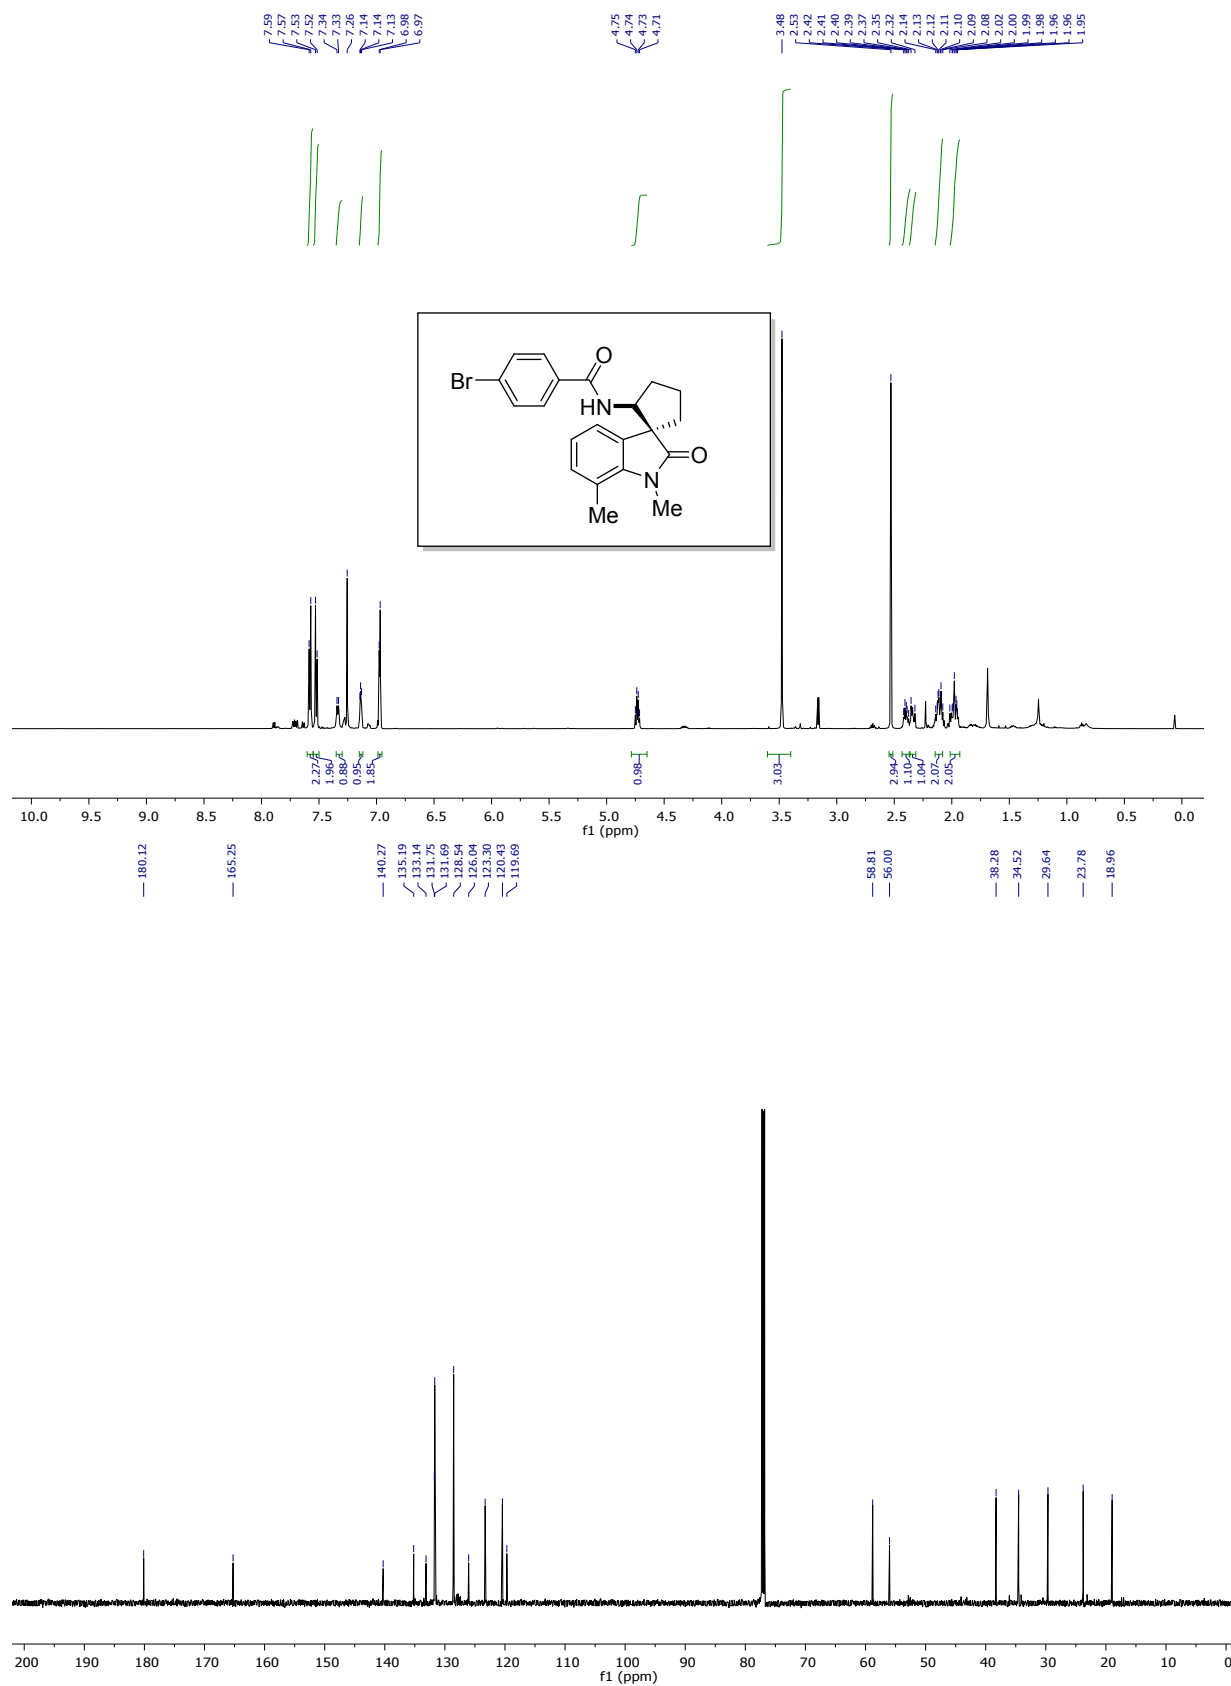

***N*-[1'-Methyl-2'-oxo-5'-(trifluoromethyl)spiro(cyclopentane-1,3'-indolin)-2-yl]benzamide (Table 3, 5k)**

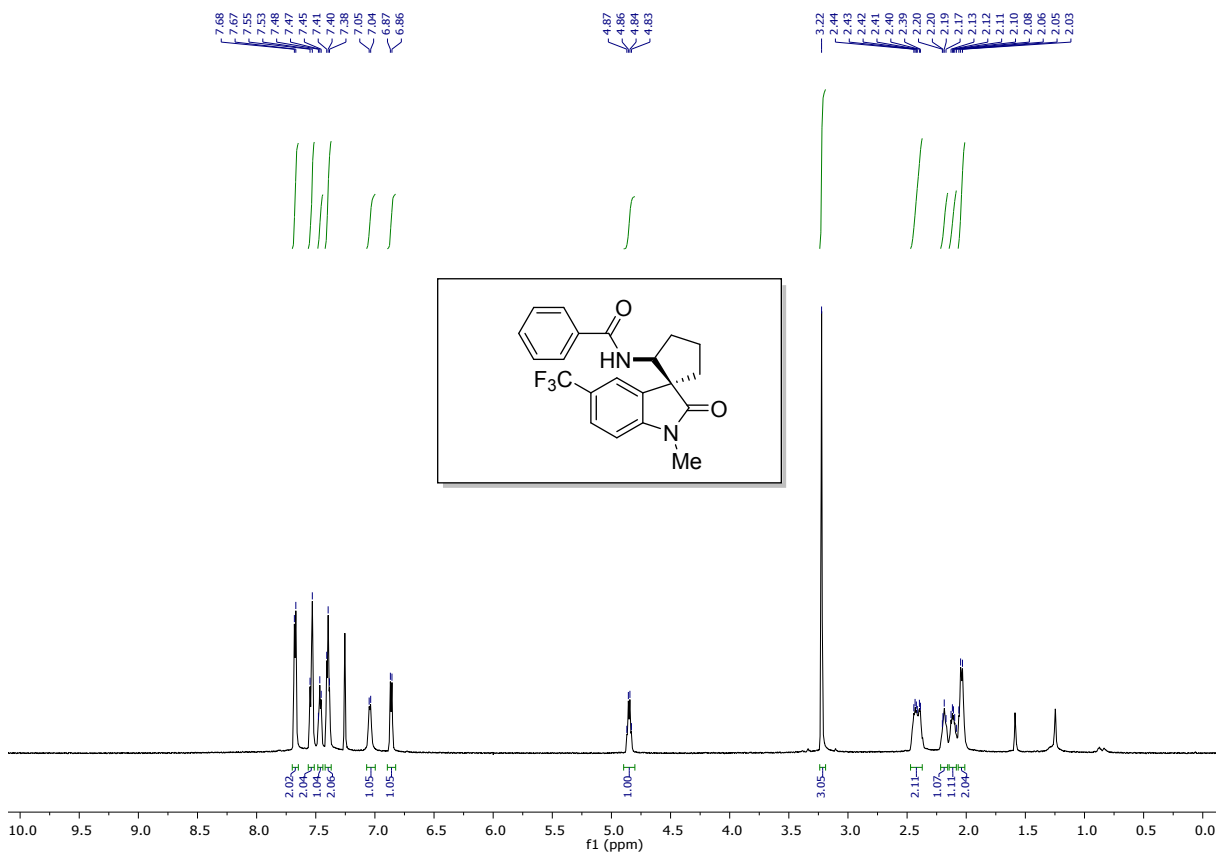



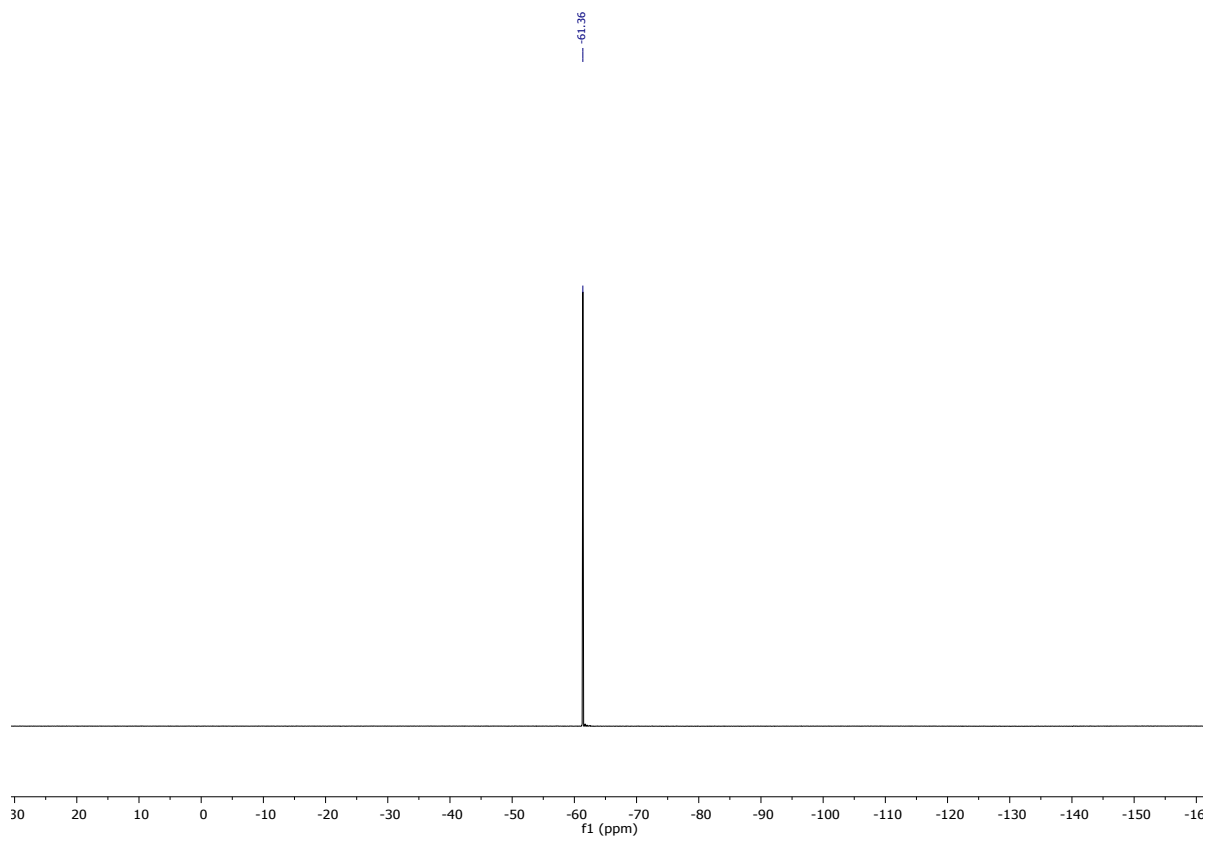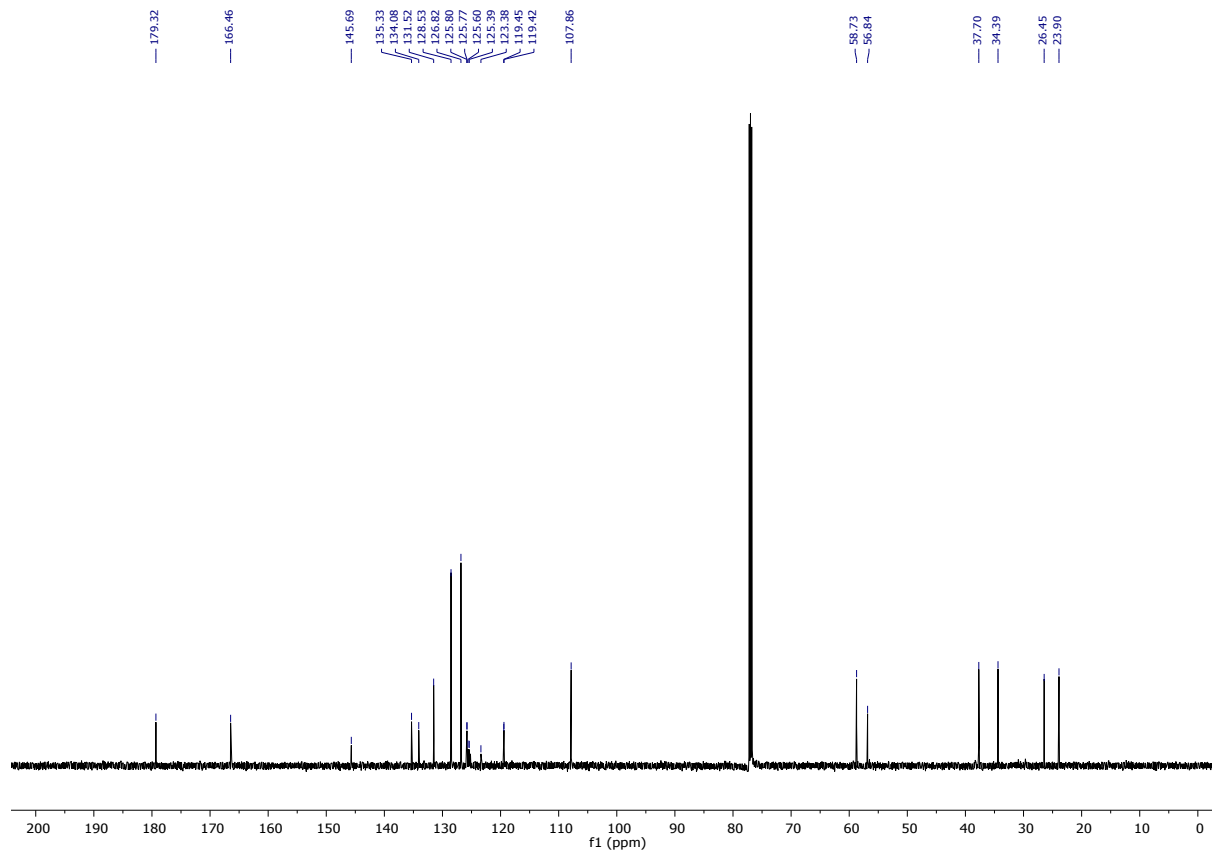

*Appendix II*

**Crystallographic Data for  
3a (CCDC 1505485)**

**and**

## **5d (CCDC 1505486)**

*N*-[(1,3-Dimethyl-2-oxindolin-3-yl)methyl]-4-methoxybenzamide (Table 2, 3a)

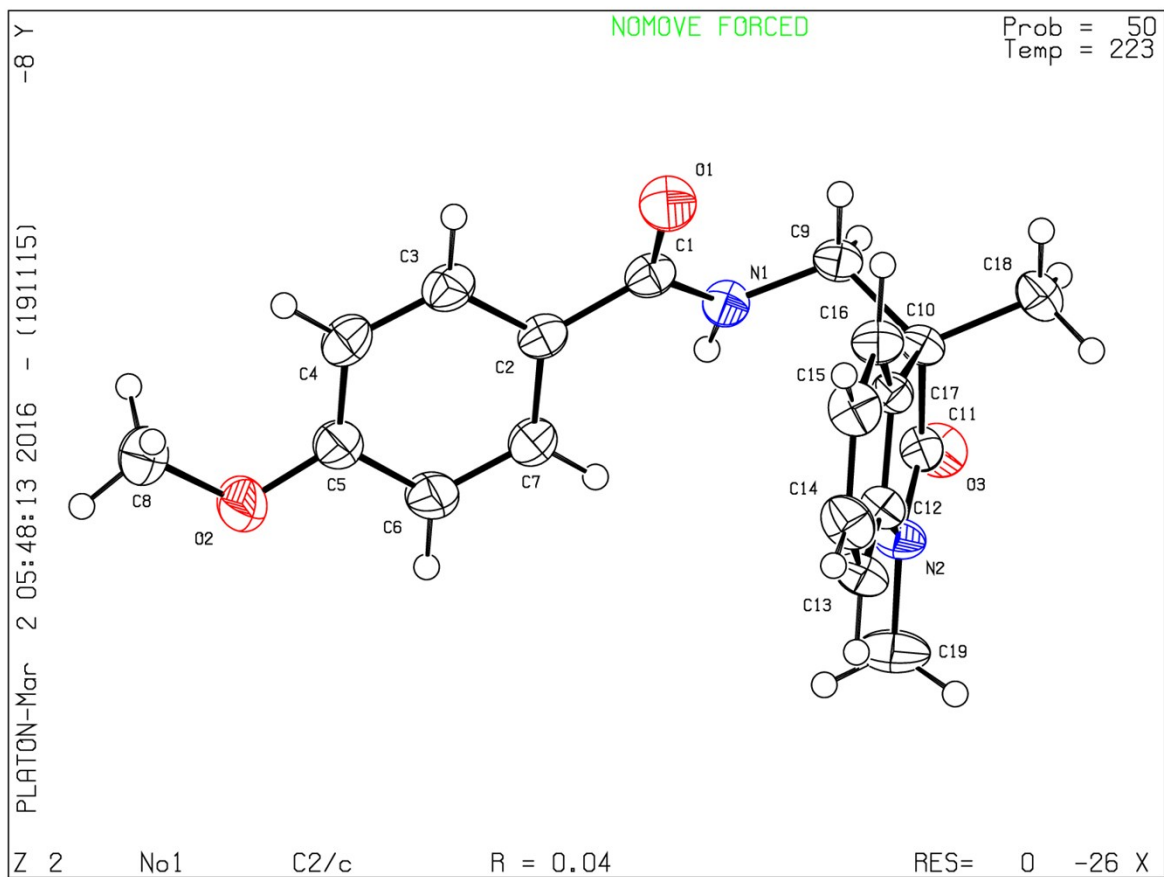

- CCDC 1505485

**Table S1.** Crystal data and structure refinement for **3a**.

|                                   |                                                               |                    |
|-----------------------------------|---------------------------------------------------------------|--------------------|
| Identification code               | <b>3a</b>                                                     |                    |
| Empirical formula                 | C <sub>19</sub> H <sub>20</sub> N <sub>2</sub> O <sub>3</sub> |                    |
| Formula weight                    | 324.37                                                        |                    |
| Temperature                       | 223(2) K                                                      |                    |
| Wavelength                        | 0.71073 Å                                                     |                    |
| Crystal system                    | Monoclinic                                                    |                    |
| Space group                       | C2/c                                                          |                    |
| Unit cell dimensions              | a = 17.4957(4) Å                                              | α = 90°.           |
|                                   | b = 13.0591(4) Å                                              | β = 113.4471(11)°. |
|                                   | c = 16.2596(5) Å                                              | γ = 90°.           |
| Volume                            | 3408.21(17) Å <sup>3</sup>                                    |                    |
| Z                                 | 8                                                             |                    |
| Density (calculated)              | 1.264 Mg/m <sup>3</sup>                                       |                    |
| Absorption coefficient            | 0.086 mm <sup>-1</sup>                                        |                    |
| F(000)                            | 1376                                                          |                    |
| Crystal size                      | 0.23 x 0.15 x 0.10 mm <sup>3</sup>                            |                    |
| Theta range for data collection   | 2.13 to 28.33°.                                               |                    |
| Index ranges                      | -23 ≤ h ≤ 23, -17 ≤ k ≤ 17, -21 ≤ l ≤ 21                      |                    |
| Reflections collected             | 80577                                                         |                    |
| Independent reflections           | 4246 [R(int) = 0.0572]                                        |                    |
| Completeness to theta = 28.33°    | 99.9 %                                                        |                    |
| Absorption correction             | Semi-empirical from equivalents                               |                    |
| Max. and min. transmission        | 0.9914 and 0.9804                                             |                    |
| Refinement method                 | Full-matrix least-squares on F <sup>2</sup>                   |                    |
| Data / restraints / parameters    | 4246 / 0 / 220                                                |                    |
| Goodness-of-fit on F <sup>2</sup> | 1.040                                                         |                    |
| Final R indices [I > 2σ(I)]       | R1 = 0.0435, wR2 = 0.1073                                     |                    |
| R indices (all data)              | R1 = 0.0621, wR2 = 0.1180                                     |                    |
| Largest diff. peak and hole       | 0.245 and -0.164 e.Å <sup>-3</sup>                            |                    |

**Table S2.** Atomic coordinates ( $\times 10^4$ ) and equivalent isotropic displacement parameters ( $\text{\AA}^2 \times 10^3$ ) for **3a**.  $U(\text{eq})$  is defined as one third of the trace of the orthogonalized  $U^{ij}$  tensor.

|       | x        | y        | z       | U(eq) |
|-------|----------|----------|---------|-------|
| C(1)  | 1468(1)  | 9720(1)  | 970(1)  | 32(1) |
| O(1)  | 1598(1)  | 10610(1) | 1238(1) | 45(1) |
| C(2)  | 784(1)   | 9099(1)  | 1050(1) | 32(1) |
| C(3)  | 107(1)   | 9597(1)  | 1108(1) | 38(1) |
| C(4)  | -542(1)  | 9059(1)  | 1185(1) | 42(1) |
| C(5)  | -519(1)  | 8002(1)  | 1211(1) | 41(1) |
| C(6)  | 161(1)   | 7492(1)  | 1166(1) | 51(1) |
| C(7)  | 801(1)   | 8033(1)  | 1084(1) | 43(1) |
| O(2)  | -1129(1) | 7393(1)  | 1271(1) | 61(1) |
| C(8)  | -1839(1) | 7874(2)  | 1318(2) | 60(1) |
| N(1)  | 1926(1)  | 9246(1)  | 584(1)  | 31(1) |
| C(9)  | 2664(1)  | 9709(1)  | 548(1)  | 30(1) |
| C(10) | 3472(1)  | 9254(1)  | 1241(1) | 26(1) |
| C(11) | 3507(1)  | 8102(1)  | 1080(1) | 28(1) |
| O(3)  | 3467(1)  | 7710(1)  | 381(1)  | 40(1) |
| N(2)  | 3597(1)  | 7595(1)  | 1843(1) | 32(1) |
| C(12) | 3613(1)  | 8280(1)  | 2519(1) | 28(1) |
| C(13) | 3714(1)  | 8063(1)  | 3388(1) | 37(1) |
| C(14) | 3703(1)  | 8890(1)  | 3923(1) | 40(1) |
| C(15) | 3593(1)  | 9880(1)  | 3602(1) | 38(1) |
| C(16) | 3500(1)  | 10083(1) | 2725(1) | 33(1) |
| C(17) | 3517(1)  | 9276(1)  | 2187(1) | 26(1) |
| C(18) | 4232(1)  | 9762(1)  | 1169(1) | 35(1) |
| C(19) | 3659(1)  | 6490(1)  | 1935(1) | 52(1) |

**Table S3.** Bond lengths [Å] and angles [°] for **3a**.

---

|             |            |
|-------------|------------|
| C(1)-O(1)   | 1.2296(17) |
| C(1)-N(1)   | 1.3508(17) |
| C(1)-C(2)   | 1.493(2)   |
| C(2)-C(3)   | 1.3873(19) |
| C(2)-C(7)   | 1.394(2)   |
| C(3)-C(4)   | 1.382(2)   |
| C(3)-H(3)   | 0.9400     |
| C(4)-C(5)   | 1.382(2)   |
| C(4)-H(4)   | 0.9400     |
| C(5)-O(2)   | 1.3653(19) |
| C(5)-C(6)   | 1.390(2)   |
| C(6)-C(7)   | 1.376(2)   |
| C(6)-H(6)   | 0.9400     |
| C(7)-H(7)   | 0.9400     |
| O(2)-C(8)   | 1.420(2)   |
| C(8)-H(8A)  | 0.9700     |
| C(8)-H(8B)  | 0.9700     |
| C(8)-H(8C)  | 0.9700     |
| N(1)-C(9)   | 1.4468(17) |
| N(1)-H(1A)  | 0.8700     |
| C(9)-C(10)  | 1.5347(18) |
| C(9)-H(9A)  | 0.9800     |
| C(9)-H(9B)  | 0.9800     |
| C(10)-C(17) | 1.5091(17) |
| C(10)-C(18) | 1.5313(18) |
| C(10)-C(11) | 1.5317(18) |
| C(11)-O(3)  | 1.2233(16) |
| C(11)-N(2)  | 1.3592(18) |
| N(2)-C(12)  | 1.4094(17) |
| N(2)-C(19)  | 1.4499(18) |
| C(12)-C(13) | 1.3816(19) |
| C(12)-C(17) | 1.3919(18) |
| C(13)-C(14) | 1.392(2)   |
| C(13)-H(13) | 0.9400     |
| C(14)-C(15) | 1.379(2)   |

|              |            |
|--------------|------------|
| C(14)-H(14)  | 0.9400     |
| C(15)-C(16)  | 1.394(2)   |
| C(15)-H(15)  | 0.9400     |
| C(16)-C(17)  | 1.3775(19) |
| C(16)-H(16)  | 0.9400     |
| C(18)-H(18A) | 0.9700     |
| C(18)-H(18B) | 0.9700     |
| C(18)-H(18C) | 0.9700     |
| C(19)-H(19A) | 0.9700     |
| C(19)-H(19B) | 0.9700     |
| C(19)-H(19C) | 0.9700     |

|                  |            |
|------------------|------------|
| O(1)-C(1)-N(1)   | 122.52(14) |
| O(1)-C(1)-C(2)   | 121.63(13) |
| N(1)-C(1)-C(2)   | 115.84(12) |
| C(3)-C(2)-C(7)   | 118.07(14) |
| C(3)-C(2)-C(1)   | 119.15(13) |
| C(7)-C(2)-C(1)   | 122.77(13) |
| C(4)-C(3)-C(2)   | 121.54(14) |
| C(4)-C(3)-H(3)   | 119.2      |
| C(2)-C(3)-H(3)   | 119.2      |
| C(5)-C(4)-C(3)   | 119.68(14) |
| C(5)-C(4)-H(4)   | 120.2      |
| C(3)-C(4)-H(4)   | 120.2      |
| O(2)-C(5)-C(4)   | 124.77(14) |
| O(2)-C(5)-C(6)   | 115.69(14) |
| C(4)-C(5)-C(6)   | 119.54(15) |
| C(7)-C(6)-C(5)   | 120.38(15) |
| C(7)-C(6)-H(6)   | 119.8      |
| C(5)-C(6)-H(6)   | 119.8      |
| C(6)-C(7)-C(2)   | 120.79(14) |
| C(6)-C(7)-H(7)   | 119.6      |
| C(2)-C(7)-H(7)   | 119.6      |
| C(5)-O(2)-C(8)   | 118.08(14) |
| O(2)-C(8)-H(8A)  | 109.5      |
| O(2)-C(8)-H(8B)  | 109.5      |
| H(8A)-C(8)-H(8B) | 109.5      |



|                   |            |
|-------------------|------------|
| O(2)-C(8)-H(8C)   | 109.5      |
| H(8A)-C(8)-H(8C)  | 109.5      |
| H(8B)-C(8)-H(8C)  | 109.5      |
| C(1)-N(1)-C(9)    | 122.09(11) |
| C(1)-N(1)-H(1A)   | 119.0      |
| C(9)-N(1)-H(1A)   | 119.0      |
| N(1)-C(9)-C(10)   | 112.59(11) |
| N(1)-C(9)-H(9A)   | 109.1      |
| C(10)-C(9)-H(9A)  | 109.1      |
| N(1)-C(9)-H(9B)   | 109.1      |
| C(10)-C(9)-H(9B)  | 109.1      |
| H(9A)-C(9)-H(9B)  | 107.8      |
| C(17)-C(10)-C(18) | 112.04(11) |
| C(17)-C(10)-C(11) | 101.74(10) |
| C(18)-C(10)-C(11) | 108.52(11) |
| C(17)-C(10)-C(9)  | 113.62(11) |
| C(18)-C(10)-C(9)  | 110.50(11) |
| C(11)-C(10)-C(9)  | 109.98(11) |
| O(3)-C(11)-N(2)   | 125.91(13) |
| O(3)-C(11)-C(10)  | 125.37(12) |
| N(2)-C(11)-C(10)  | 108.72(11) |
| C(11)-N(2)-C(12)  | 111.17(11) |
| C(11)-N(2)-C(19)  | 123.80(12) |
| C(12)-N(2)-C(19)  | 125.04(12) |
| C(13)-C(12)-C(17) | 122.35(13) |
| C(13)-C(12)-N(2)  | 128.43(13) |
| C(17)-C(12)-N(2)  | 109.22(11) |
| C(12)-C(13)-C(14) | 116.83(14) |
| C(12)-C(13)-H(13) | 121.6      |
| C(14)-C(13)-H(13) | 121.6      |
| C(15)-C(14)-C(13) | 121.74(13) |
| C(15)-C(14)-H(14) | 119.1      |
| C(13)-C(14)-H(14) | 119.1      |
| C(14)-C(15)-C(16) | 120.45(14) |
| C(14)-C(15)-H(15) | 119.8      |
| C(16)-C(15)-H(15) | 119.8      |
| C(17)-C(16)-C(15) | 118.71(13) |

|                     |            |
|---------------------|------------|
| C(17)-C(16)-H(16)   | 120.6      |
| C(15)-C(16)-H(16)   | 120.6      |
| C(16)-C(17)-C(12)   | 119.90(12) |
| C(16)-C(17)-C(10)   | 131.01(12) |
| C(12)-C(17)-C(10)   | 109.07(11) |
| C(10)-C(18)-H(18A)  | 109.5      |
| C(10)-C(18)-H(18B)  | 109.5      |
| H(18A)-C(18)-H(18B) | 109.5      |
| C(10)-C(18)-H(18C)  | 109.5      |
| H(18A)-C(18)-H(18C) | 109.5      |
| H(18B)-C(18)-H(18C) | 109.5      |
| N(2)-C(19)-H(19A)   | 109.5      |
| N(2)-C(19)-H(19B)   | 109.5      |
| H(19A)-C(19)-H(19B) | 109.5      |
| N(2)-C(19)-H(19C)   | 109.5      |
| H(19A)-C(19)-H(19C) | 109.5      |
| H(19B)-C(19)-H(19C) | 109.5      |

---

Symmetry transformations used to generate equivalent atoms:

**Table S4.** Anisotropic displacement parameters ( $\text{\AA}^2 \times 10^3$ ) for **3a**. The anisotropic displacement factor exponent takes the form:  $-2\pi^2 [ h^2 a^{*2} U^{11} + \dots + 2 h k a^* b^* U^{12} ]$

|       | U11   | U22   | U33    | U23    | U13   | U12   |
|-------|-------|-------|--------|--------|-------|-------|
| C(1)  | 36(1) | 26(1) | 30(1)  | -4(1)  | 10(1) | 3(1)  |
| O(1)  | 51(1) | 30(1) | 56(1)  | -15(1) | 24(1) | -2(1) |
| C(2)  | 36(1) | 29(1) | 29(1)  | -3(1)  | 12(1) | 4(1)  |
| C(3)  | 42(1) | 29(1) | 44(1)  | -5(1)  | 18(1) | 6(1)  |
| C(4)  | 41(1) | 38(1) | 52(1)  | -2(1)  | 23(1) | 10(1) |
| C(5)  | 42(1) | 35(1) | 53(1)  | 3(1)   | 25(1) | 4(1)  |
| C(6)  | 53(1) | 28(1) | 83(1)  | 6(1)   | 40(1) | 8(1)  |
| C(7)  | 41(1) | 32(1) | 62(1)  | 2(1)   | 29(1) | 8(1)  |
| O(2)  | 52(1) | 42(1) | 106(1) | 8(1)   | 50(1) | 7(1)  |
| C(8)  | 47(1) | 56(1) | 88(2)  | 11(1)  | 40(1) | 10(1) |
| N(1)  | 33(1) | 25(1) | 33(1)  | -8(1)  | 12(1) | -2(1) |
| C(9)  | 37(1) | 28(1) | 26(1)  | 1(1)   | 12(1) | -1(1) |
| C(10) | 31(1) | 24(1) | 24(1)  | -2(1)  | 11(1) | -3(1) |
| C(11) | 30(1) | 27(1) | 30(1)  | -4(1)  | 14(1) | -2(1) |
| O(3)  | 52(1) | 36(1) | 36(1)  | -11(1) | 22(1) | -3(1) |
| N(2)  | 43(1) | 22(1) | 33(1)  | -1(1)  | 17(1) | 0(1)  |
| C(12) | 32(1) | 26(1) | 28(1)  | -1(1)  | 13(1) | -4(1) |
| C(13) | 47(1) | 33(1) | 33(1)  | 6(1)   | 18(1) | -5(1) |
| C(14) | 48(1) | 49(1) | 27(1)  | 1(1)   | 19(1) | -6(1) |
| C(15) | 44(1) | 41(1) | 30(1)  | -9(1)  | 18(1) | -2(1) |
| C(16) | 40(1) | 27(1) | 30(1)  | -3(1)  | 13(1) | 0(1)  |
| C(17) | 28(1) | 27(1) | 24(1)  | 0(1)   | 11(1) | -2(1) |
| C(18) | 37(1) | 38(1) | 32(1)  | 0(1)   | 16(1) | -8(1) |
| C(19) | 82(1) | 24(1) | 51(1)  | 1(1)   | 27(1) | 3(1)  |

**Table S5.** Hydrogen coordinates ( $\times 10^4$ ) and isotropic displacement parameters ( $\text{\AA}^2 \times 10^3$ ) for **3a**.

|        | x     | y     | z    | U(eq) |
|--------|-------|-------|------|-------|
| H(3)   | 89    | 10316 | 1096 | 46    |
| H(4)   | -997  | 9412  | 1219 | 50    |
| H(6)   | 182   | 6772  | 1192 | 61    |
| H(7)   | 1256  | 7679  | 1051 | 51    |
| H(8A)  | -1665 | 8310  | 1844 | 89    |
| H(8B)  | -2220 | 7356  | 1357 | 89    |
| H(8C)  | -2115 | 8285  | 784  | 89    |
| H(1A)  | 1774  | 8642  | 349  | 37    |
| H(9A)  | 2654  | 10447 | 653  | 36    |
| H(9B)  | 2655  | 9612  | -54  | 36    |
| H(13)  | 3786  | 7388  | 3607 | 44    |
| H(14)  | 3772  | 8770  | 4518 | 48    |
| H(15)  | 3581  | 10422 | 3977 | 45    |
| H(16)  | 3428  | 10758 | 2506 | 39    |
| H(18A) | 4223  | 10491 | 1278 | 53    |
| H(18B) | 4217  | 9651  | 573  | 53    |
| H(18C) | 4737  | 9465  | 1610 | 53    |
| H(19A) | 3547  | 6183  | 1355 | 78    |
| H(19B) | 3255  | 6244  | 2160 | 78    |
| H(19C) | 4215  | 6305  | 2352 | 78    |

**Table S6.** Torsion angles [°] for **3a**.

---

|                        |             |
|------------------------|-------------|
| O(1)-C(1)-C(2)-C(3)    | 24.0(2)     |
| N(1)-C(1)-C(2)-C(3)    | -155.67(13) |
| O(1)-C(1)-C(2)-C(7)    | -154.87(16) |
| N(1)-C(1)-C(2)-C(7)    | 25.5(2)     |
| C(7)-C(2)-C(3)-C(4)    | -1.0(2)     |
| C(1)-C(2)-C(3)-C(4)    | -179.90(14) |
| C(2)-C(3)-C(4)-C(5)    | 0.5(3)      |
| C(3)-C(4)-C(5)-O(2)    | -178.99(16) |
| C(3)-C(4)-C(5)-C(6)    | 0.4(3)      |
| O(2)-C(5)-C(6)-C(7)    | 178.60(18)  |
| C(4)-C(5)-C(6)-C(7)    | -0.9(3)     |
| C(5)-C(6)-C(7)-C(2)    | 0.4(3)      |
| C(3)-C(2)-C(7)-C(6)    | 0.5(3)      |
| C(1)-C(2)-C(7)-C(6)    | 179.41(16)  |
| C(4)-C(5)-O(2)-C(8)    | -0.5(3)     |
| C(6)-C(5)-O(2)-C(8)    | -179.91(18) |
| O(1)-C(1)-N(1)-C(9)    | 7.2(2)      |
| C(2)-C(1)-N(1)-C(9)    | -173.17(12) |
| C(1)-N(1)-C(9)-C(10)   | 102.99(15)  |
| N(1)-C(9)-C(10)-C(17)  | -53.63(15)  |
| N(1)-C(9)-C(10)-C(18)  | 179.44(11)  |
| N(1)-C(9)-C(10)-C(11)  | 59.65(14)   |
| C(17)-C(10)-C(11)-O(3) | 178.09(13)  |
| C(18)-C(10)-C(11)-O(3) | -63.62(17)  |
| C(9)-C(10)-C(11)-O(3)  | 57.36(17)   |
| C(17)-C(10)-C(11)-N(2) | -2.54(14)   |
| C(18)-C(10)-C(11)-N(2) | 115.74(12)  |
| C(9)-C(10)-C(11)-N(2)  | -123.27(12) |
| O(3)-C(11)-N(2)-C(12)  | -179.50(13) |
| C(10)-C(11)-N(2)-C(12) | 1.14(15)    |
| O(3)-C(11)-N(2)-C(19)  | -0.1(2)     |
| C(10)-C(11)-N(2)-C(19) | -179.49(14) |
| C(11)-N(2)-C(12)-C(13) | -178.40(14) |
| C(19)-N(2)-C(12)-C(13) | 2.2(2)      |
| C(11)-N(2)-C(12)-C(17) | 0.94(16)    |

|                         |             |
|-------------------------|-------------|
| C(19)-N(2)-C(12)-C(17)  | -178.42(15) |
| C(17)-C(12)-C(13)-C(14) | 1.0(2)      |
| N(2)-C(12)-C(13)-C(14)  | -179.79(14) |
| C(12)-C(13)-C(14)-C(15) | 0.3(2)      |
| C(13)-C(14)-C(15)-C(16) | -0.9(2)     |
| C(14)-C(15)-C(16)-C(17) | 0.3(2)      |
| C(15)-C(16)-C(17)-C(12) | 0.9(2)      |
| C(15)-C(16)-C(17)-C(10) | -176.98(13) |
| C(13)-C(12)-C(17)-C(16) | -1.5(2)     |
| N(2)-C(12)-C(17)-C(16)  | 179.07(12)  |
| C(13)-C(12)-C(17)-C(10) | 176.75(13)  |
| N(2)-C(12)-C(17)-C(10)  | -2.64(15)   |
| C(18)-C(10)-C(17)-C(16) | 65.41(19)   |
| C(11)-C(10)-C(17)-C(16) | -178.86(14) |
| C(9)-C(10)-C(17)-C(16)  | -60.71(19)  |
| C(18)-C(10)-C(17)-C(12) | -112.63(13) |
| C(11)-C(10)-C(17)-C(12) | 3.10(14)    |
| C(9)-C(10)-C(17)-C(12)  | 121.25(12)  |

---

Symmetry transformations used to generate equivalent atoms:

4-Bromo-N-[1'-methyl-2'-oxospiro(cyclopentane-1,3'-indolin)-2-yl]benzamide (Table 3, 5d)

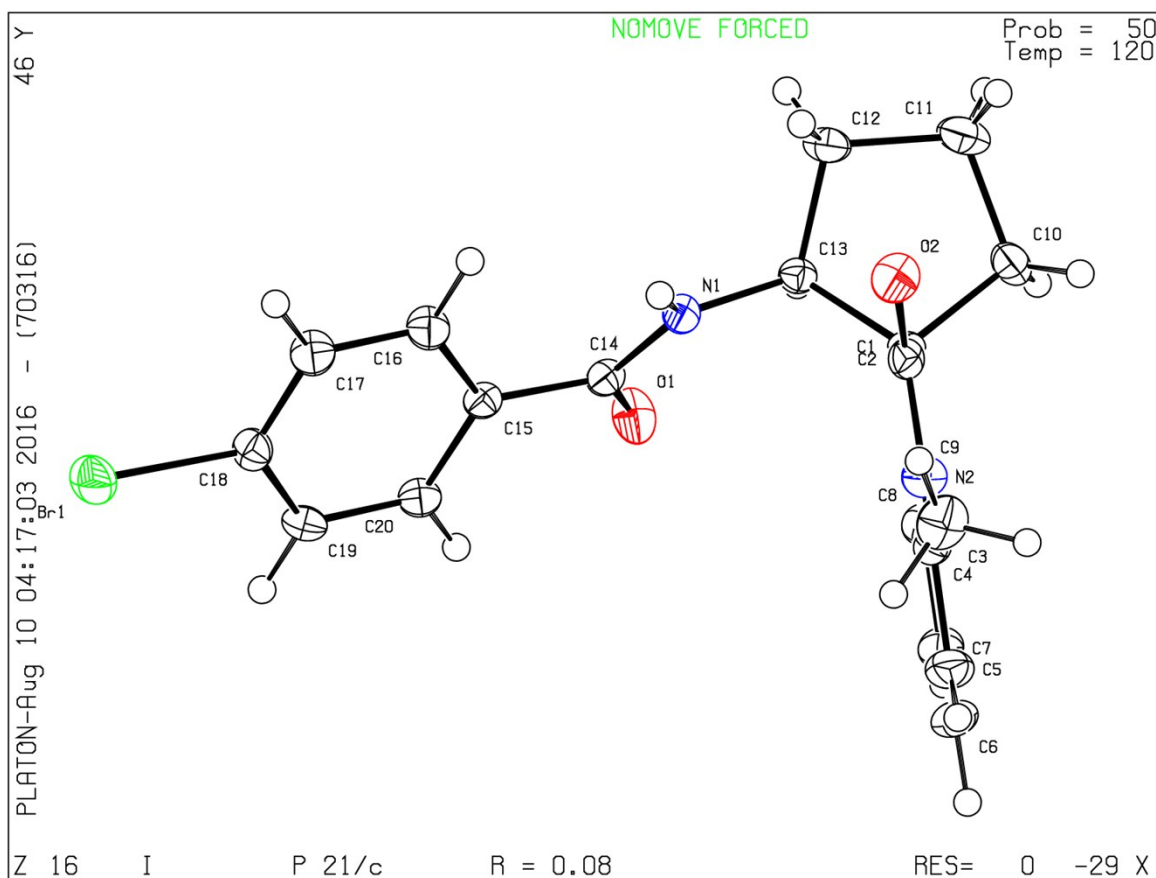

- CCDC 1505486

**Table S7.** Crystal data and structure refinement for **5d**.

|                                   |                                                                  |                 |
|-----------------------------------|------------------------------------------------------------------|-----------------|
| Identification code               | <b>5d</b>                                                        |                 |
| Empirical formula                 | C <sub>20</sub> H <sub>19</sub> Br N <sub>2</sub> O <sub>2</sub> |                 |
| Formula weight                    | 399.28                                                           |                 |
| Temperature                       | 120(2) K                                                         |                 |
| Wavelength                        | 0.71073 Å                                                        |                 |
| Crystal system                    | Monoclinic                                                       |                 |
| Space group                       | P 21/c                                                           |                 |
| Unit cell dimensions              | a = 9.5310(5) Å                                                  | α = 90°.        |
|                                   | b = 9.5367(4) Å                                                  | β = 93.809(2)°. |
|                                   | c = 19.5389(9) Å                                                 | γ = 90°.        |
| Volume                            | 1772.05(14) Å <sup>3</sup>                                       |                 |
| Z                                 | 4                                                                |                 |
| Density (calculated)              | 1.497 Mg/m <sup>3</sup>                                          |                 |
| Absorption coefficient            | 2.335 mm <sup>-1</sup>                                           |                 |
| F(000)                            | 816                                                              |                 |
| Crystal size                      | 0.310 x 0.240 x 0.210 mm <sup>3</sup>                            |                 |
| Theta range for data collection   | 2.891 to 39.502°.                                                |                 |
| Index ranges                      | -15 ≤ h ≤ 16, -17 ≤ k ≤ 15, -34 ≤ l ≤ 34                         |                 |
| Reflections collected             | 42182                                                            |                 |
| Independent reflections           | 9950 [R(int) = 0.0551]                                           |                 |
| Completeness to theta = 25.242°   | 99.8 %                                                           |                 |
| Absorption correction             | Semi-empirical from equivalents                                  |                 |
| Max. and min. transmission        | 0.7456 and 0.6249                                                |                 |
| Refinement method                 | Full-matrix least-squares on F <sup>2</sup>                      |                 |
| Data / restraints / parameters    | 9950 / 0 / 227                                                   |                 |
| Goodness-of-fit on F <sup>2</sup> | 1.049                                                            |                 |
| Final R indices [I > 2σ(I)]       | R1 = 0.0818, wR2 = 0.1503                                        |                 |
| R indices (all data)              | R1 = 0.1562, wR2 = 0.1710                                        |                 |
| Extinction coefficient            | n/a                                                              |                 |
| Largest diff. peak and hole       | 1.691 and -0.730 e.Å <sup>-3</sup>                               |                 |



**Table S8.** Atomic coordinates ( $\times 10^4$ ) and equivalent isotropic displacement parameters ( $\text{\AA}^2 \times 10^3$ ) for **5d**.  $U(\text{eq})$  is defined as one third of the trace of the orthogonalized  $U^{ij}$  tensor.

|       | x       | y        | z       | $U(\text{eq})$ |
|-------|---------|----------|---------|----------------|
| Br(1) | -372(1) | 7728(1)  | 7746(1) | 32(1)          |
| C(1)  | 4295(2) | 7934(2)  | 3728(1) | 16(1)          |
| C(2)  | 5541(2) | 8343(2)  | 4227(1) | 19(1)          |
| C(3)  | 7527(2) | 7103(3)  | 4861(1) | 32(1)          |
| C(4)  | 5526(2) | 5956(2)  | 4163(1) | 20(1)          |
| C(5)  | 5885(2) | 4560(3)  | 4264(1) | 30(1)          |
| C(6)  | 5034(3) | 3558(3)  | 3929(1) | 31(1)          |
| C(7)  | 3858(3) | 3943(2)  | 3516(1) | 28(1)          |
| C(8)  | 3510(2) | 5358(2)  | 3422(1) | 23(1)          |
| C(9)  | 4354(2) | 6365(2)  | 3743(1) | 18(1)          |
| C(10) | 4504(3) | 8578(2)  | 3013(1) | 26(1)          |
| C(11) | 3886(4) | 10054(3) | 3022(2) | 44(1)          |
| C(12) | 3027(2) | 10144(2) | 3657(1) | 27(1)          |
| C(13) | 2897(2) | 8631(2)  | 3902(1) | 18(1)          |
| C(14) | 1532(2) | 7613(2)  | 4794(1) | 18(1)          |
| C(15) | 1123(2) | 7682(2)  | 5520(1) | 17(1)          |
| C(16) | 1307(2) | 8876(2)  | 5931(1) | 25(1)          |
| C(17) | 874(2)  | 8877(2)  | 6595(1) | 26(1)          |
| C(18) | 258(2)  | 7690(2)  | 6845(1) | 22(1)          |
| C(19) | 63(2)   | 6489(2)  | 6449(1) | 22(1)          |
| C(20) | 499(2)  | 6498(2)  | 5788(1) | 21(1)          |
| N(1)  | 2537(2) | 8507(2)  | 4610(1) | 18(1)          |
| N(2)  | 6212(2) | 7142(2)  | 4443(1) | 22(1)          |
| O(1)  | 948(2)  | 6765(2)  | 4392(1) | 29(1)          |
| O(2)  | 5911(2) | 9534(2)  | 4394(1) | 28(1)          |

**Table S9.** Bond lengths [Å] and angles [°] for **5d**.

---

|              |          |
|--------------|----------|
| Br(1)-C(18)  | 1.898(2) |
| C(1)-C(9)    | 1.498(3) |
| C(1)-C(2)    | 1.537(3) |
| C(1)-C(13)   | 1.546(3) |
| C(1)-C(10)   | 1.550(3) |
| C(2)-O(2)    | 1.227(3) |
| C(2)-N(2)    | 1.364(3) |
| C(3)-N(2)    | 1.450(3) |
| C(3)-H(3A)   | 0.9800   |
| C(3)-H(3B)   | 0.9800   |
| C(3)-H(3C)   | 0.9800   |
| C(4)-C(5)    | 1.385(3) |
| C(4)-C(9)    | 1.396(3) |
| C(4)-N(2)    | 1.400(3) |
| C(5)-C(6)    | 1.390(4) |
| C(5)-H(5)    | 0.9500   |
| C(6)-C(7)    | 1.386(4) |
| C(6)-H(6)    | 0.9500   |
| C(7)-C(8)    | 1.399(3) |
| C(7)-H(7)    | 0.9500   |
| C(8)-C(9)    | 1.378(3) |
| C(8)-H(8)    | 0.9500   |
| C(10)-C(11)  | 1.526(4) |
| C(10)-H(10A) | 0.9900   |
| C(10)-H(10B) | 0.9900   |
| C(11)-C(12)  | 1.534(4) |
| C(11)-H(11A) | 0.9900   |
| C(11)-H(11B) | 0.9900   |
| C(12)-C(13)  | 1.528(3) |
| C(12)-H(12A) | 0.9900   |
| C(12)-H(12B) | 0.9900   |
| C(13)-N(1)   | 1.451(2) |
| C(13)-H(13)  | 1.0000   |
| C(14)-O(1)   | 1.234(2) |
| C(14)-N(1)   | 1.349(3) |

|             |          |
|-------------|----------|
| C(14)-C(15) | 1.497(3) |
| C(15)-C(20) | 1.394(3) |
| C(15)-C(16) | 1.398(3) |
| C(16)-C(17) | 1.388(3) |
| C(16)-H(16) | 0.9500   |
| C(17)-C(18) | 1.379(3) |
| C(17)-H(17) | 0.9500   |
| C(18)-C(19) | 1.387(3) |
| C(19)-C(20) | 1.383(3) |
| C(19)-H(19) | 0.9500   |
| C(20)-H(20) | 0.9500   |
| N(1)-H(1)   | 0.8800   |

|                  |            |
|------------------|------------|
| C(9)-C(1)-C(2)   | 102.32(15) |
| C(9)-C(1)-C(13)  | 117.18(16) |
| C(2)-C(1)-C(13)  | 113.07(16) |
| C(9)-C(1)-C(10)  | 114.01(17) |
| C(2)-C(1)-C(10)  | 109.35(16) |
| C(13)-C(1)-C(10) | 101.13(16) |
| O(2)-C(2)-N(2)   | 125.10(19) |
| O(2)-C(2)-C(1)   | 126.80(19) |
| N(2)-C(2)-C(1)   | 108.07(17) |
| N(2)-C(3)-H(3A)  | 109.5      |
| N(2)-C(3)-H(3B)  | 109.5      |
| H(3A)-C(3)-H(3B) | 109.5      |
| N(2)-C(3)-H(3C)  | 109.5      |
| H(3A)-C(3)-H(3C) | 109.5      |
| H(3B)-C(3)-H(3C) | 109.5      |
| C(5)-C(4)-C(9)   | 122.2(2)   |
| C(5)-C(4)-N(2)   | 128.0(2)   |
| C(9)-C(4)-N(2)   | 109.80(18) |
| C(4)-C(5)-C(6)   | 117.6(2)   |
| C(4)-C(5)-H(5)   | 121.2      |
| C(6)-C(5)-H(5)   | 121.2      |
| C(7)-C(6)-C(5)   | 121.1(2)   |
| C(7)-C(6)-H(6)   | 119.5      |
| C(5)-C(6)-H(6)   | 119.5      |

|                     |            |
|---------------------|------------|
| C(6)-C(7)-C(8)      | 120.5(2)   |
| C(6)-C(7)-H(7)      | 119.7      |
| C(8)-C(7)-H(7)      | 119.7      |
| C(9)-C(8)-C(7)      | 119.1(2)   |
| C(9)-C(8)-H(8)      | 120.5      |
| C(7)-C(8)-H(8)      | 120.5      |
| C(8)-C(9)-C(4)      | 119.60(19) |
| C(8)-C(9)-C(1)      | 131.81(18) |
| C(4)-C(9)-C(1)      | 108.58(17) |
| C(11)-C(10)-C(1)    | 106.40(18) |
| C(11)-C(10)-H(10A)  | 110.4      |
| C(1)-C(10)-H(10A)   | 110.4      |
| C(11)-C(10)-H(10B)  | 110.4      |
| C(1)-C(10)-H(10B)   | 110.4      |
| H(10A)-C(10)-H(10B) | 108.6      |
| C(10)-C(11)-C(12)   | 106.72(19) |
| C(10)-C(11)-H(11A)  | 110.4      |
| C(12)-C(11)-H(11A)  | 110.4      |
| C(10)-C(11)-H(11B)  | 110.4      |
| C(12)-C(11)-H(11B)  | 110.4      |
| H(11A)-C(11)-H(11B) | 108.6      |
| C(13)-C(12)-C(11)   | 105.05(19) |
| C(13)-C(12)-H(12A)  | 110.7      |
| C(11)-C(12)-H(12A)  | 110.7      |
| C(13)-C(12)-H(12B)  | 110.7      |
| C(11)-C(12)-H(12B)  | 110.7      |
| H(12A)-C(12)-H(12B) | 108.8      |
| N(1)-C(13)-C(12)    | 113.89(17) |
| N(1)-C(13)-C(1)     | 115.91(15) |
| C(12)-C(13)-C(1)    | 104.34(16) |
| N(1)-C(13)-H(13)    | 107.4      |
| C(12)-C(13)-H(13)   | 107.4      |
| C(1)-C(13)-H(13)    | 107.4      |
| O(1)-C(14)-N(1)     | 122.79(19) |
| O(1)-C(14)-C(15)    | 119.83(18) |
| N(1)-C(14)-C(15)    | 117.38(17) |
| C(20)-C(15)-C(16)   | 118.98(19) |

|                   |            |
|-------------------|------------|
| C(20)-C(15)-C(14) | 117.71(17) |
| C(16)-C(15)-C(14) | 123.29(18) |
| C(17)-C(16)-C(15) | 120.2(2)   |
| C(17)-C(16)-H(16) | 119.9      |
| C(15)-C(16)-H(16) | 119.9      |
| C(18)-C(17)-C(16) | 119.3(2)   |
| C(18)-C(17)-H(17) | 120.3      |
| C(16)-C(17)-H(17) | 120.3      |
| C(17)-C(18)-C(19) | 121.7(2)   |
| C(17)-C(18)-Br(1) | 118.72(16) |
| C(19)-C(18)-Br(1) | 119.55(17) |
| C(20)-C(19)-C(18) | 118.52(19) |
| C(20)-C(19)-H(19) | 120.7      |
| C(18)-C(19)-H(19) | 120.7      |
| C(19)-C(20)-C(15) | 121.20(19) |
| C(19)-C(20)-H(20) | 119.4      |
| C(15)-C(20)-H(20) | 119.4      |
| C(14)-N(1)-C(13)  | 121.55(17) |
| C(14)-N(1)-H(1)   | 119.2      |
| C(13)-N(1)-H(1)   | 119.2      |
| C(2)-N(2)-C(4)    | 111.12(17) |
| C(2)-N(2)-C(3)    | 124.44(19) |
| C(4)-N(2)-C(3)    | 124.26(19) |

---

Symmetry transformations used to generate equivalent atoms:

**Table S10.** Anisotropic displacement parameters ( $\text{\AA}^2 \times 10^3$ ) for **5d**. The anisotropic displacement factor exponent takes the form:  $-2\pi^2 [h^2 a^{*2} U^{11} + \dots + 2 h k a^* b^* U^{12}]$

|       | U <sup>11</sup> | U <sup>22</sup> | U <sup>33</sup> | U <sup>23</sup> | U <sup>13</sup> | U <sup>12</sup> |
|-------|-----------------|-----------------|-----------------|-----------------|-----------------|-----------------|
| Br(1) | 43(1)           | 32(1)           | 19(1)           | 0(1)            | 3(1)            | 0(1)            |
| C(1)  | 17(1)           | 10(1)           | 20(1)           | 1(1)            | 1(1)            | -2(1)           |
| C(2)  | 15(1)           | 20(1)           | 23(1)           | -1(1)           | 4(1)            | -2(1)           |
| C(3)  | 20(1)           | 42(1)           | 32(1)           | -1(1)           | -6(1)           | 3(1)            |
| C(4)  | 18(1)           | 19(1)           | 24(1)           | 2(1)            | 4(1)            | 2(1)            |
| C(5)  | 25(1)           | 25(1)           | 39(1)           | 8(1)            | 4(1)            | 6(1)            |
| C(6)  | 32(1)           | 17(1)           | 46(1)           | 3(1)            | 13(1)           | 4(1)            |
| C(7)  | 33(1)           | 16(1)           | 35(1)           | -4(1)           | 9(1)            | -4(1)           |
| C(8)  | 23(1)           | 21(1)           | 25(1)           | -2(1)           | 1(1)            | -2(1)           |
| C(9)  | 20(1)           | 15(1)           | 19(1)           | 0(1)            | 3(1)            | 1(1)            |
| C(10) | 32(1)           | 25(1)           | 21(1)           | 4(1)            | 7(1)            | -2(1)           |
| C(11) | 74(2)           | 24(1)           | 35(1)           | 12(1)           | 17(1)           | 10(1)           |
| C(12) | 30(1)           | 19(1)           | 33(1)           | 8(1)            | 4(1)            | 3(1)            |
| C(13) | 17(1)           | 17(1)           | 19(1)           | 1(1)            | 0(1)            | 0(1)            |
| C(14) | 16(1)           | 16(1)           | 23(1)           | -2(1)           | 1(1)            | -1(1)           |
| C(15) | 15(1)           | 14(1)           | 22(1)           | -2(1)           | 1(1)            | -3(1)           |
| C(16) | 30(1)           | 17(1)           | 29(1)           | -5(1)           | 7(1)            | -9(1)           |
| C(17) | 32(1)           | 18(1)           | 29(1)           | -8(1)           | 6(1)            | -9(1)           |
| C(18) | 23(1)           | 25(1)           | 16(1)           | 0(1)            | -1(1)           | 1(1)            |
| C(19) | 25(1)           | 16(1)           | 24(1)           | 3(1)            | 0(1)            | -3(1)           |
| C(20) | 21(1)           | 17(1)           | 23(1)           | -2(1)           | -1(1)           | -3(1)           |
| N(1)  | 16(1)           | 17(1)           | 22(1)           | -2(1)           | 2(1)            | -4(1)           |
| N(2)  | 17(1)           | 23(1)           | 27(1)           | 1(1)            | -2(1)           | -1(1)           |
| O(1)  | 29(1)           | 31(1)           | 27(1)           | -9(1)           | 5(1)            | -15(1)          |
| O(2)  | 23(1)           | 25(1)           | 35(1)           | -7(1)           | 1(1)            | -7(1)           |

**Table S11.** Hydrogen coordinates ( $\times 10^4$ ) and isotropic displacement parameters ( $\text{\AA}^2 \times 10^3$ ) for **5d**.

|        | x    | y     | z    | U(eq) |
|--------|------|-------|------|-------|
| H(3A)  | 7719 | 8030  | 5061 | 47    |
| H(3B)  | 8292 | 6838  | 4576 | 47    |
| H(3C)  | 7458 | 6412  | 5229 | 47    |
| H(5)   | 6683 | 4298  | 4553 | 35    |
| H(6)   | 5262 | 2593  | 3983 | 38    |
| H(7)   | 3283 | 3241  | 3296 | 33    |
| H(8)   | 2702 | 5621  | 3139 | 28    |
| H(10A) | 5517 | 8616  | 2929 | 31    |
| H(10B) | 4013 | 8009  | 2648 | 31    |
| H(11A) | 3276 | 10224 | 2600 | 52    |
| H(11B) | 4647 | 10763 | 3048 | 52    |
| H(12A) | 3516 | 10730 | 4017 | 33    |
| H(12B) | 2087 | 10551 | 3537 | 33    |
| H(13)  | 2126 | 8178  | 3609 | 21    |
| H(16)  | 1730 | 9691  | 5755 | 30    |
| H(17)  | 1001 | 9687  | 6876 | 32    |
| H(19)  | -360 | 5678  | 6629 | 26    |
| H(20)  | 371  | 5683  | 5511 | 25    |
| H(1)   | 2985 | 9027  | 4926 | 22    |

**Table S12.** Torsion angles [°] for **5d**.

---

|                         |             |
|-------------------------|-------------|
| C(9)-C(1)-C(2)-O(2)     | -178.8(2)   |
| C(13)-C(1)-C(2)-O(2)    | -51.9(3)    |
| C(10)-C(1)-C(2)-O(2)    | 59.9(3)     |
| C(9)-C(1)-C(2)-N(2)     | 3.2(2)      |
| C(13)-C(1)-C(2)-N(2)    | 130.13(17)  |
| C(10)-C(1)-C(2)-N(2)    | -118.04(19) |
| C(9)-C(4)-C(5)-C(6)     | 0.3(3)      |
| N(2)-C(4)-C(5)-C(6)     | 179.9(2)    |
| C(4)-C(5)-C(6)-C(7)     | -1.0(4)     |
| C(5)-C(6)-C(7)-C(8)     | 0.8(4)      |
| C(6)-C(7)-C(8)-C(9)     | 0.1(3)      |
| C(7)-C(8)-C(9)-C(4)     | -0.8(3)     |
| C(7)-C(8)-C(9)-C(1)     | 177.8(2)    |
| C(5)-C(4)-C(9)-C(8)     | 0.6(3)      |
| N(2)-C(4)-C(9)-C(8)     | -179.06(19) |
| C(5)-C(4)-C(9)-C(1)     | -178.3(2)   |
| N(2)-C(4)-C(9)-C(1)     | 2.1(2)      |
| C(2)-C(1)-C(9)-C(8)     | 178.2(2)    |
| C(13)-C(1)-C(9)-C(8)    | 53.9(3)     |
| C(10)-C(1)-C(9)-C(8)    | -63.9(3)    |
| C(2)-C(1)-C(9)-C(4)     | -3.1(2)     |
| C(13)-C(1)-C(9)-C(4)    | -127.39(18) |
| C(10)-C(1)-C(9)-C(4)    | 114.82(19)  |
| C(9)-C(1)-C(10)-C(11)   | 159.4(2)    |
| C(2)-C(1)-C(10)-C(11)   | -86.8(2)    |
| C(13)-C(1)-C(10)-C(11)  | 32.7(2)     |
| C(1)-C(10)-C(11)-C(12)  | -13.0(3)    |
| C(10)-C(11)-C(12)-C(13) | -12.6(3)    |
| C(11)-C(12)-C(13)-N(1)  | 160.8(2)    |
| C(11)-C(12)-C(13)-C(1)  | 33.4(2)     |
| C(9)-C(1)-C(13)-N(1)    | 68.8(2)     |
| C(2)-C(1)-C(13)-N(1)    | -49.8(2)    |
| C(10)-C(1)-C(13)-N(1)   | -166.63(17) |
| C(9)-C(1)-C(13)-C(12)   | -165.10(17) |
| C(2)-C(1)-C(13)-C(12)   | 76.3(2)     |



|                         |             |
|-------------------------|-------------|
| C(10)-C(1)-C(13)-C(12)  | -40.54(19)  |
| O(1)-C(14)-C(15)-C(20)  | 22.8(3)     |
| N(1)-C(14)-C(15)-C(20)  | -157.49(19) |
| O(1)-C(14)-C(15)-C(16)  | -155.7(2)   |
| N(1)-C(14)-C(15)-C(16)  | 24.1(3)     |
| C(20)-C(15)-C(16)-C(17) | 0.1(3)      |
| C(14)-C(15)-C(16)-C(17) | 178.5(2)    |
| C(15)-C(16)-C(17)-C(18) | -0.2(4)     |
| C(16)-C(17)-C(18)-C(19) | 0.3(3)      |
| C(16)-C(17)-C(18)-Br(1) | -178.36(18) |
| C(17)-C(18)-C(19)-C(20) | -0.3(3)     |
| Br(1)-C(18)-C(19)-C(20) | 178.41(15)  |
| C(18)-C(19)-C(20)-C(15) | 0.1(3)      |
| C(16)-C(15)-C(20)-C(19) | 0.0(3)      |
| C(14)-C(15)-C(20)-C(19) | -178.54(18) |
| O(1)-C(14)-N(1)-C(13)   | 6.6(3)      |
| C(15)-C(14)-N(1)-C(13)  | -173.14(17) |
| C(12)-C(13)-N(1)-C(14)  | 134.1(2)    |
| C(1)-C(13)-N(1)-C(14)   | -104.8(2)   |
| O(2)-C(2)-N(2)-C(4)     | 179.8(2)    |
| C(1)-C(2)-N(2)-C(4)     | -2.1(2)     |
| O(2)-C(2)-N(2)-C(3)     | -4.9(3)     |
| C(1)-C(2)-N(2)-C(3)     | 173.1(2)    |
| C(5)-C(4)-N(2)-C(2)     | -179.5(2)   |
| C(9)-C(4)-N(2)-C(2)     | 0.1(2)      |
| C(5)-C(4)-N(2)-C(3)     | 5.2(4)      |
| C(9)-C(4)-N(2)-C(3)     | -175.2(2)   |

---

Symmetry transformations used to generate equivalent atoms:

**Table S13.** Hydrogen bonds for **5d** [Å and °].

| D-H...A               | d(D-H) | d(H...A) | d(D...A)   | <(DHA) |
|-----------------------|--------|----------|------------|--------|
| C(3)-H(3B)...O(1)#1   | 0.98   | 2.58     | 3.461(3)   | 149.3  |
| C(13)-H(13)...Br(1)#2 | 1.00   | 2.95     | 3.9449(19) | 171.0  |
| C(17)-H(17)...Br(1)#3 | 0.95   | 3.06     | 3.931(2)   | 152.9  |
| N(1)-H(1)...O(2)#4    | 0.88   | 2.14     | 3.014(2)   | 173.5  |

Symmetry transformations used to generate equivalent atoms:

#1  $x+1, y, z$  #2  $x, -y+3/2, z-1/2$  #3  $-x, y+1/2, -z+3/2$

#4  $-x+1, -y+2, -z+1$
